# Supplementary material for: Global patterns of Earth's dynamic topography since the Jurassic
Source: Copernicus journal article supplement (doi:10.5194/se-2017-26), 2017-03-23

Dynamic Topography shown in Plate Frame of Reference (200 Ma)

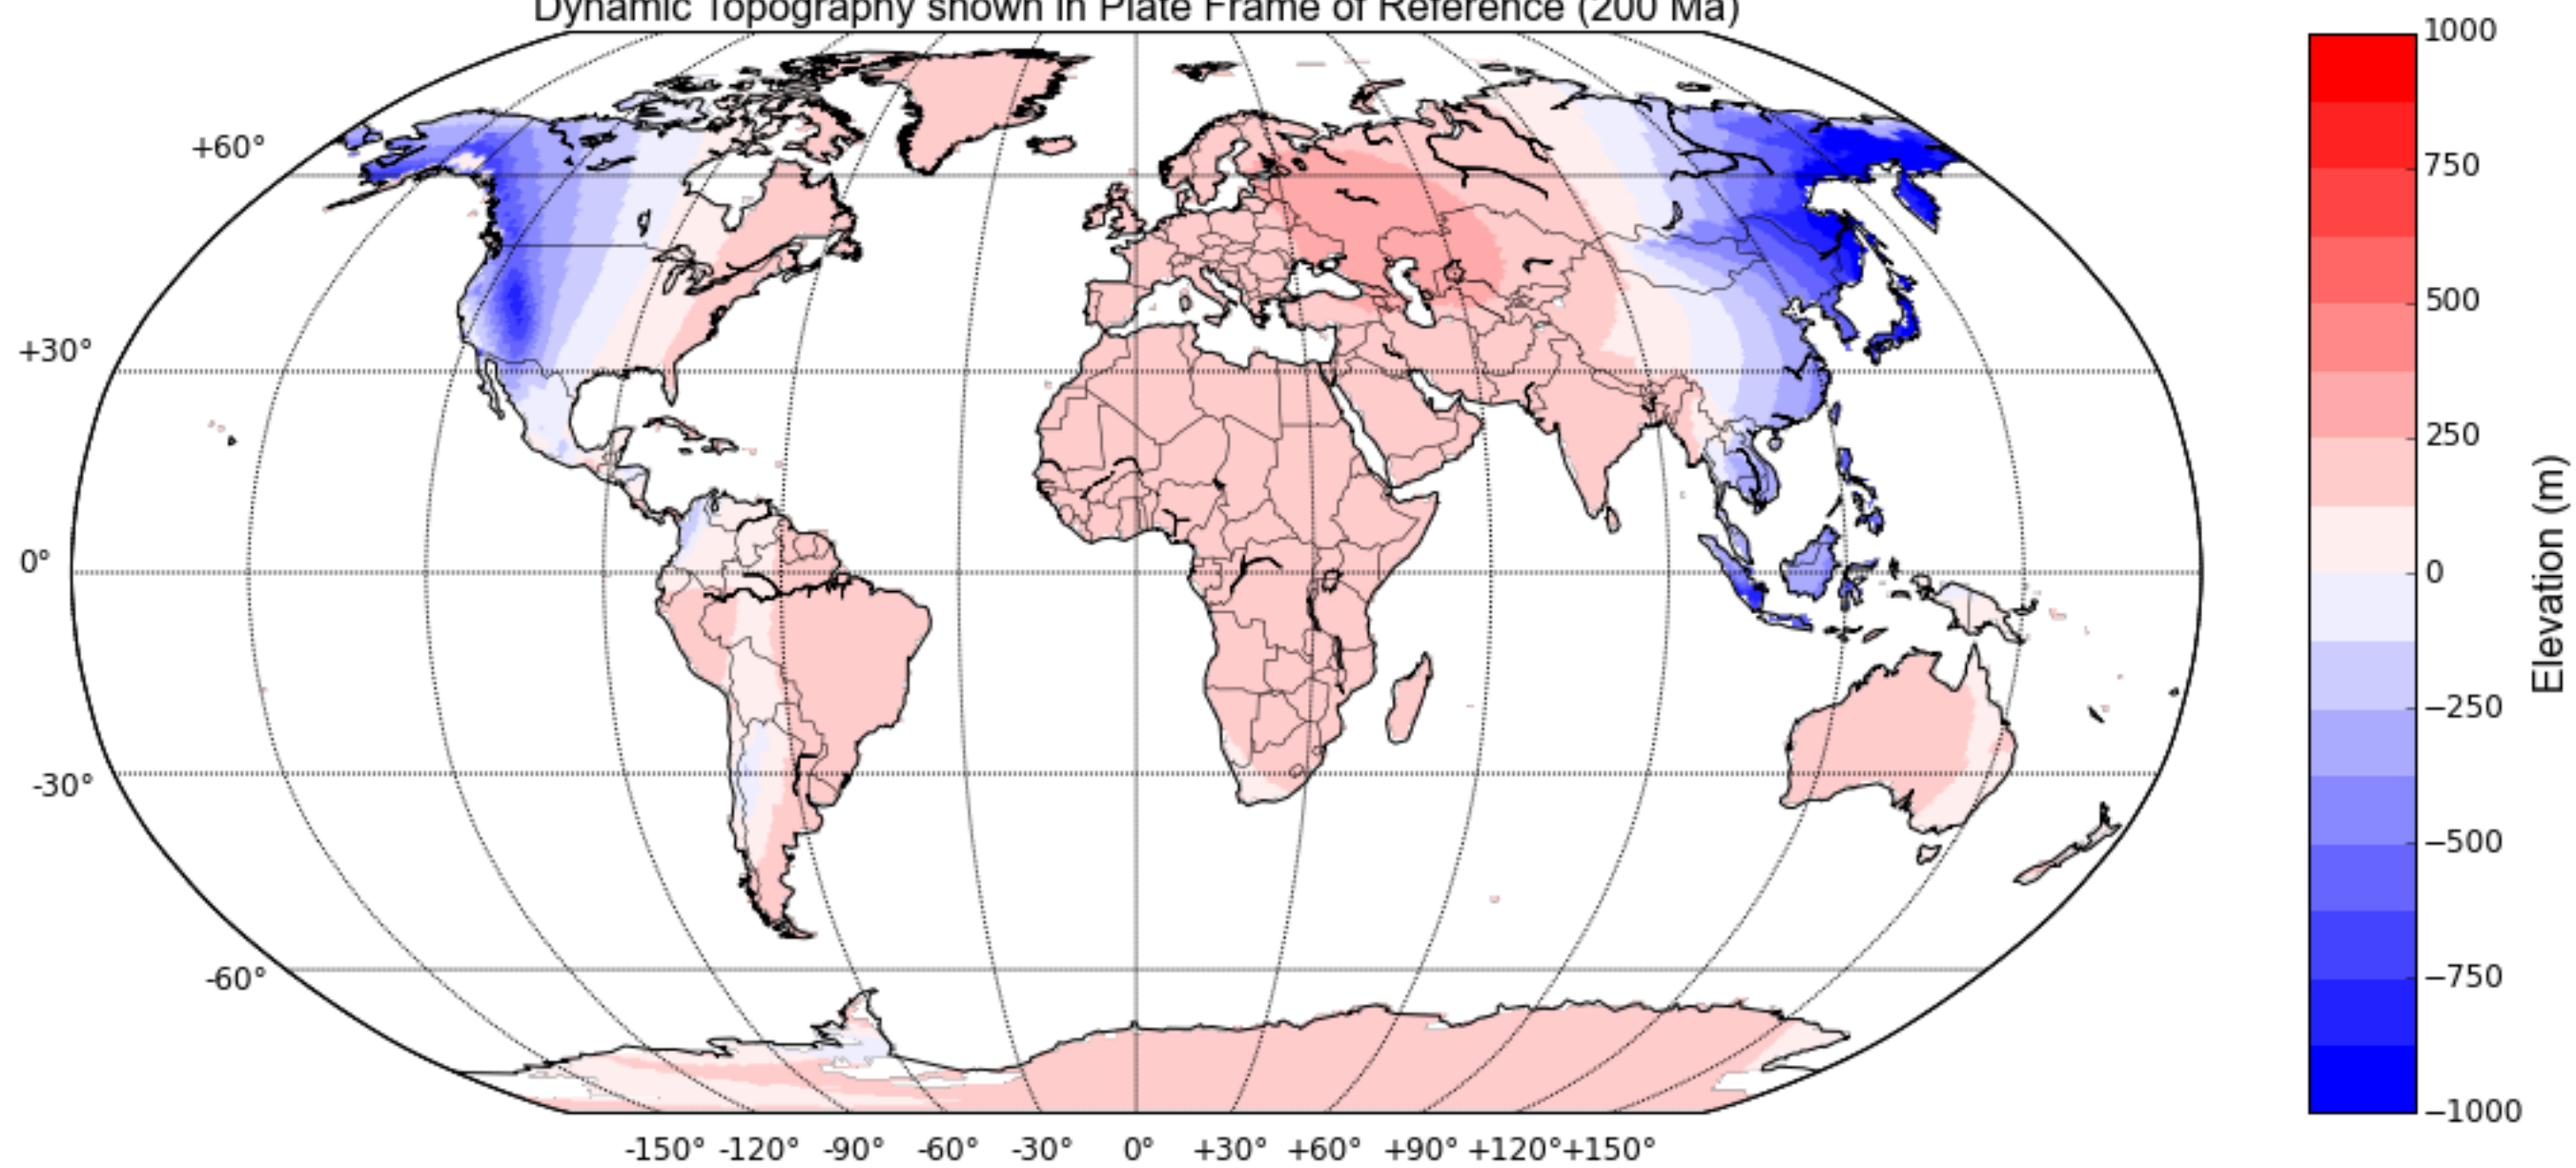

Dynamic Topography shown in Plate Frame of Reference (190 Ma)

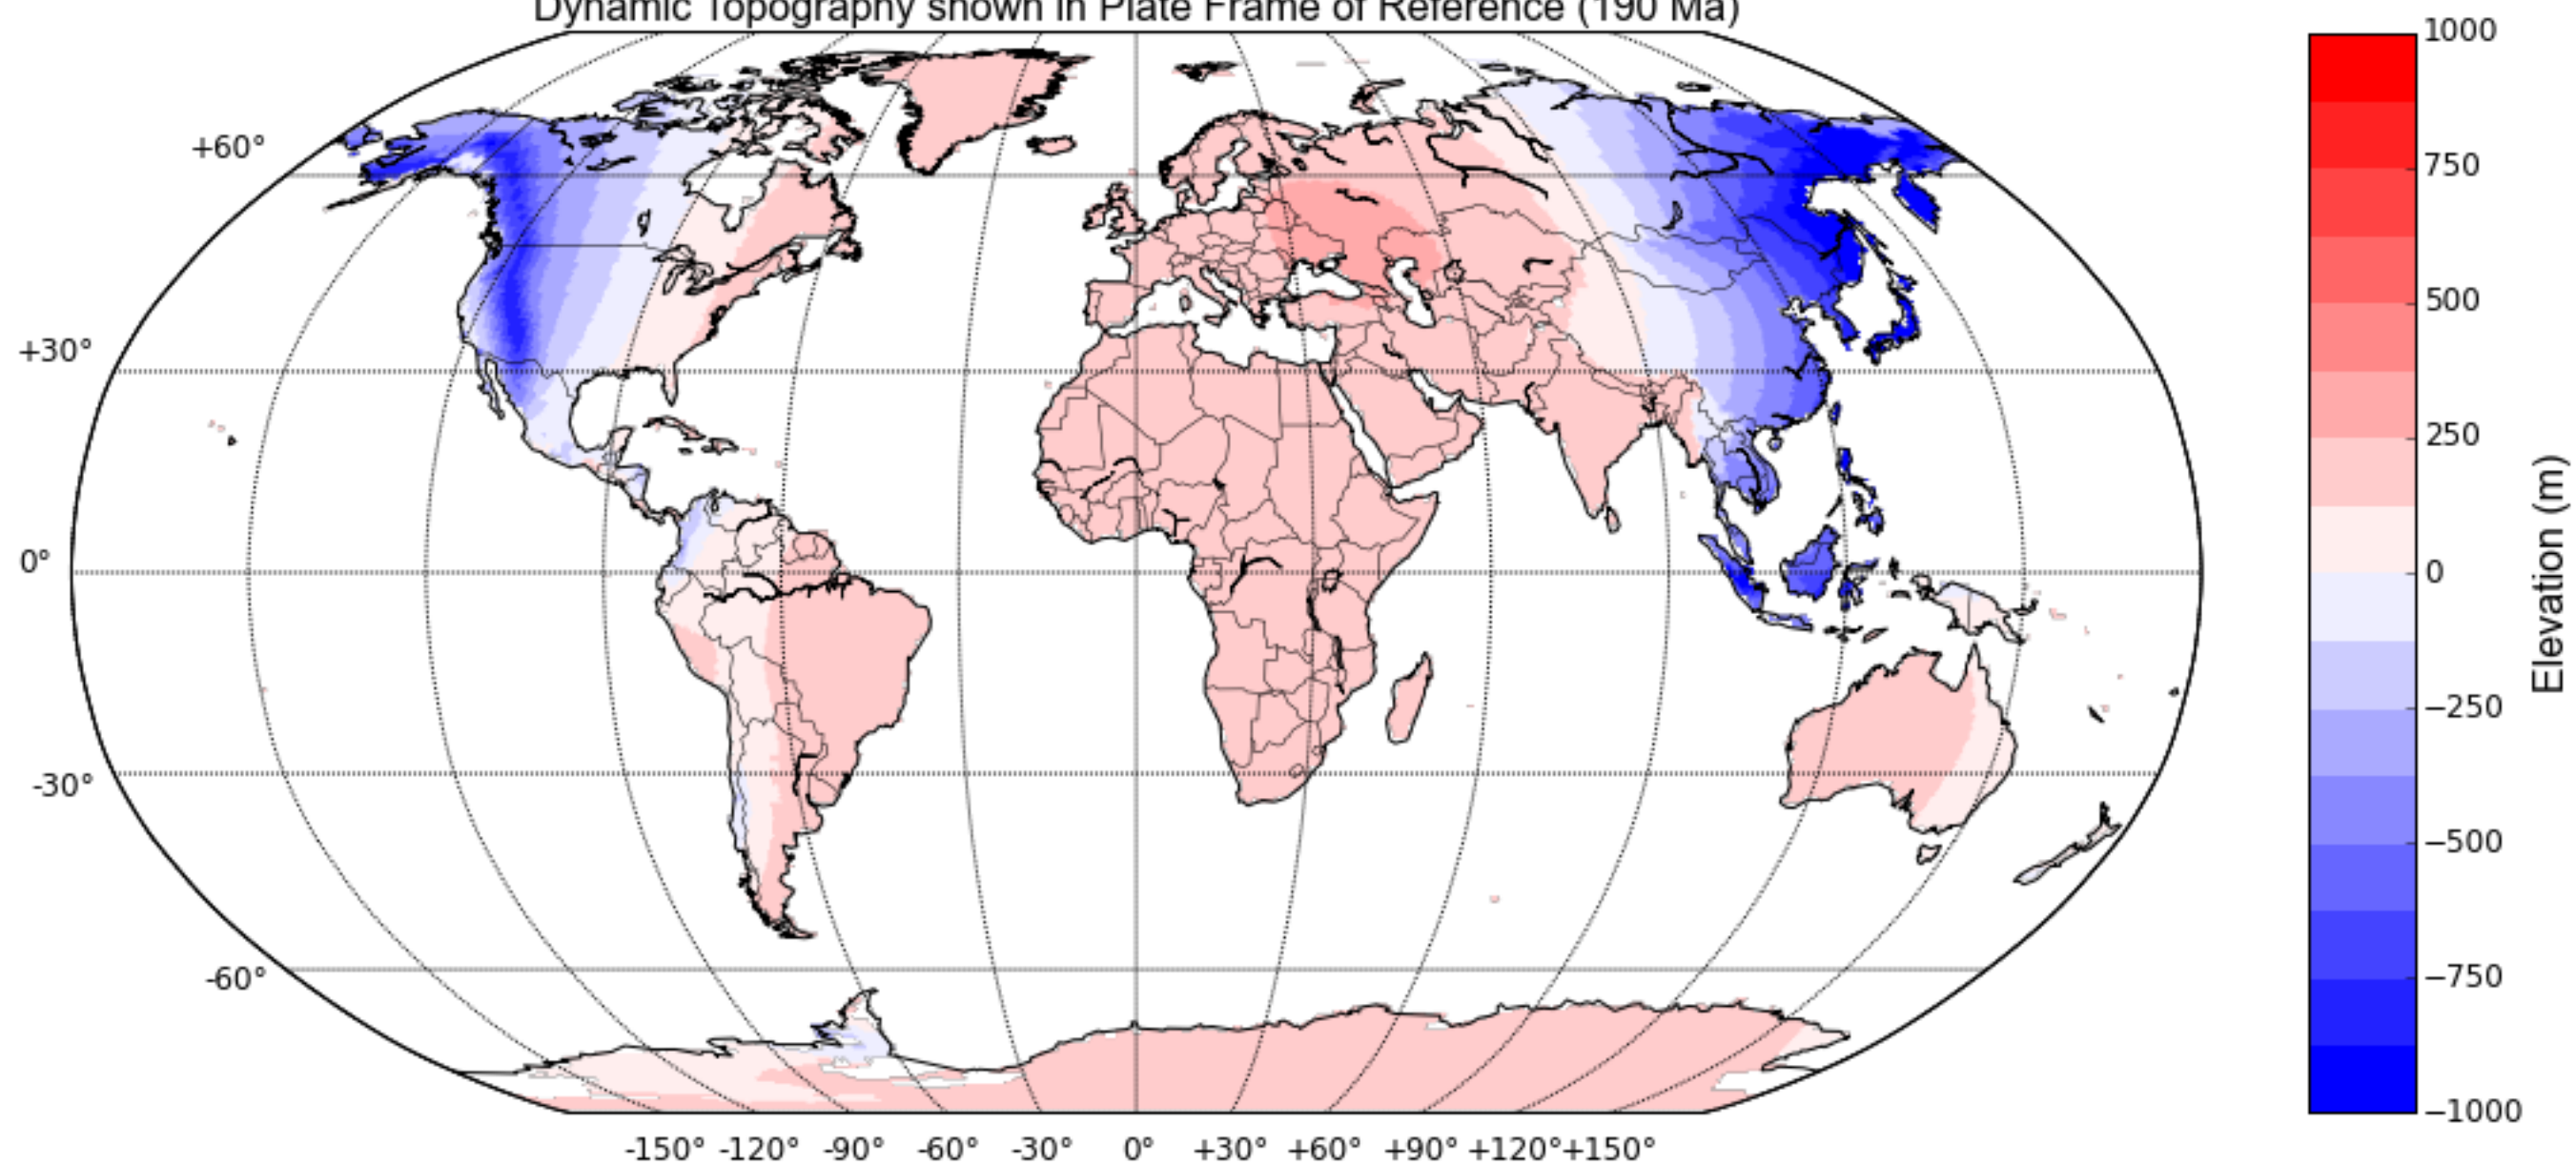

Dynamic Topography shown in Plate Frame of Reference (180 Ma)

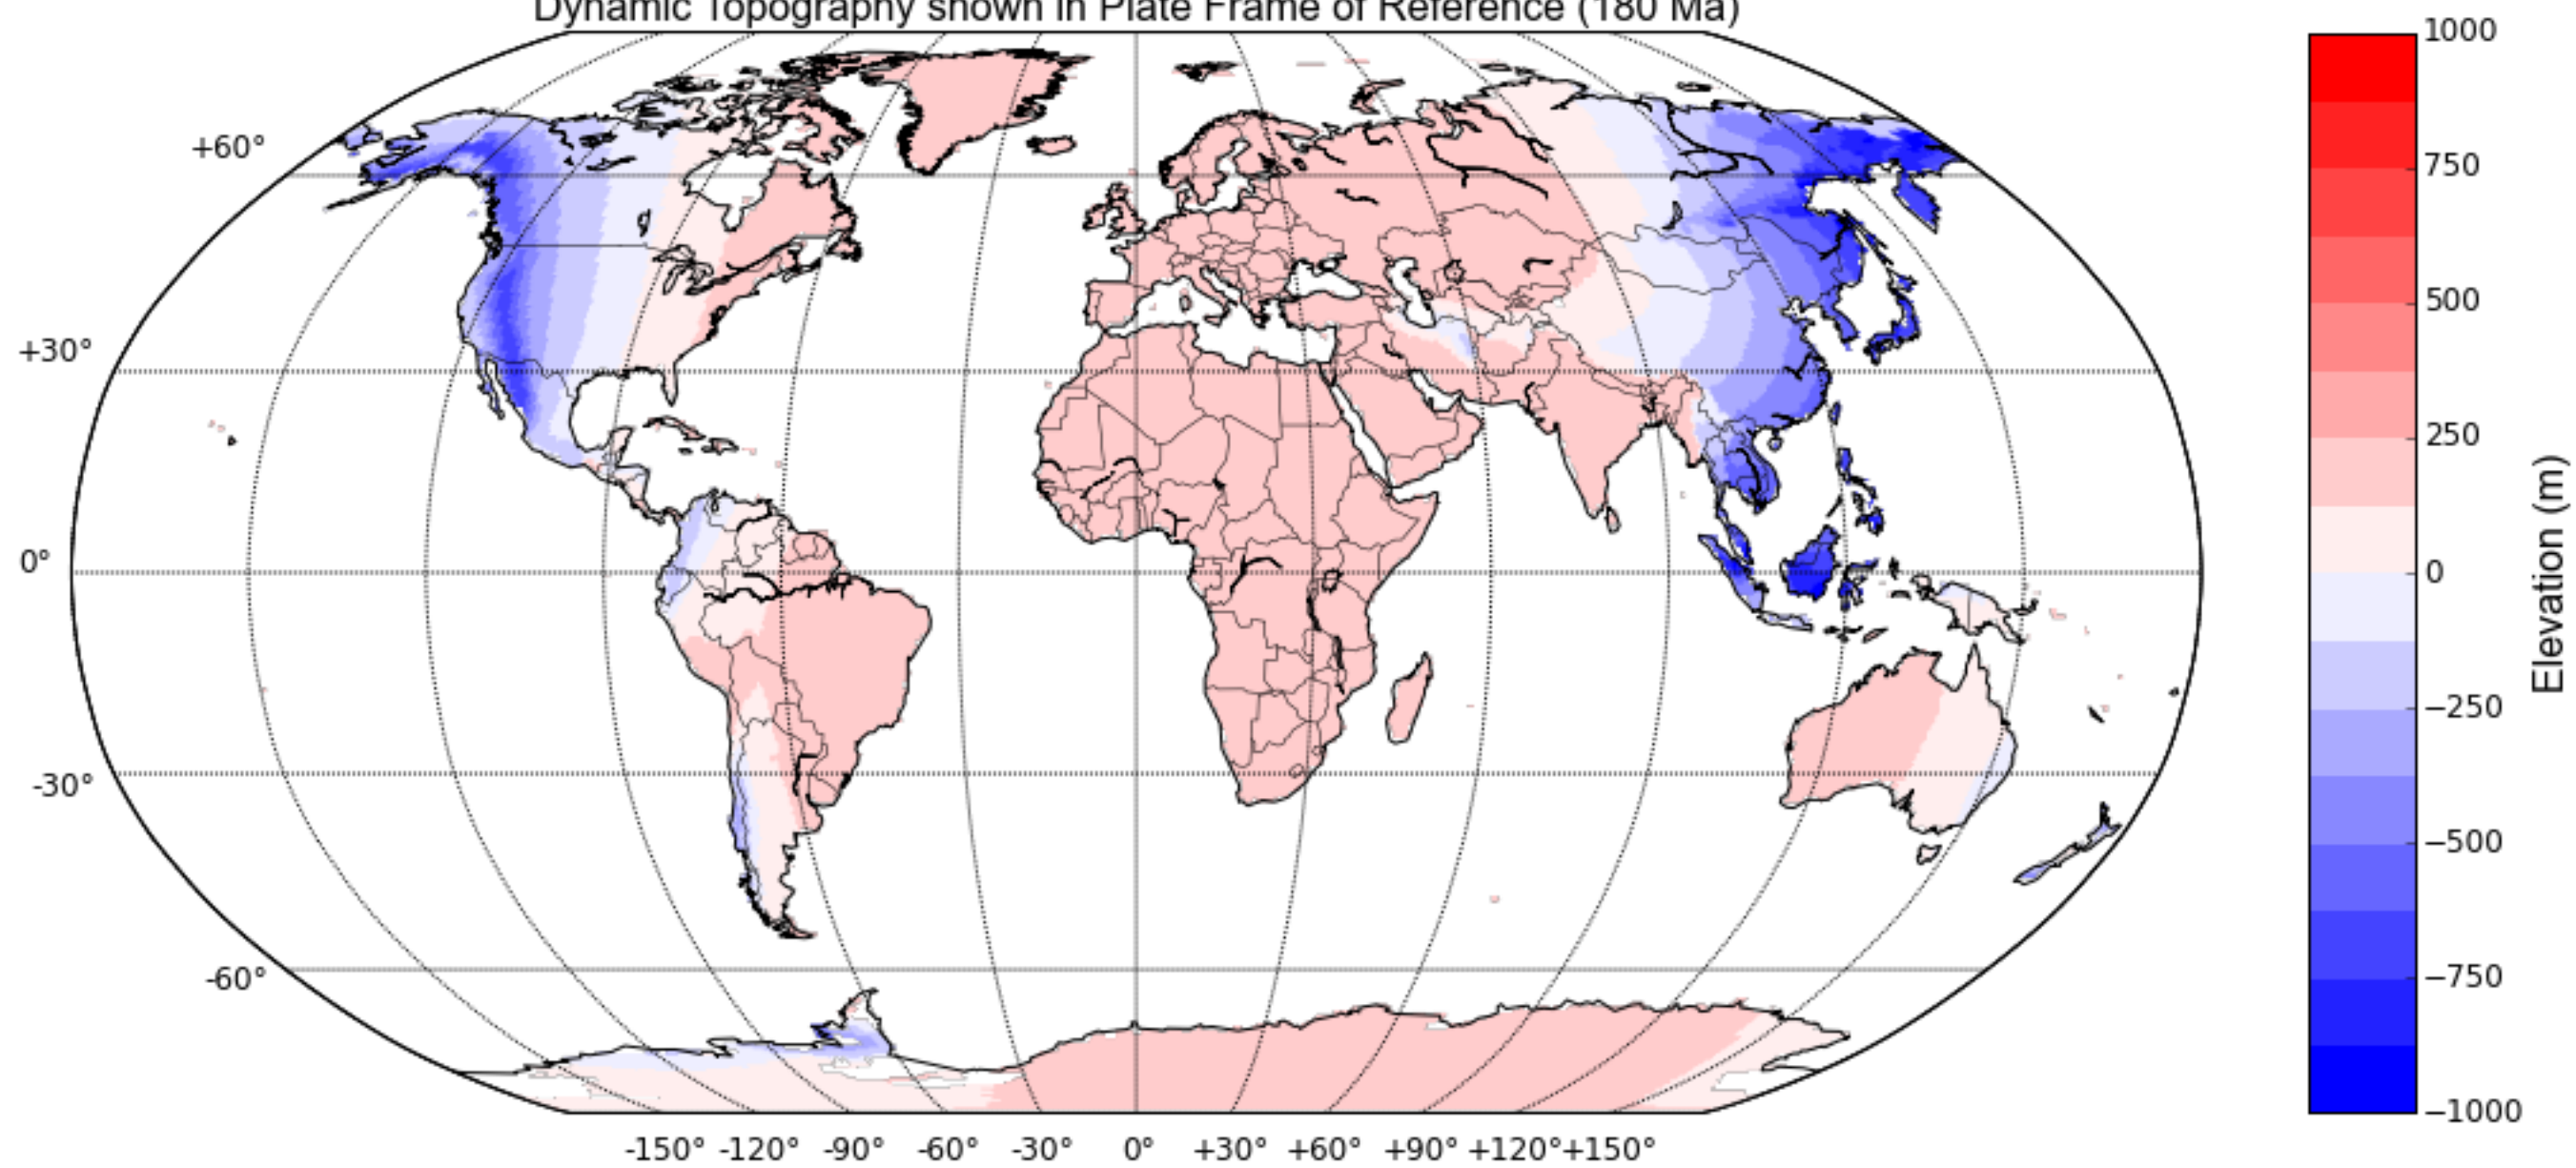



Dynamic Topography shown in Plate Frame of Reference (170 Ma)

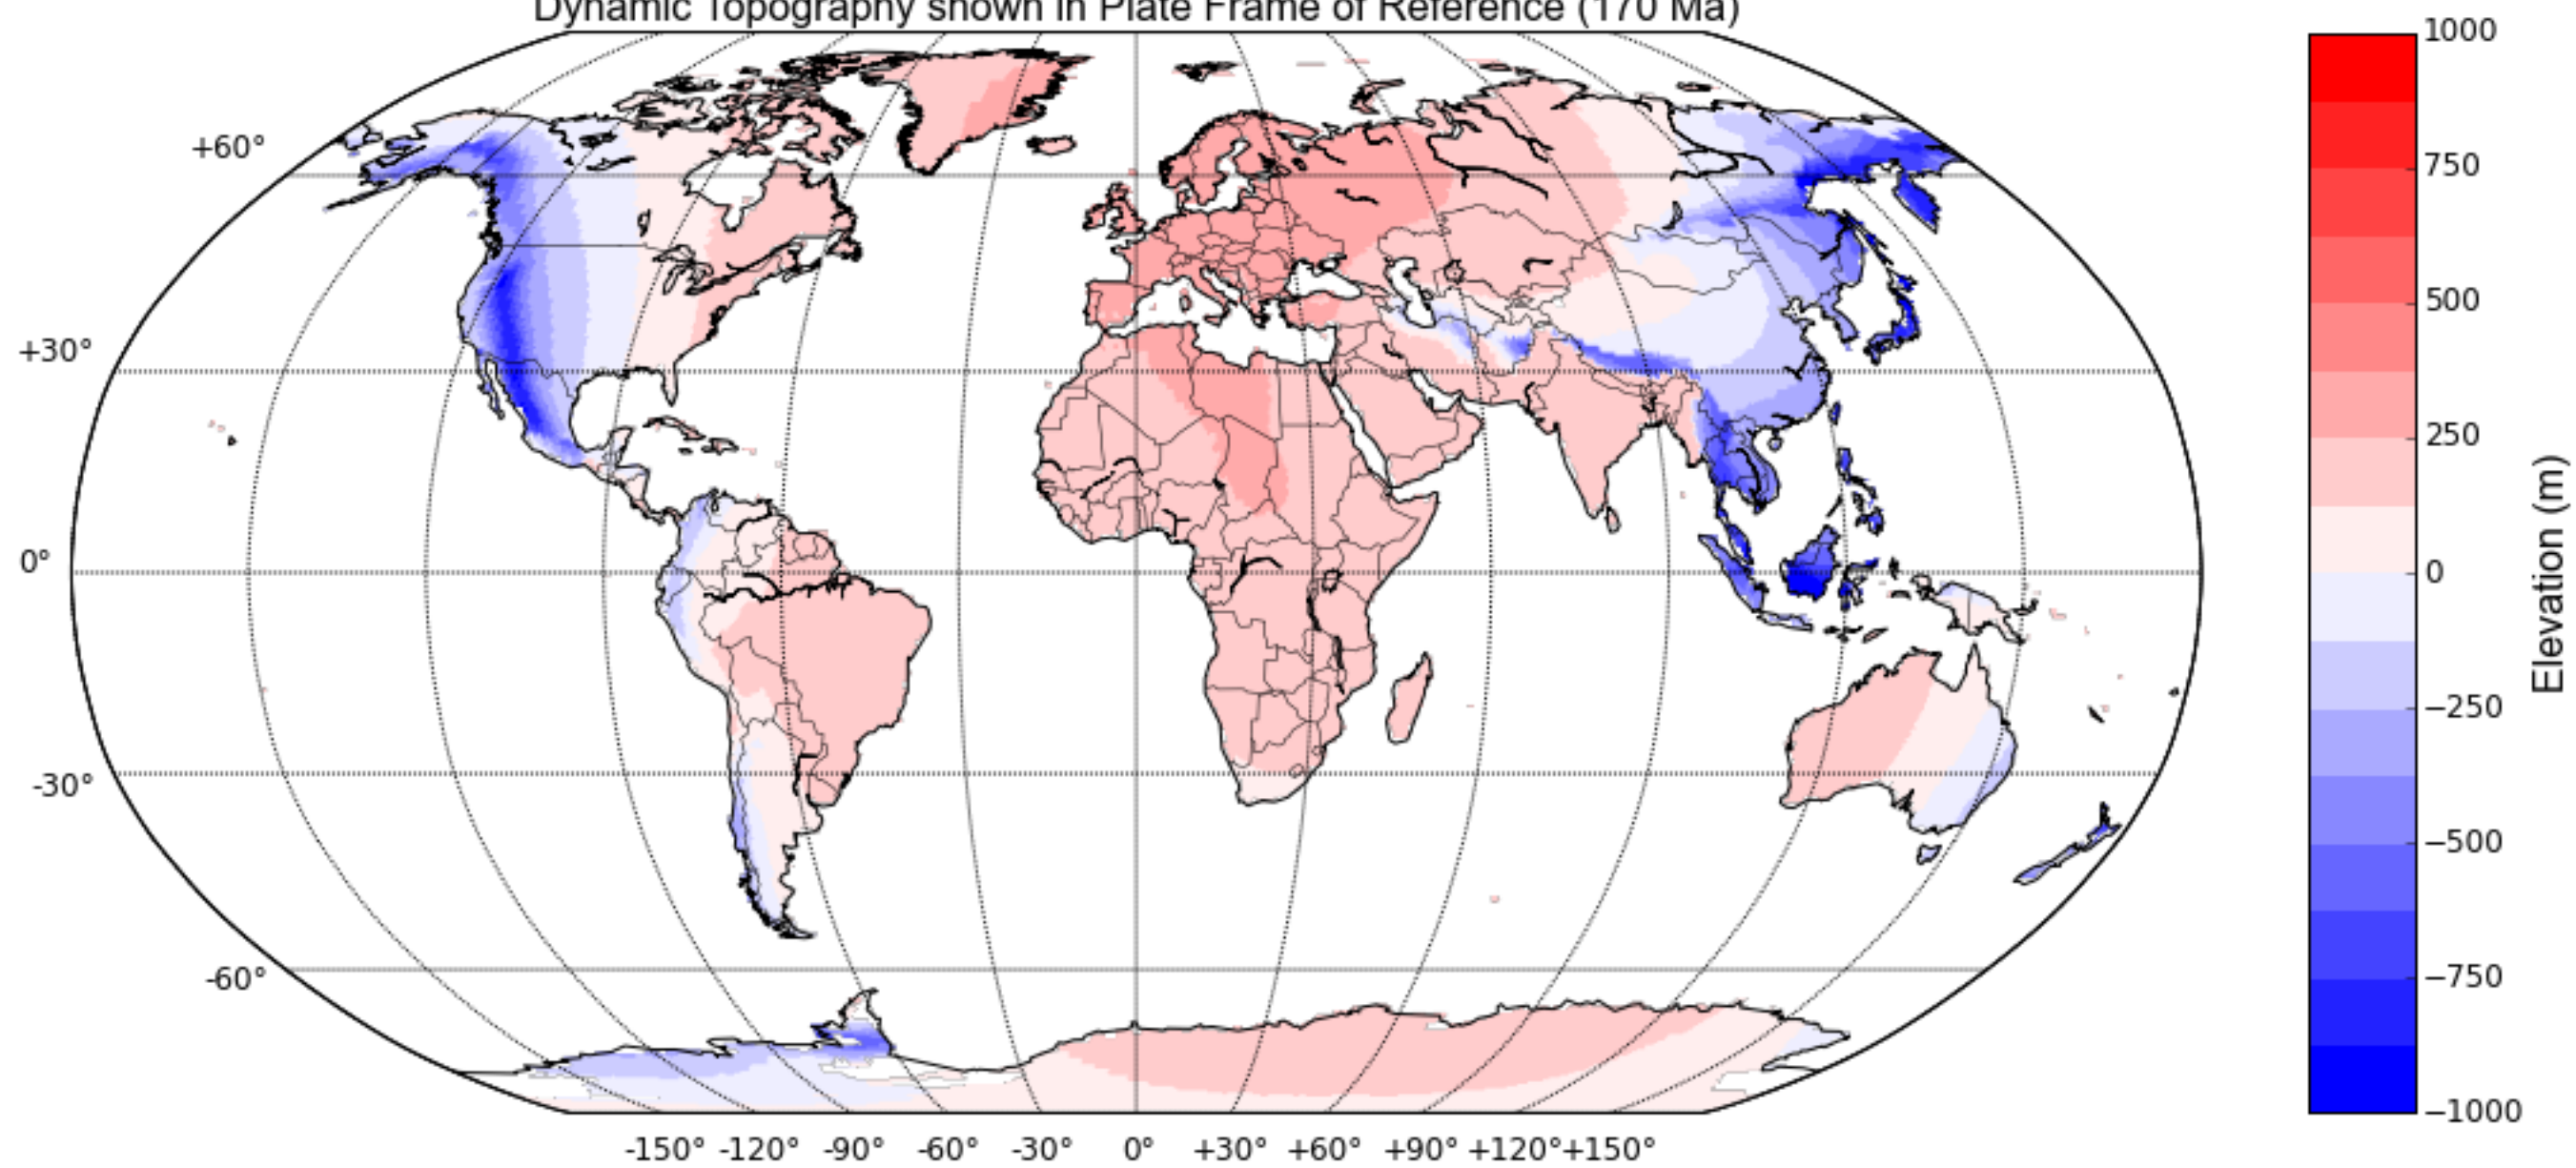

Dynamic Topography shown in Plate Frame of Reference (160 Ma)

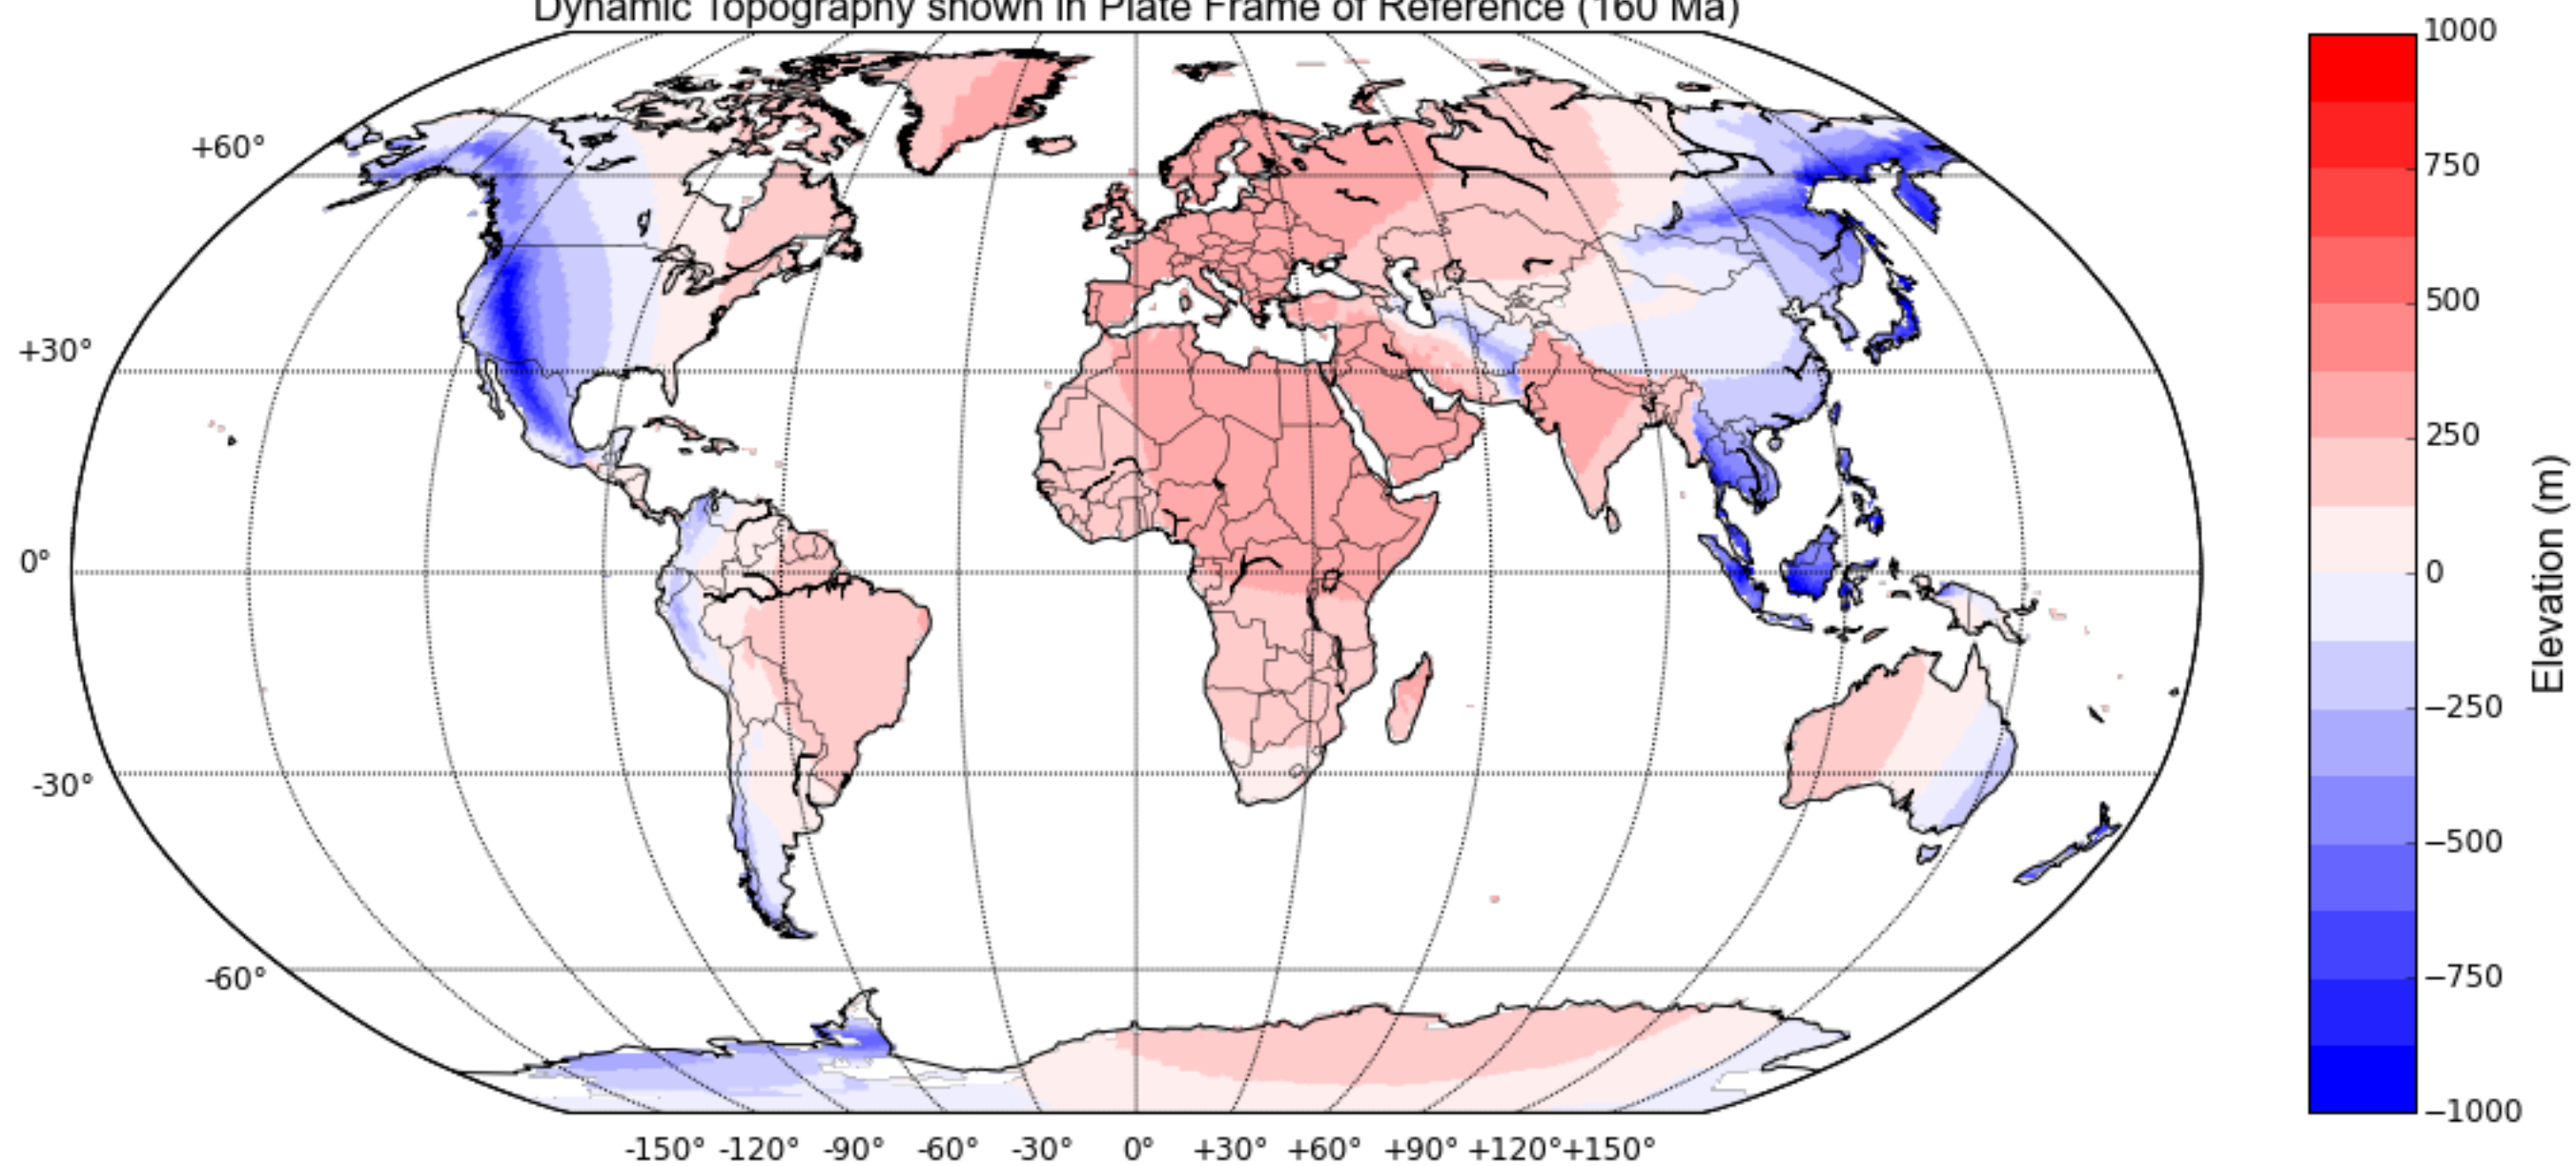

Dynamic Topography shown in Plate Frame of Reference (150 Ma)

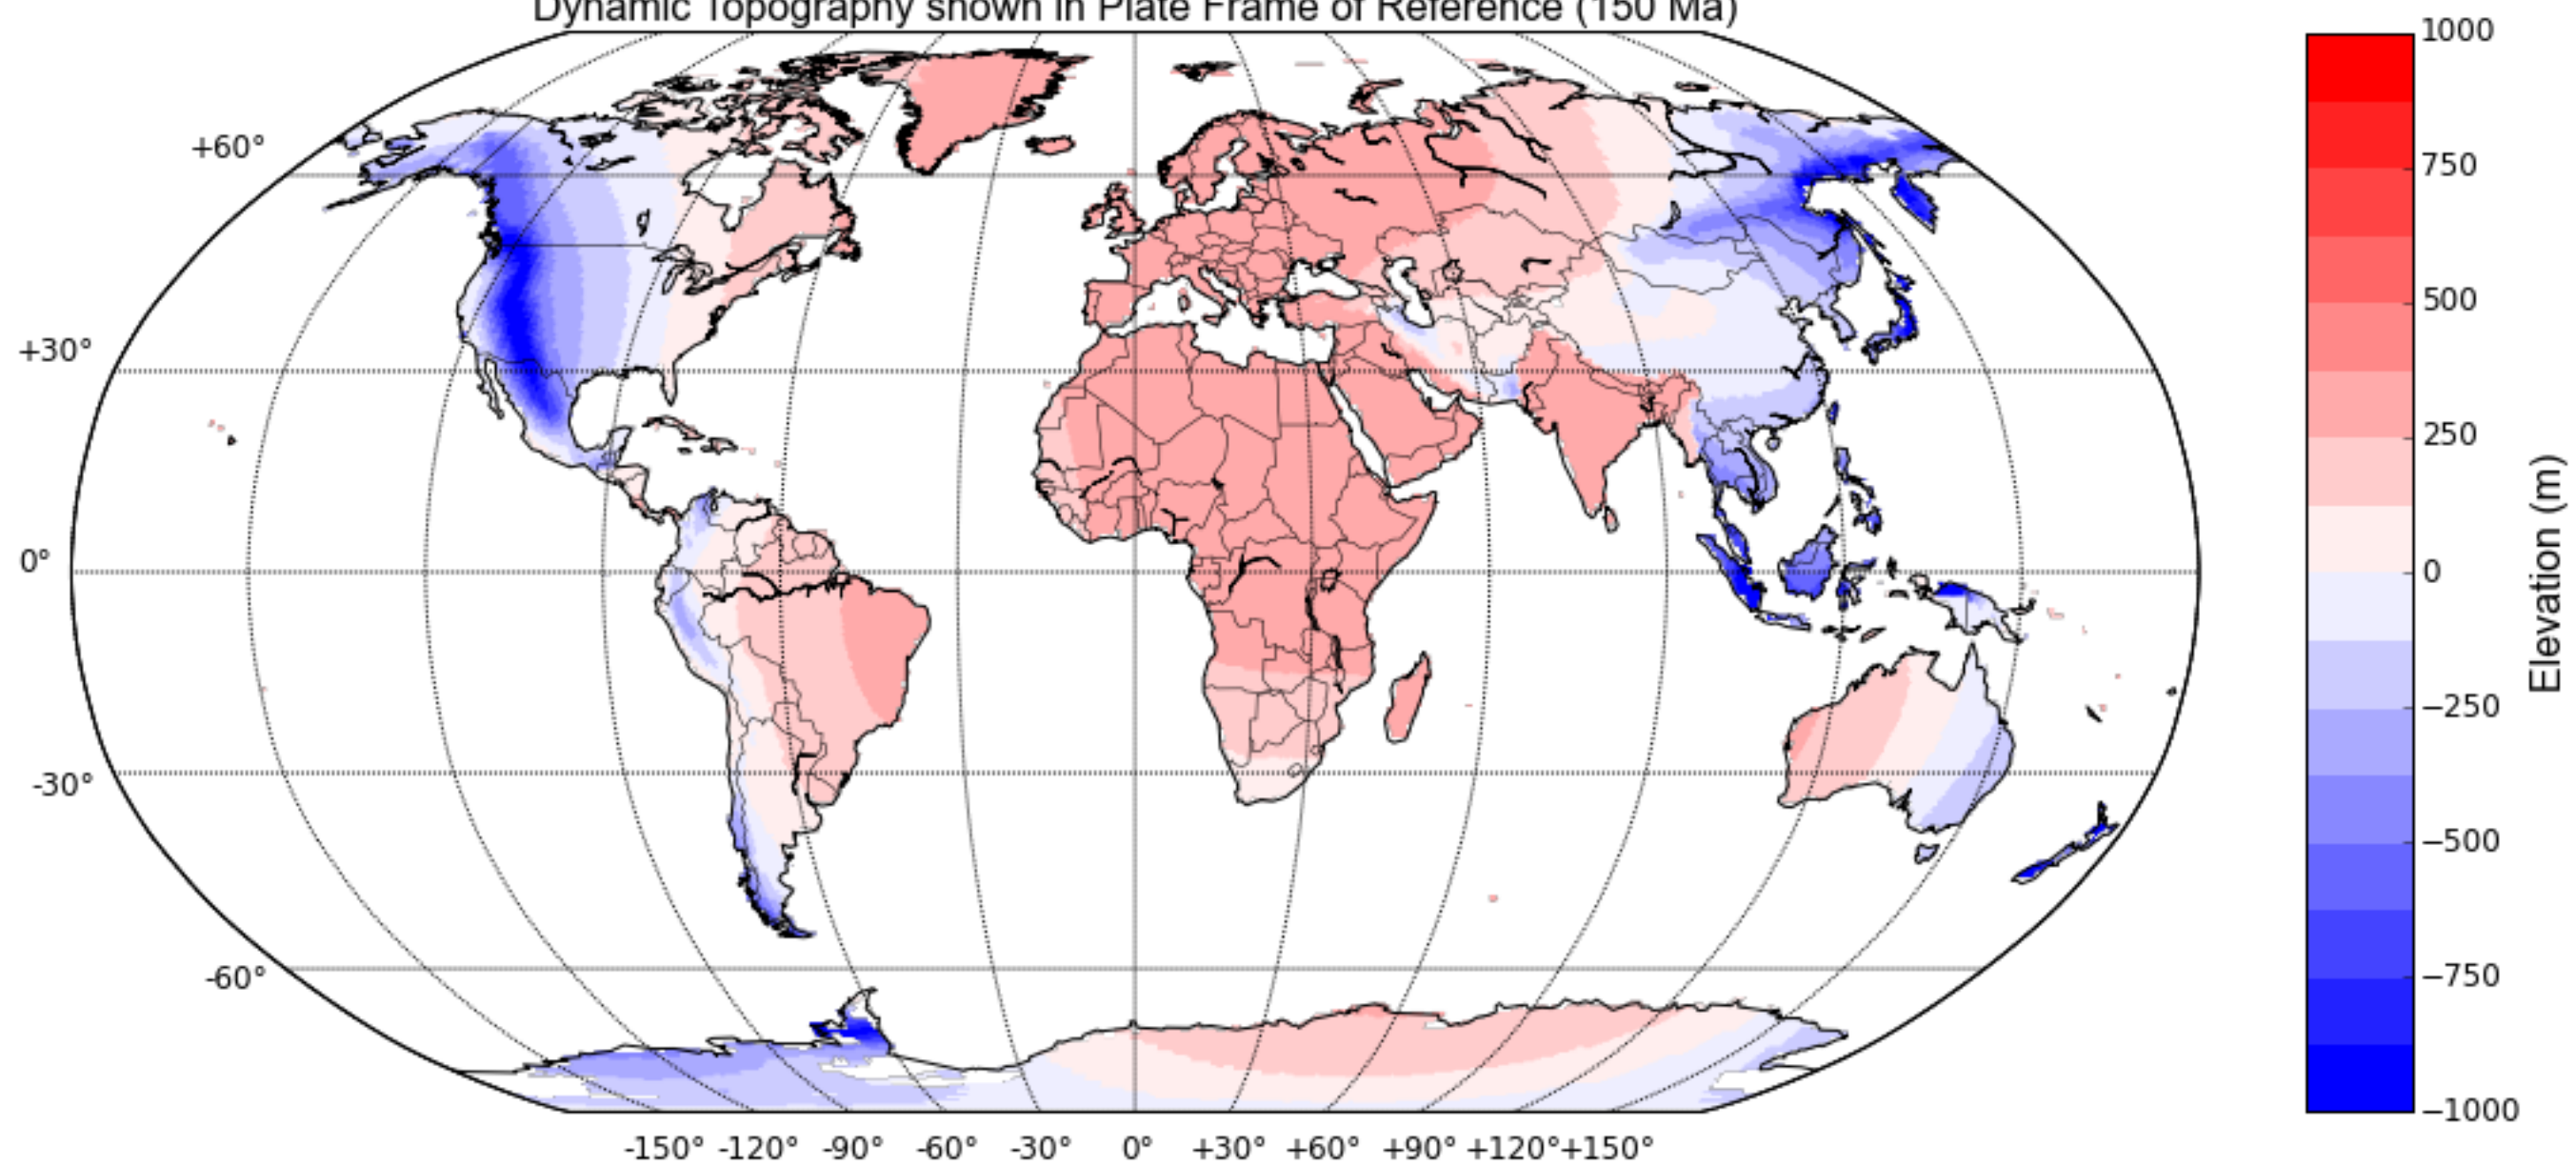



Dynamic Topography shown in Plate Frame of Reference (140 Ma)

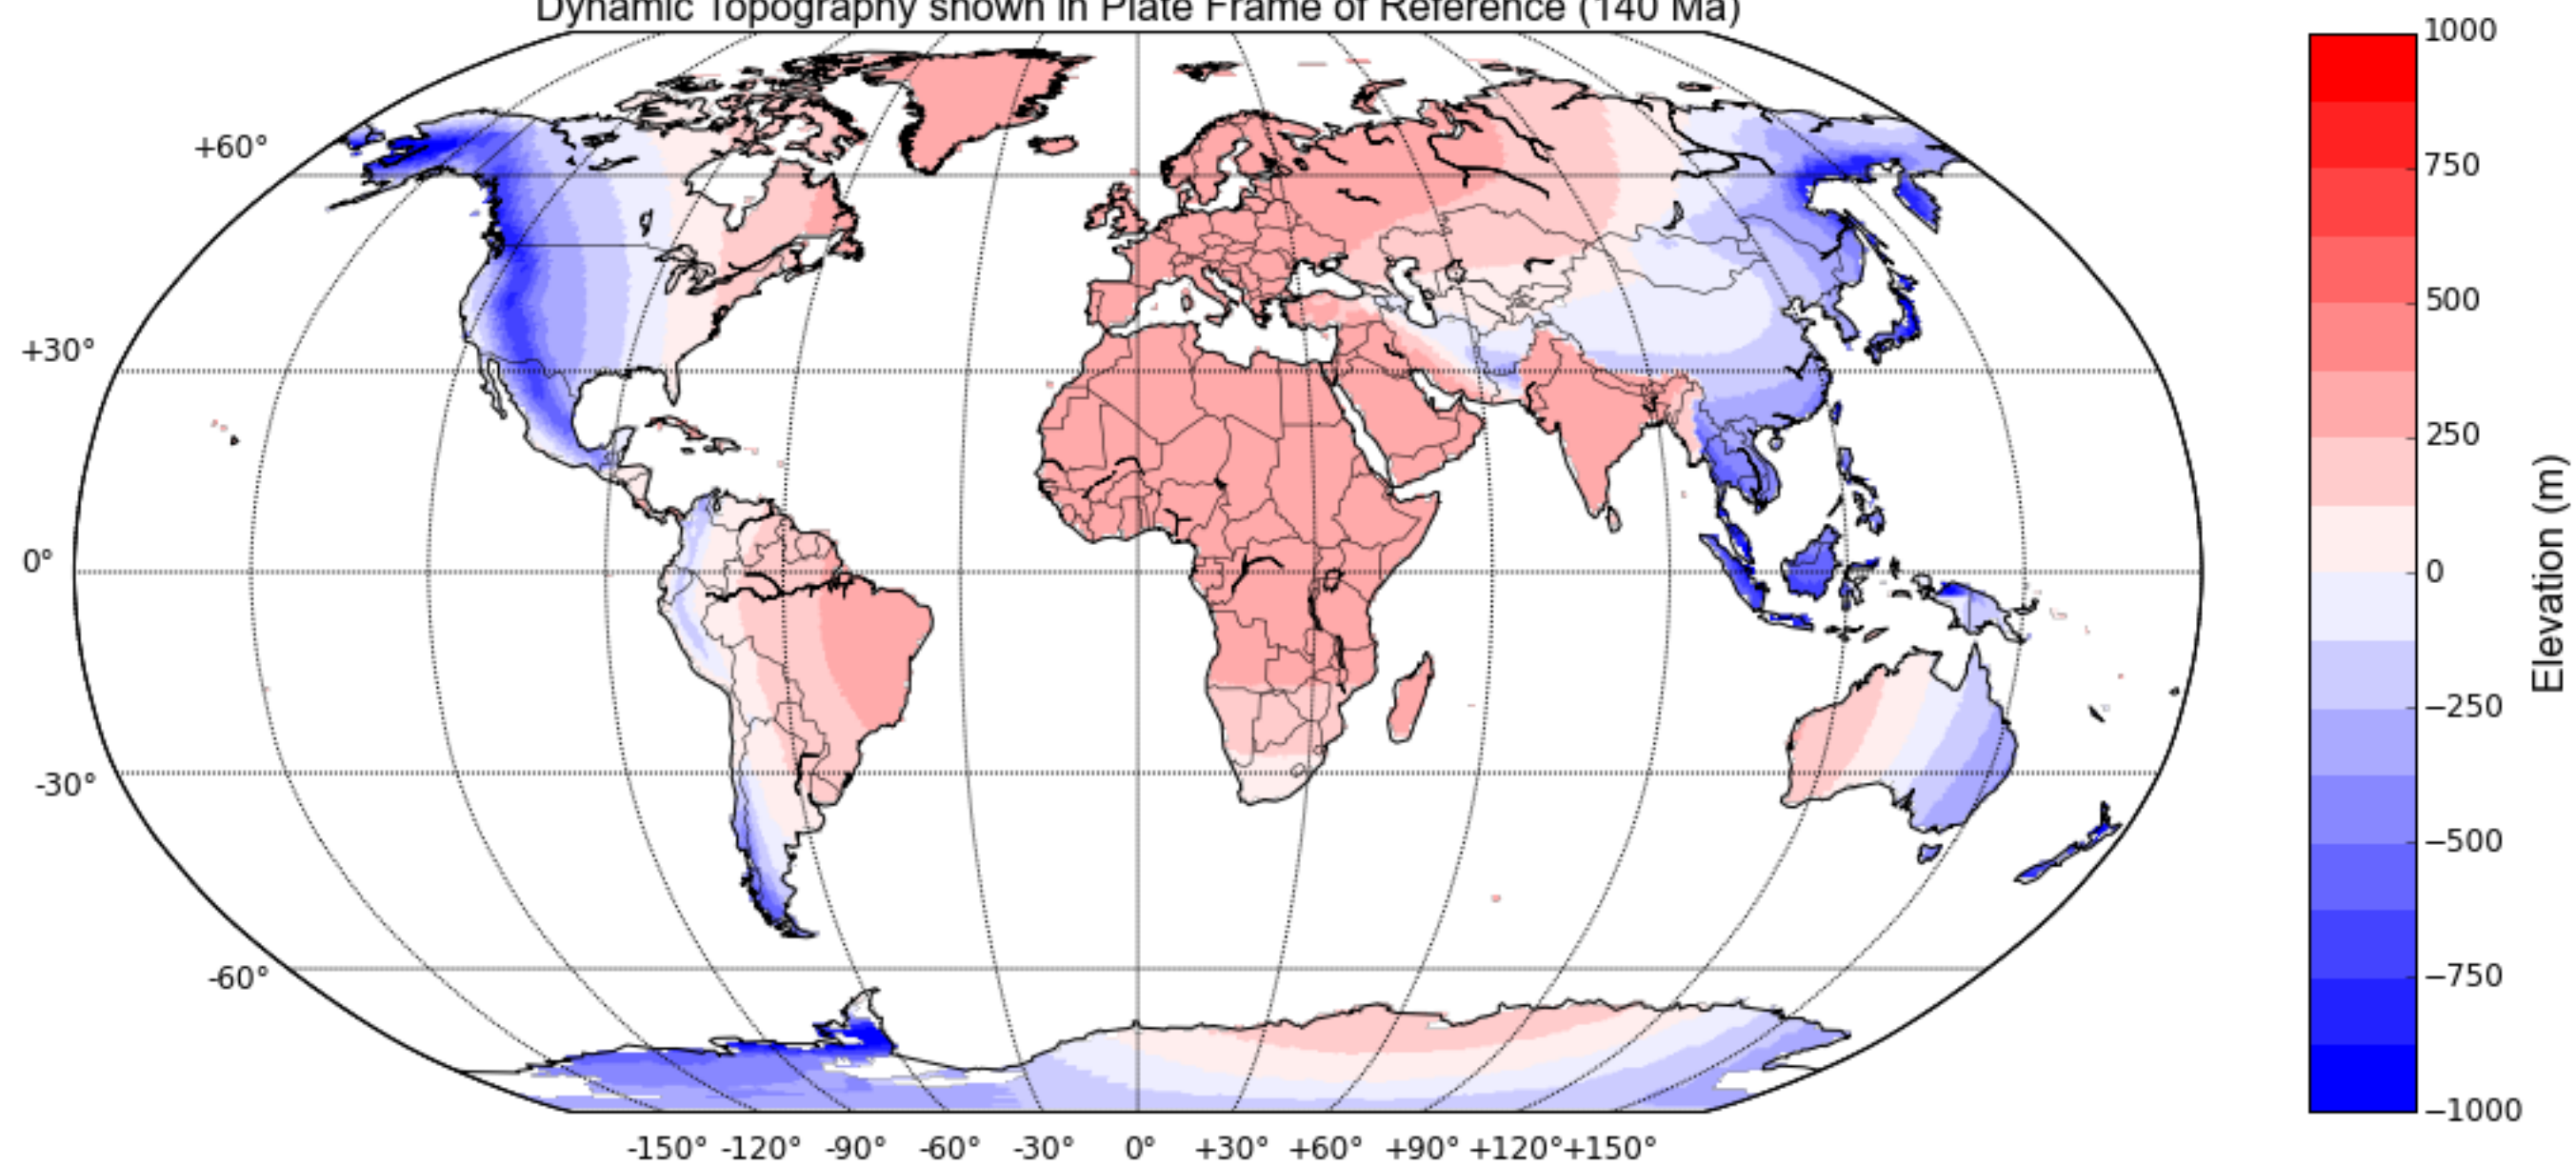

Dynamic Topography shown in Plate Frame of Reference (130 Ma)

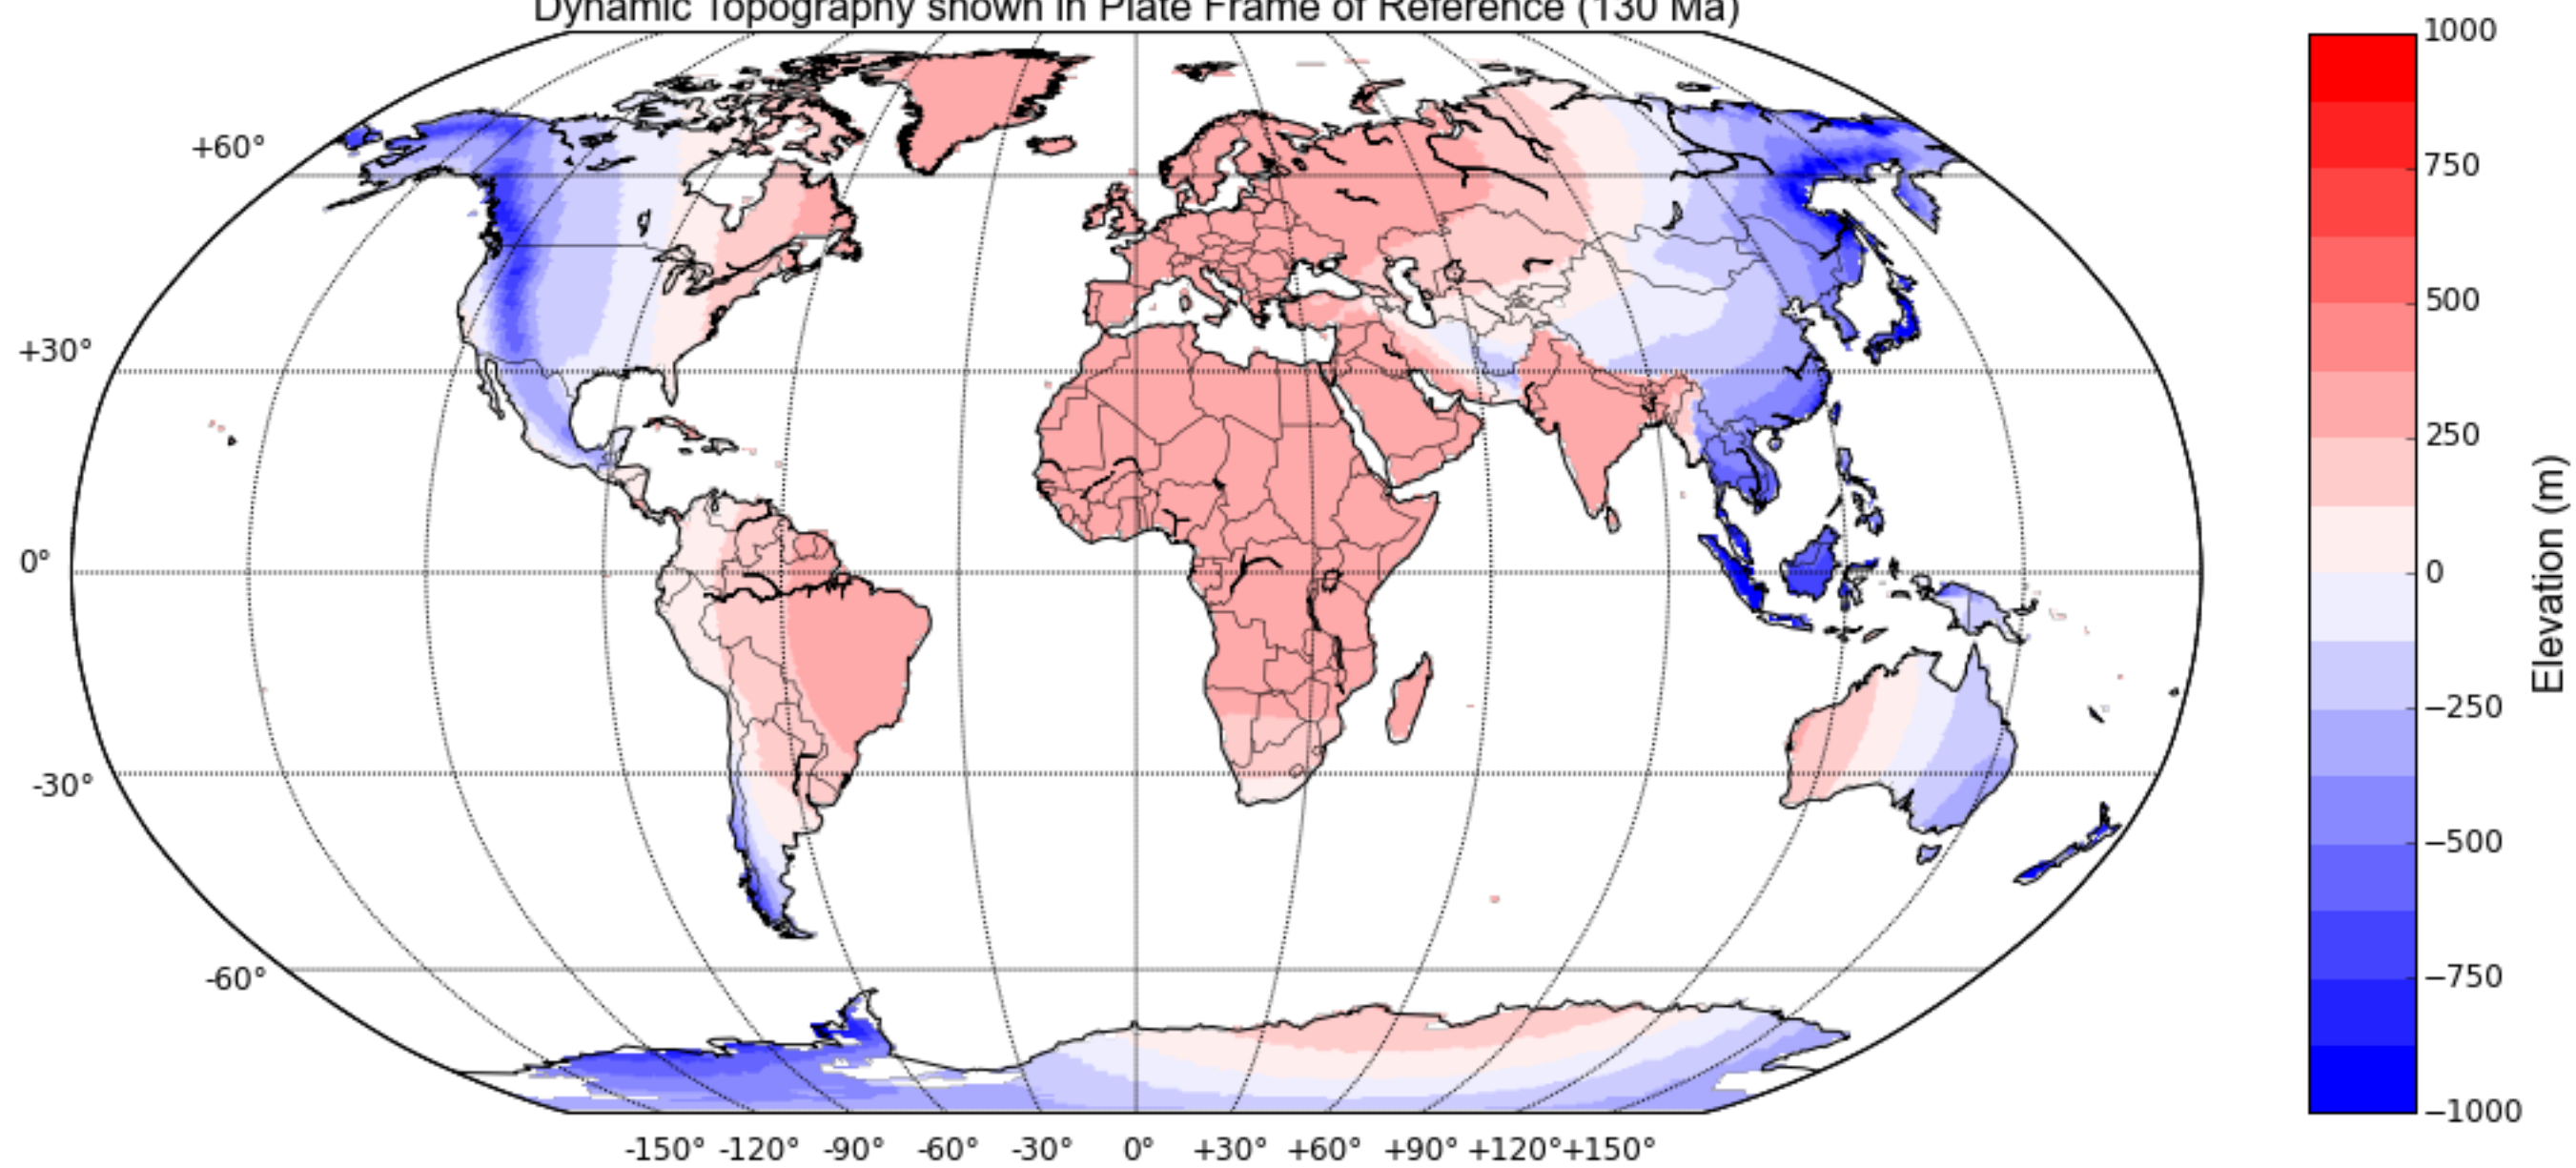



Dynamic Topography shown in Plate Frame of Reference (120 Ma)

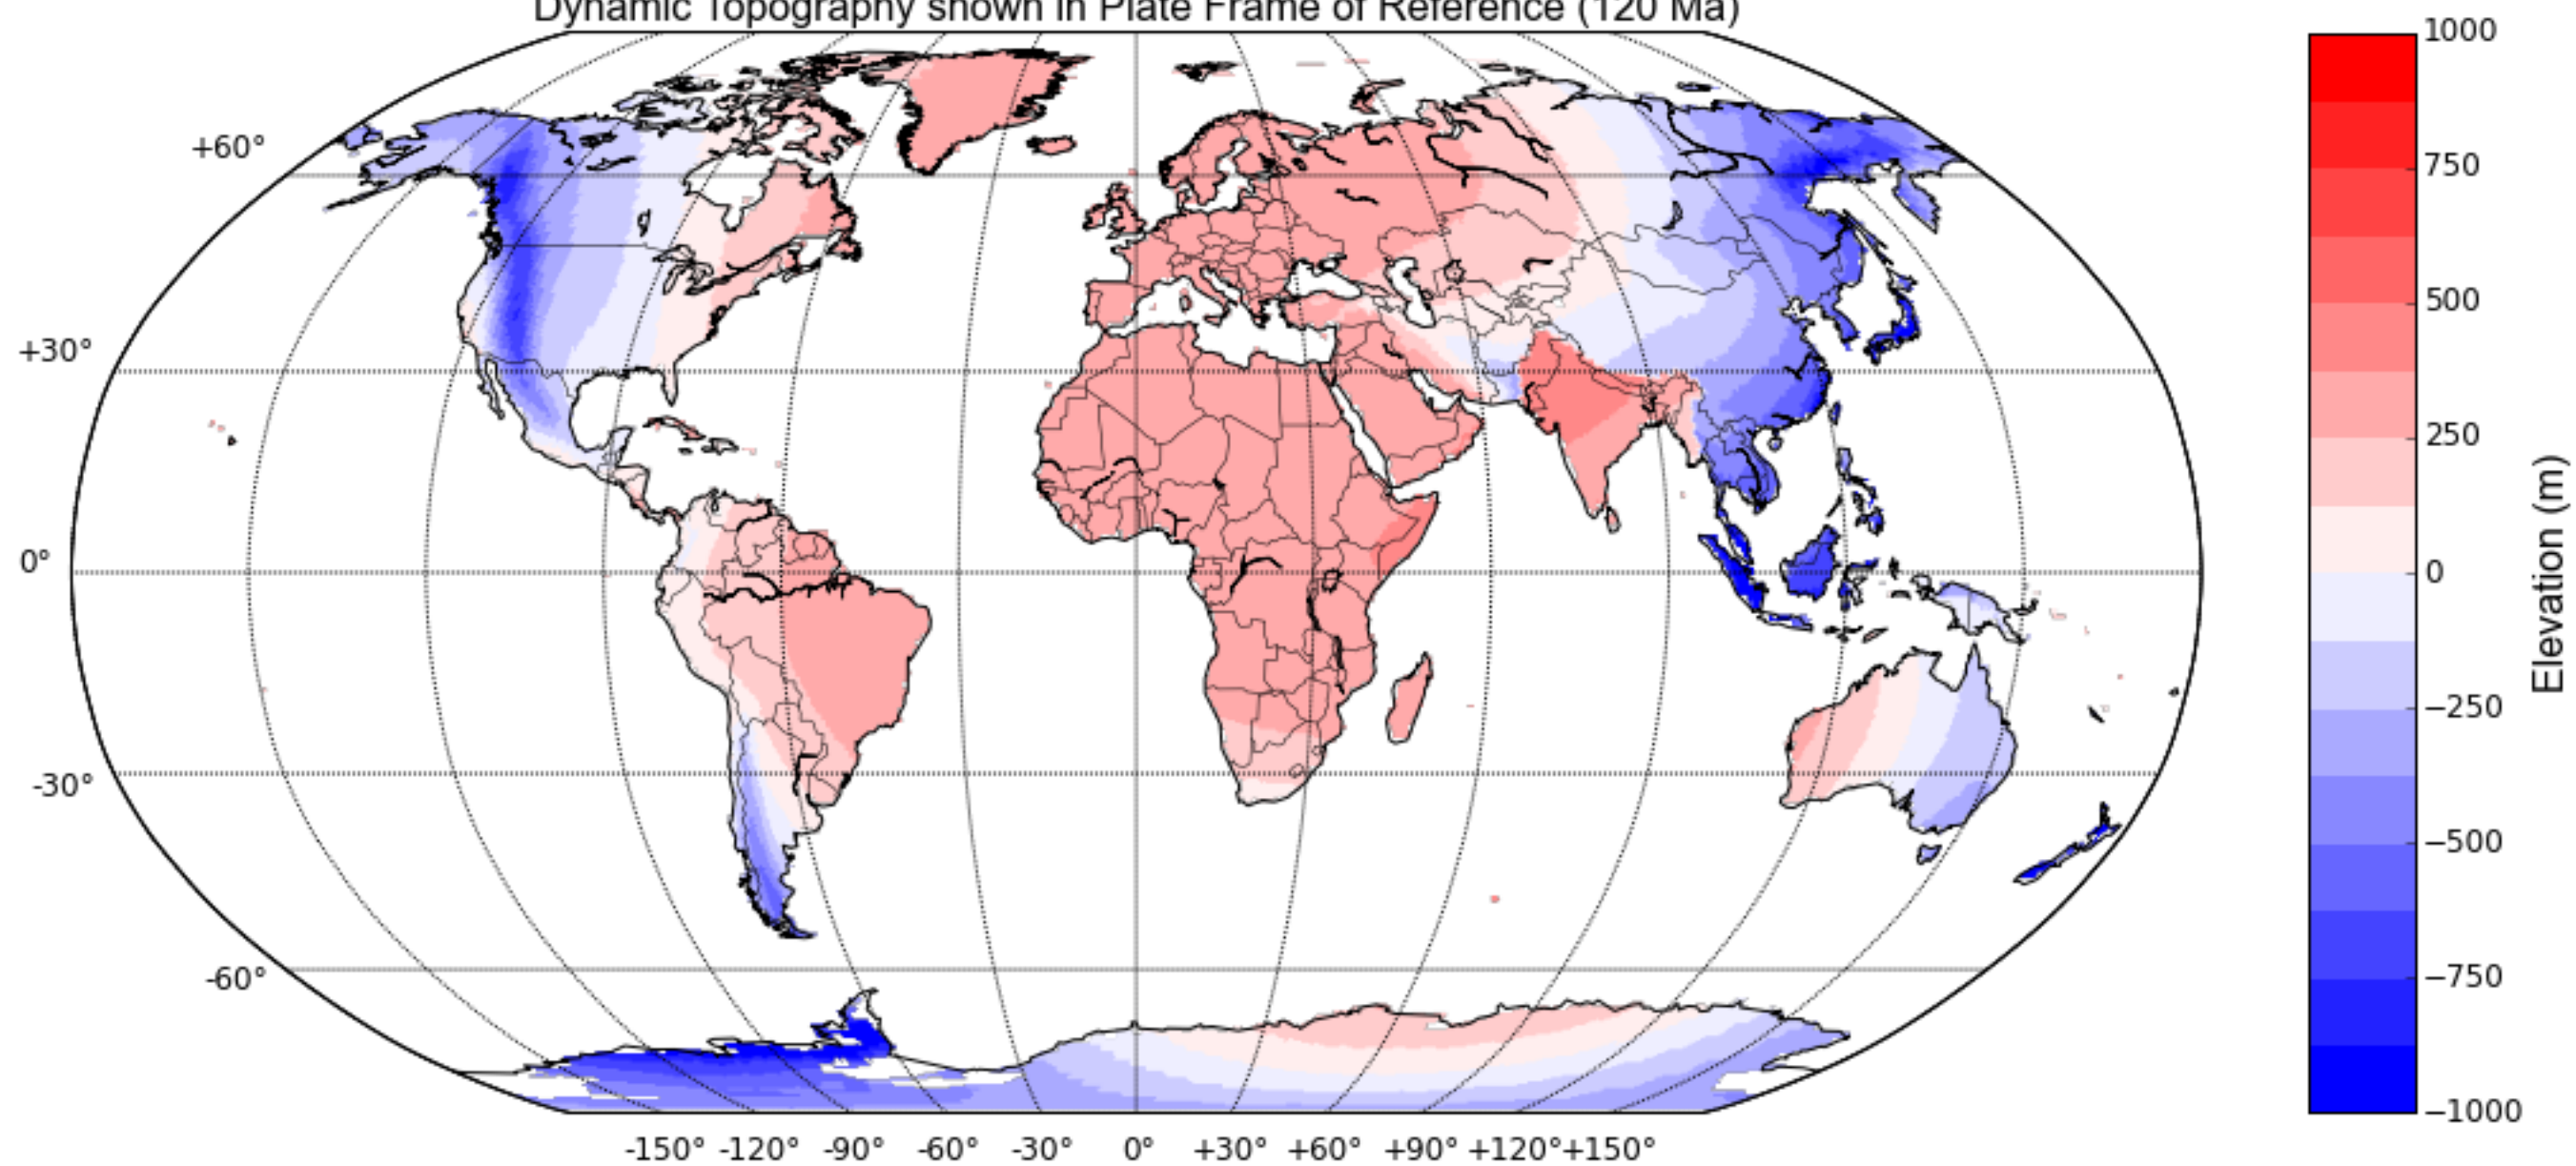

Dynamic Topography shown in Plate Frame of Reference (110 Ma)

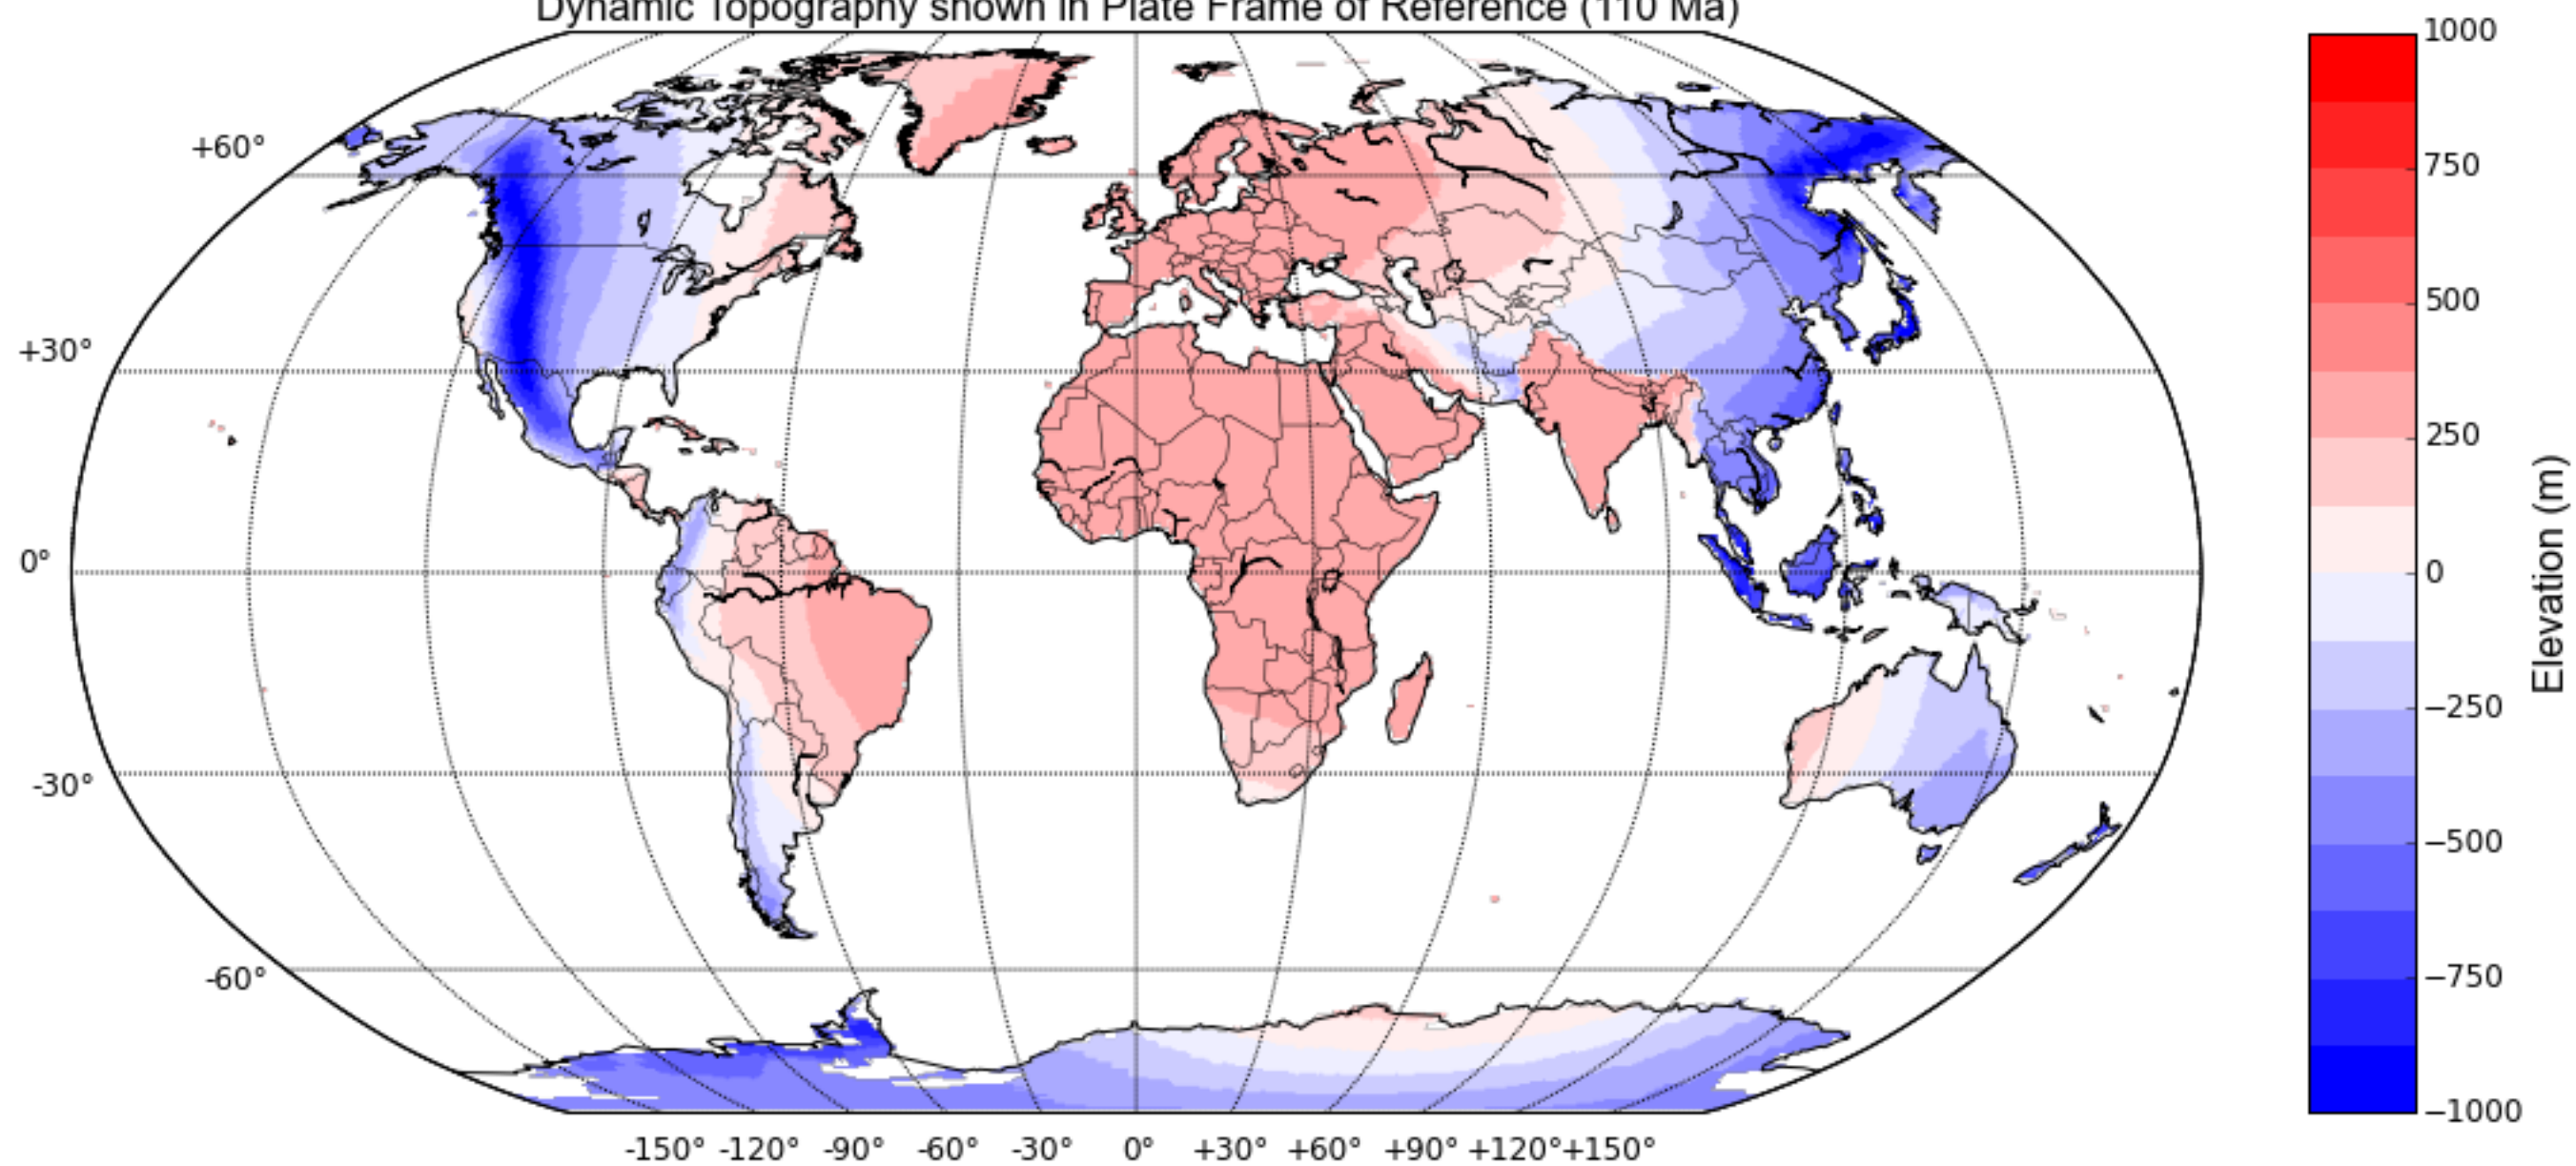

Dynamic Topography shown in Plate Frame of Reference (100 Ma)

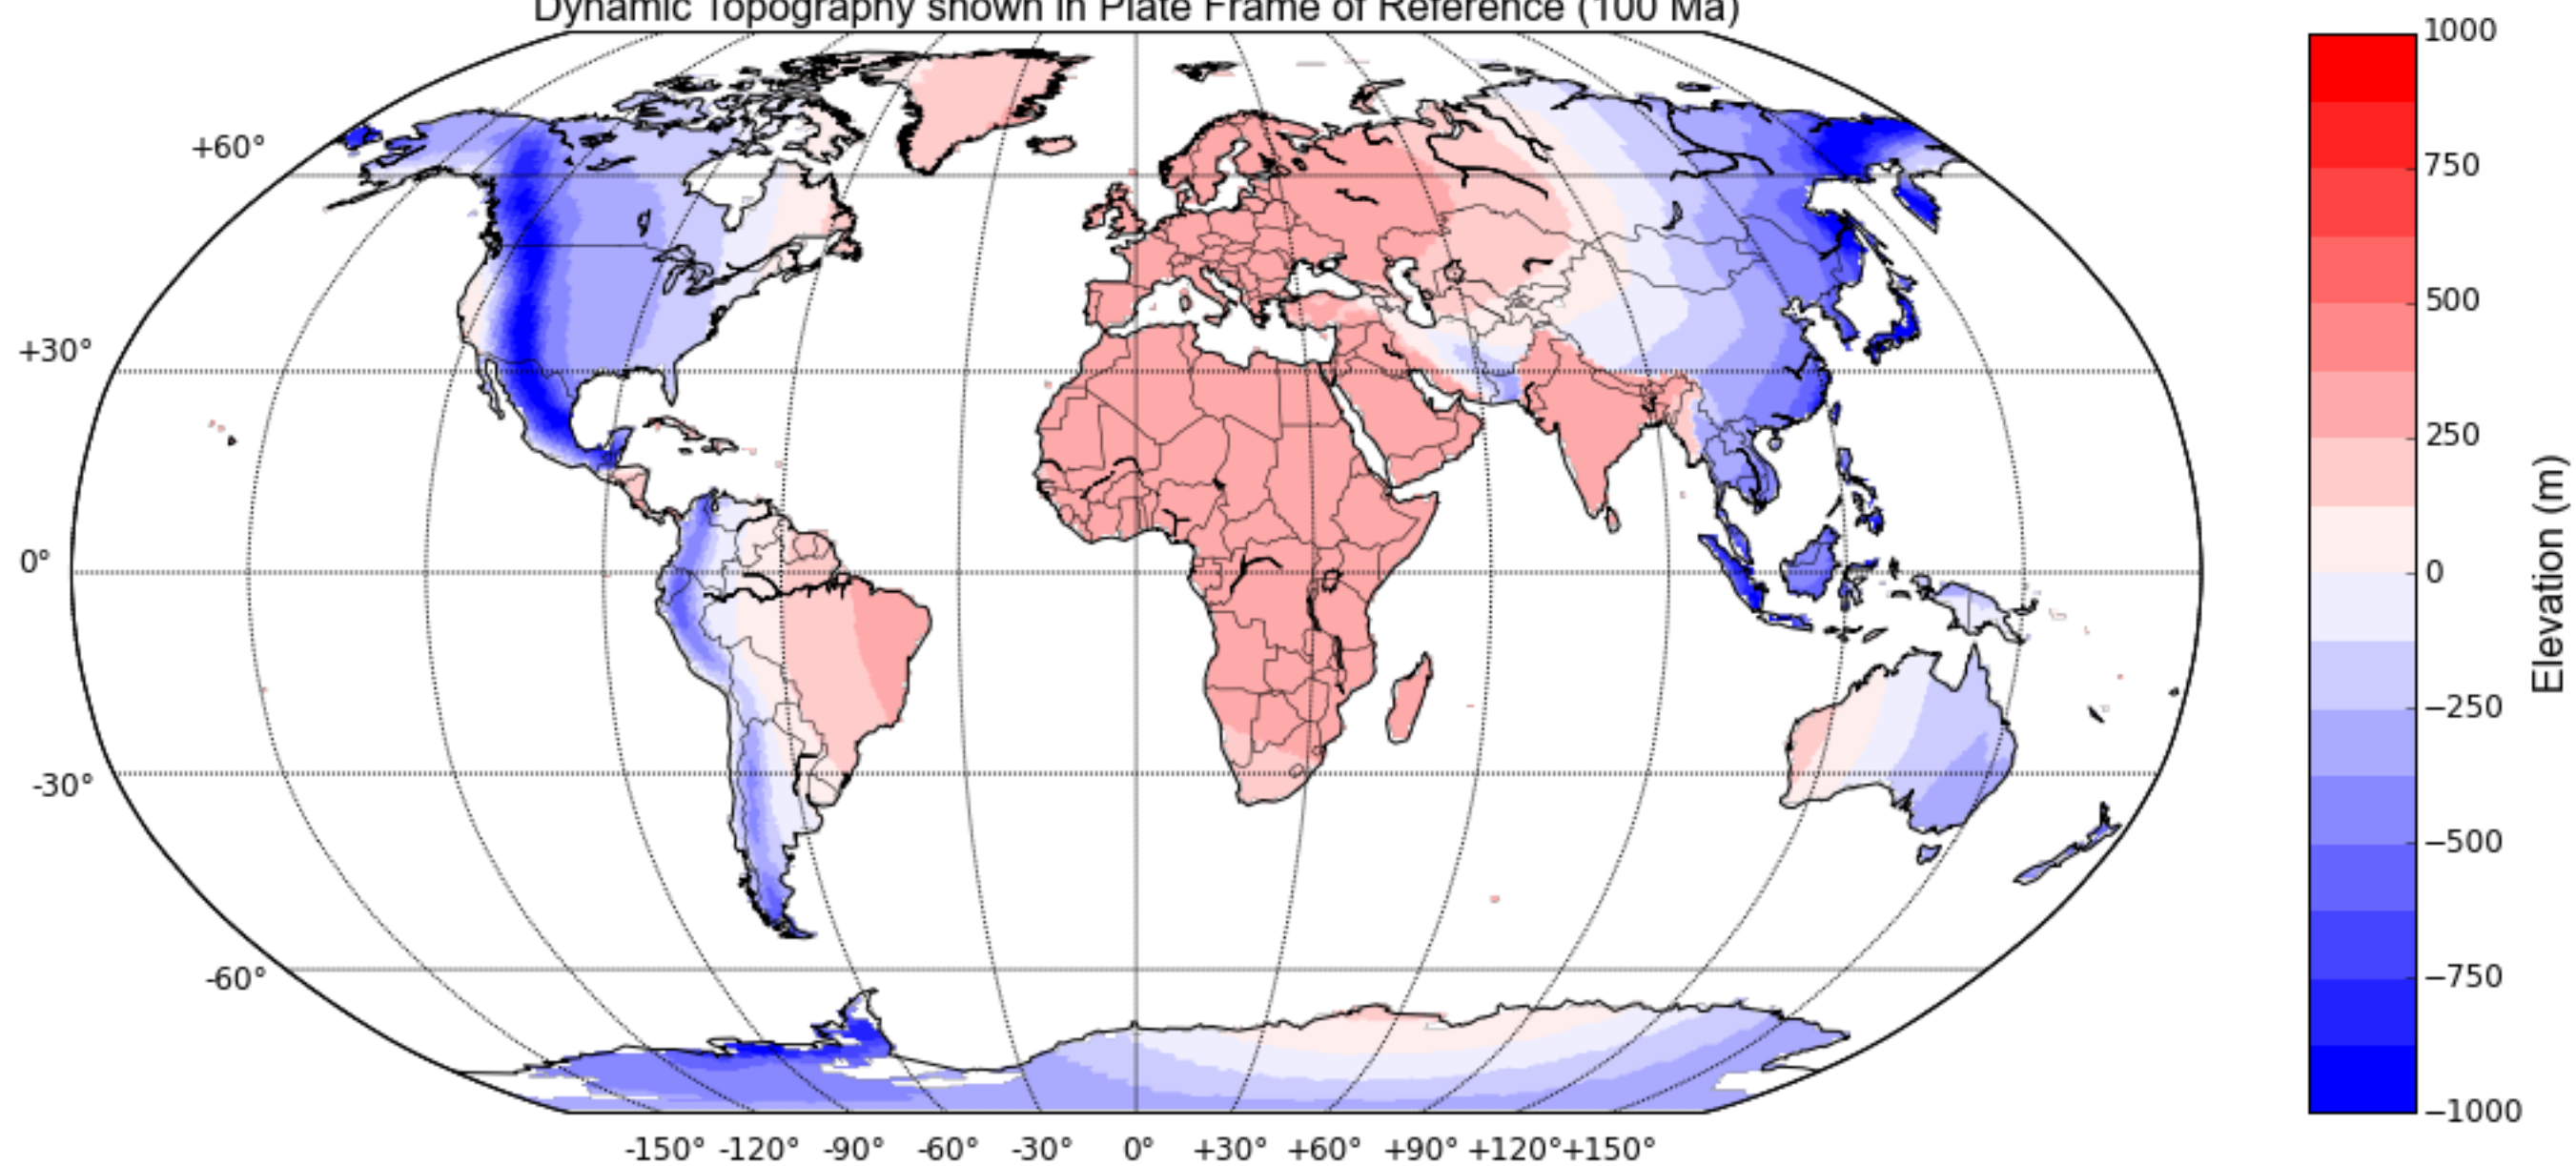



Dynamic Topography shown in Plate Frame of Reference (90 Ma)

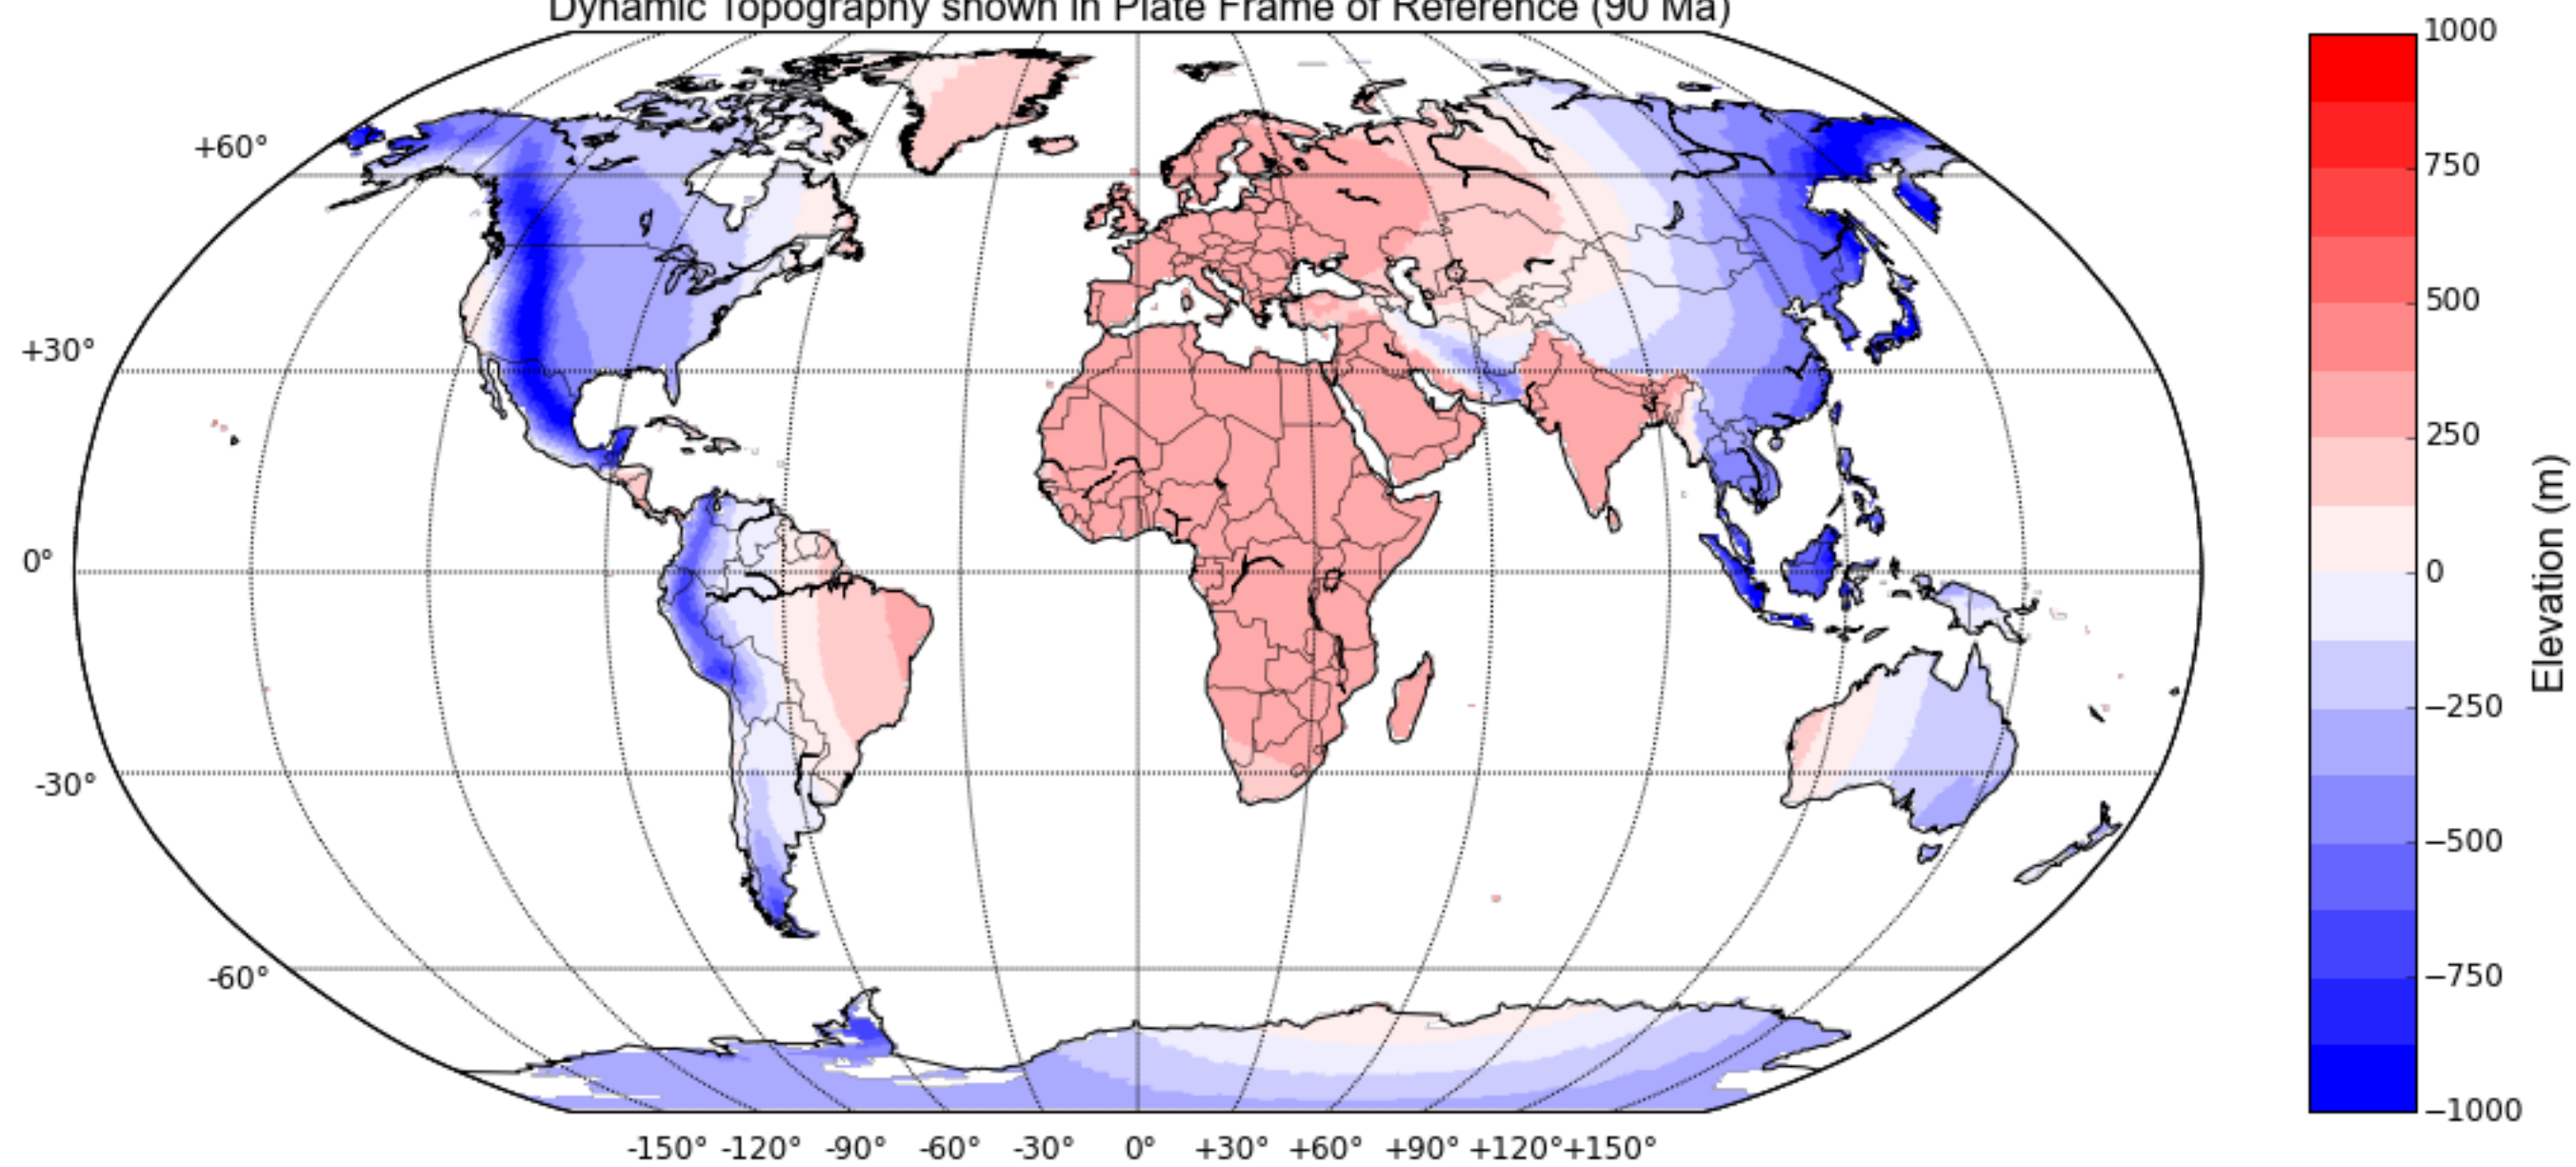

Dynamic Topography shown in Plate Frame of Reference (80 Ma)

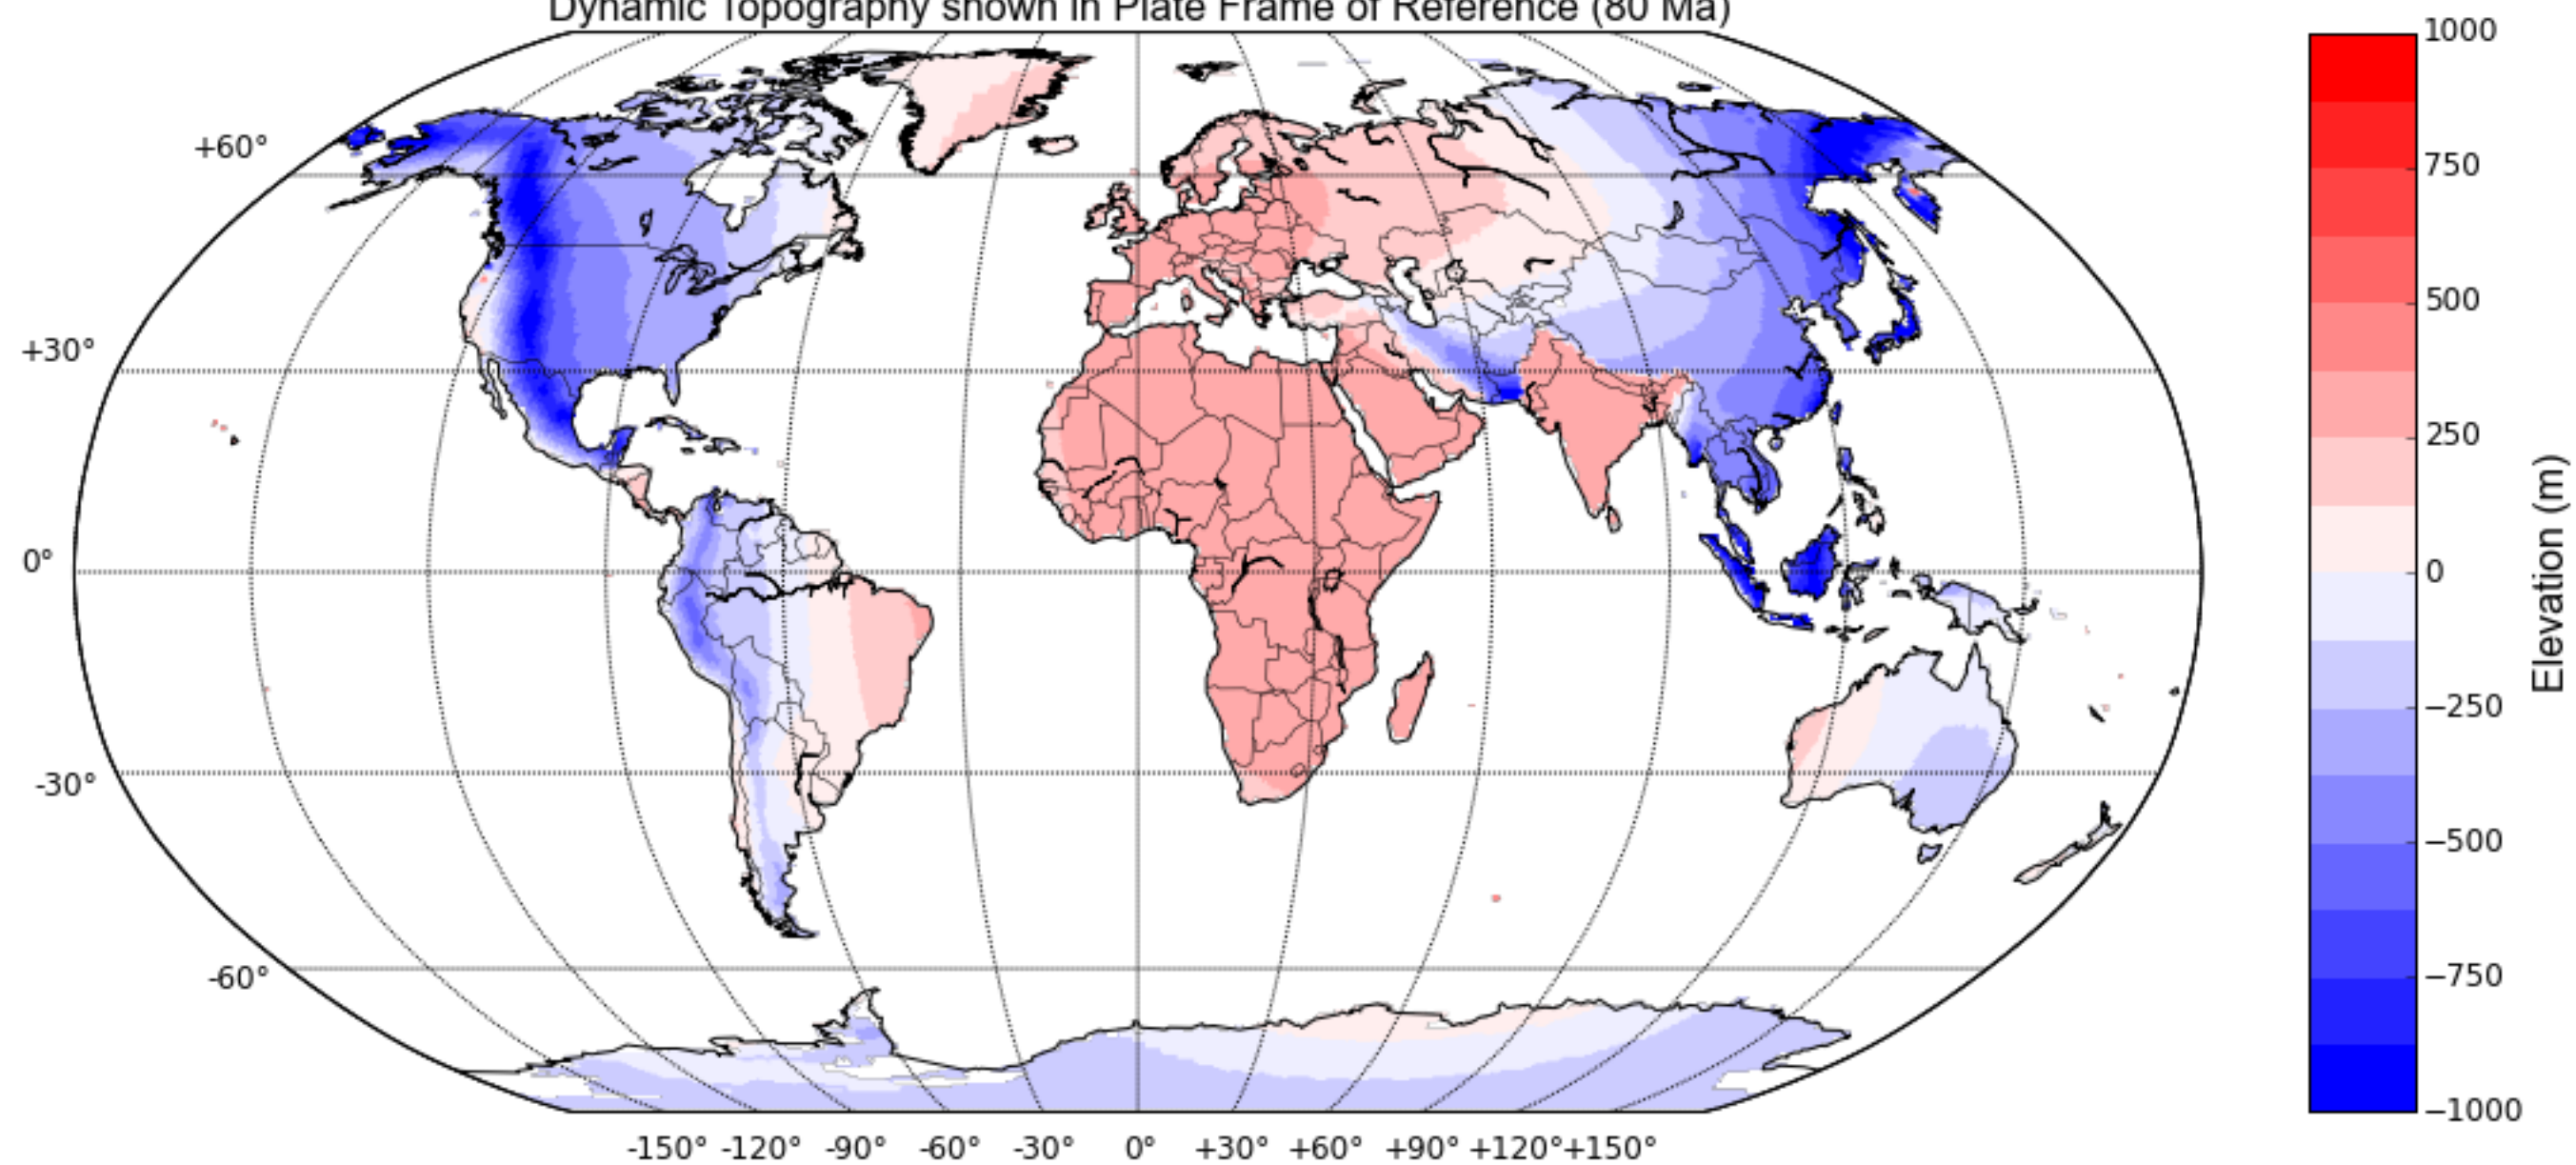

Dynamic Topography shown in Plate Frame of Reference (70 Ma)

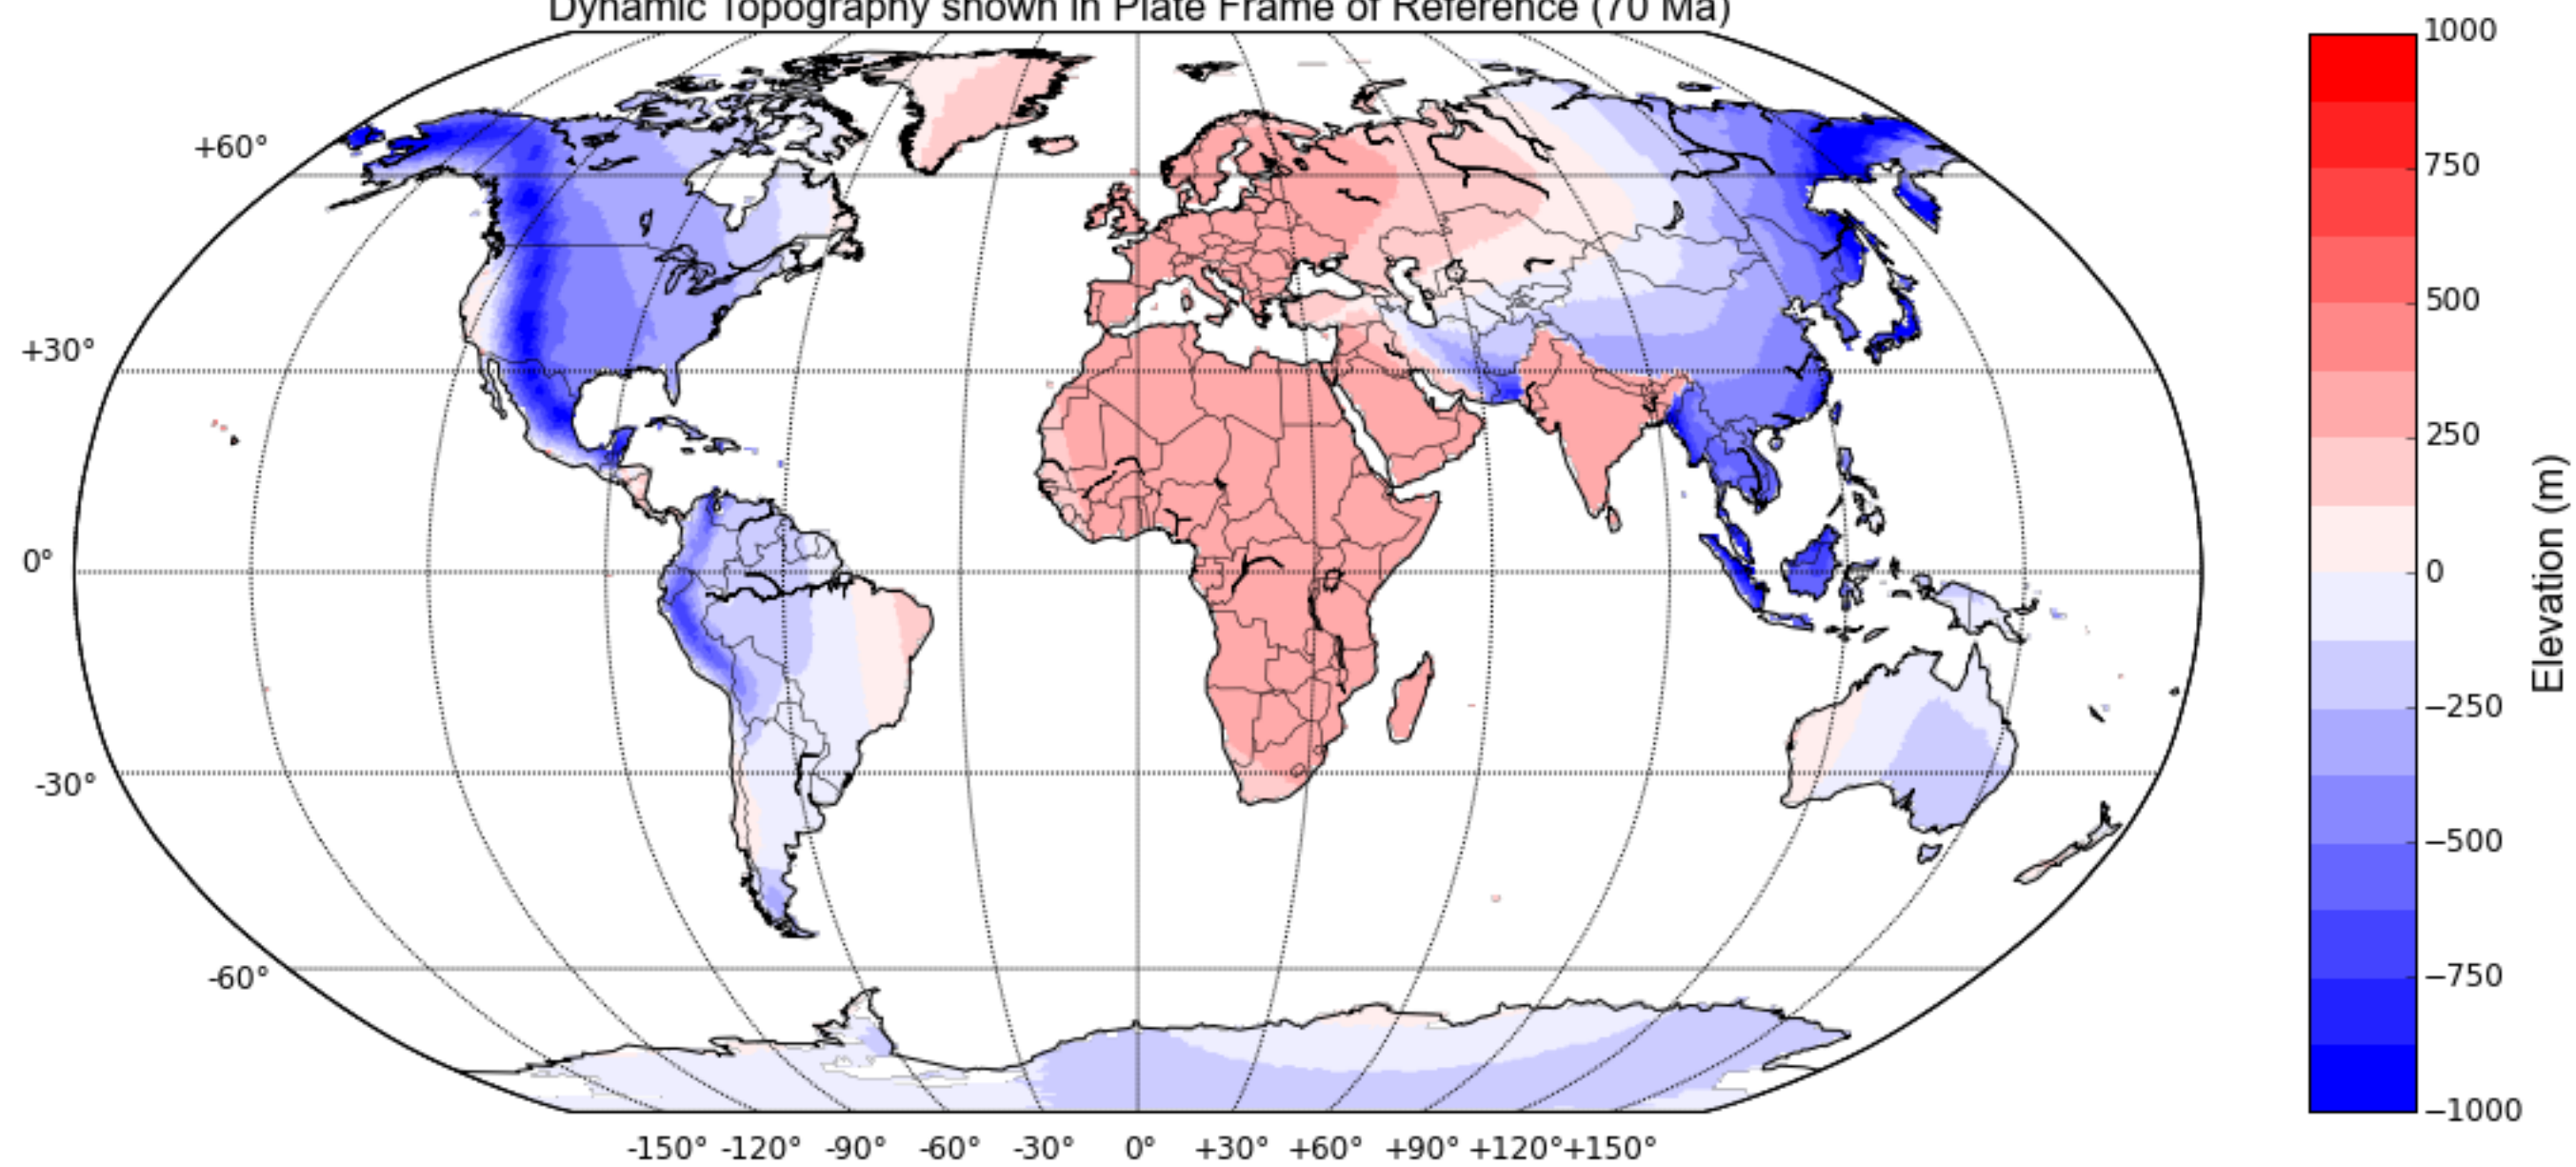



Dynamic Topography shown in Plate Frame of Reference (60 Ma)

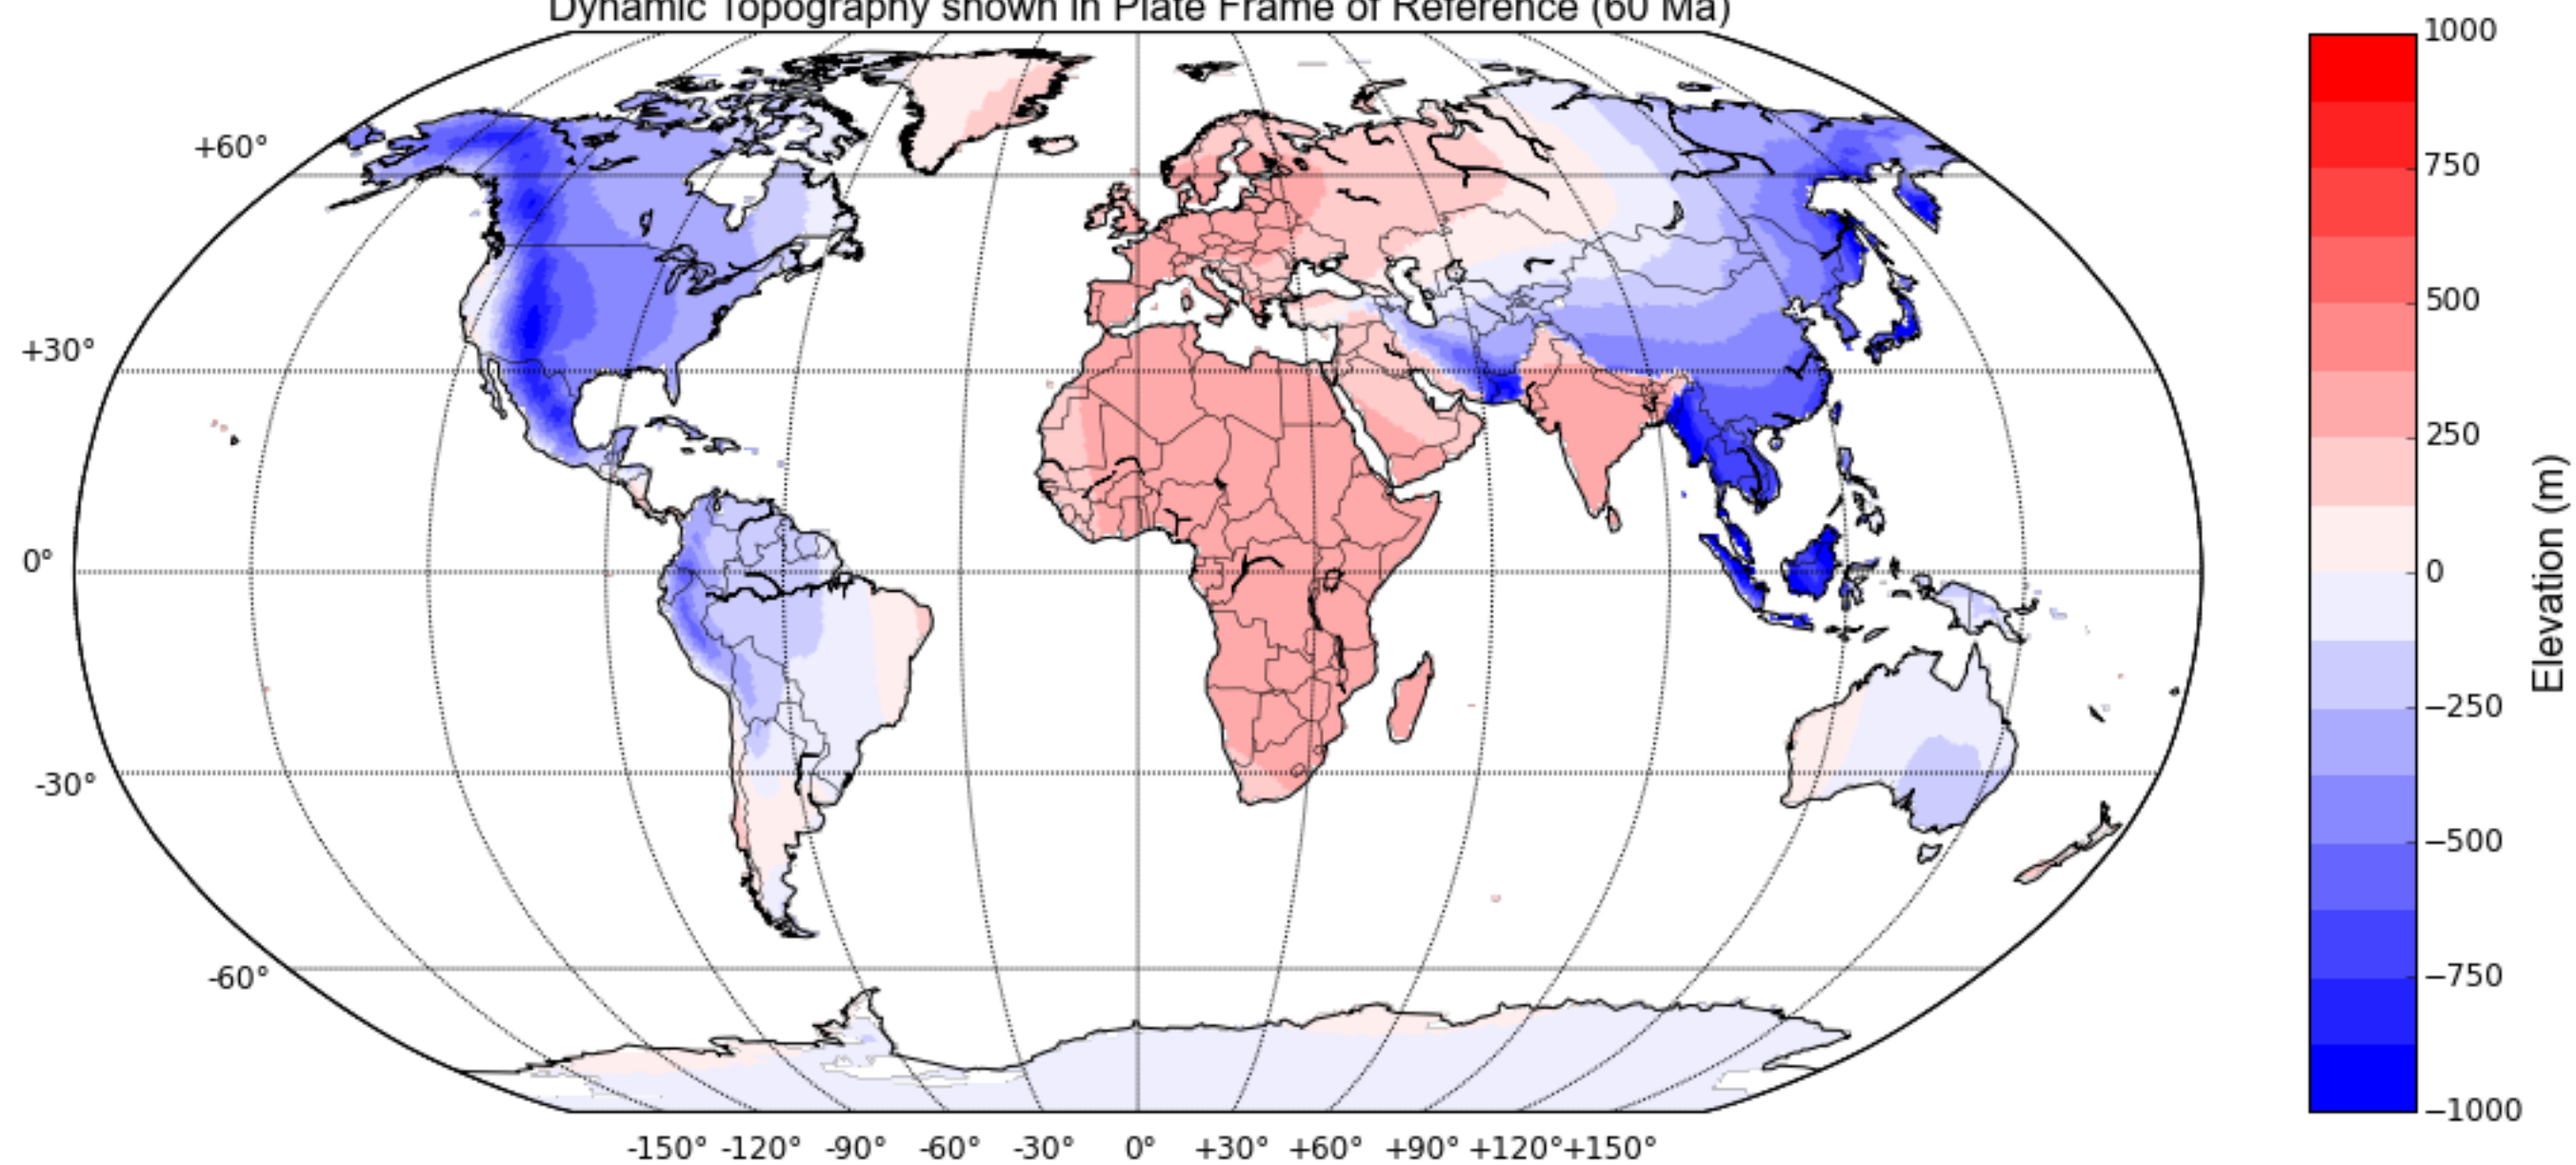

Dynamic Topography shown in Plate Frame of Reference (50 Ma)

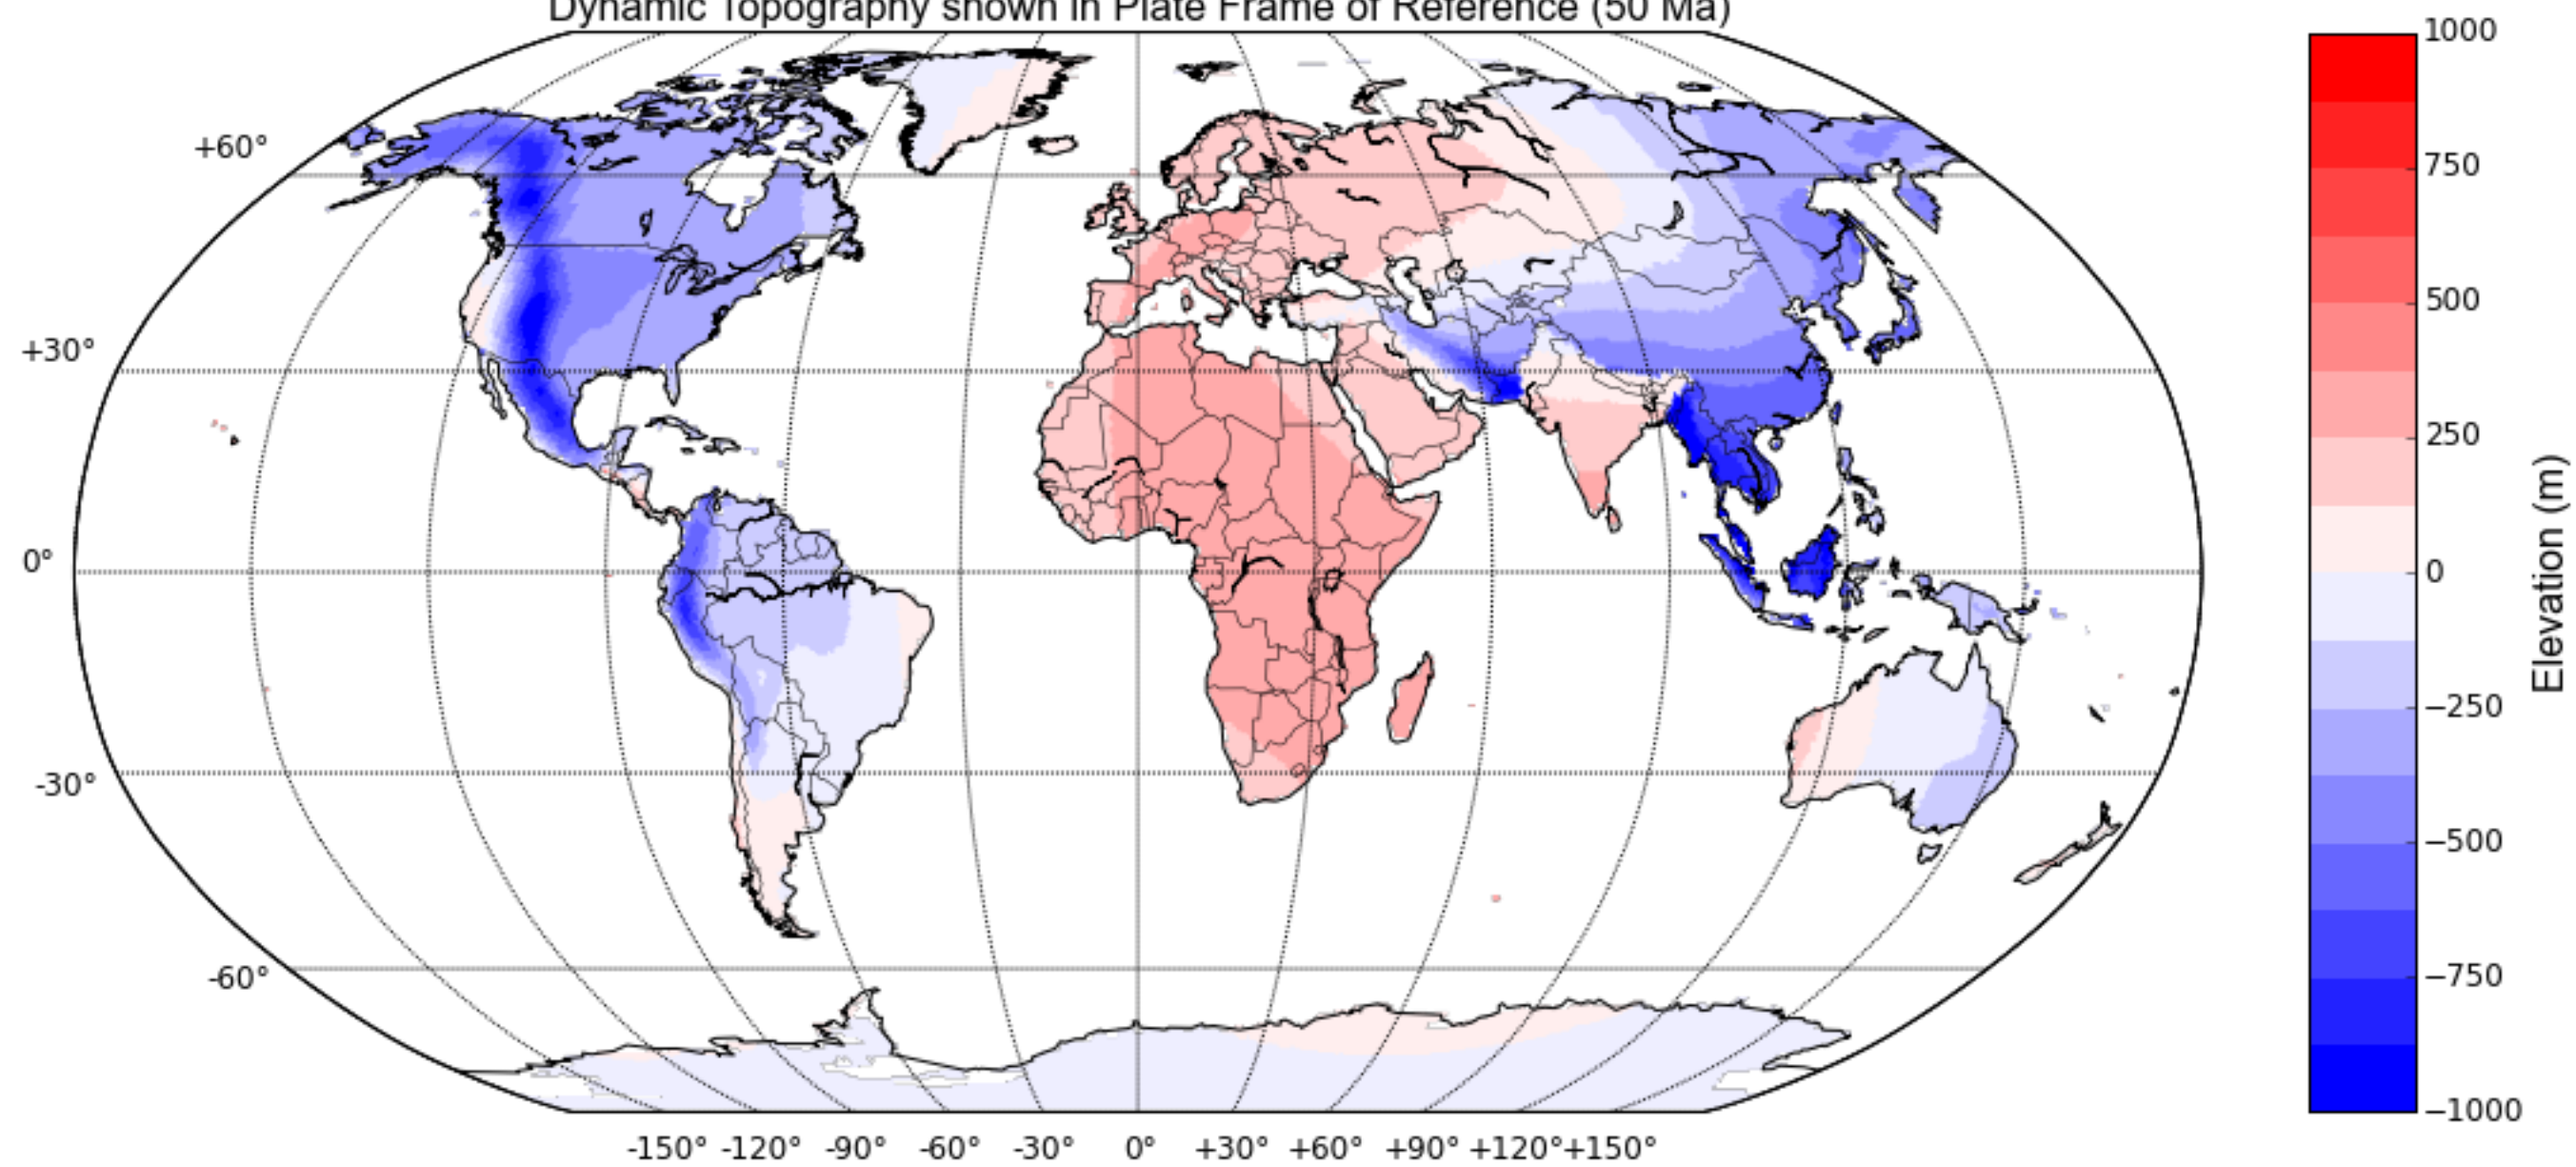

Dynamic Topography shown in Plate Frame of Reference (40 Ma)

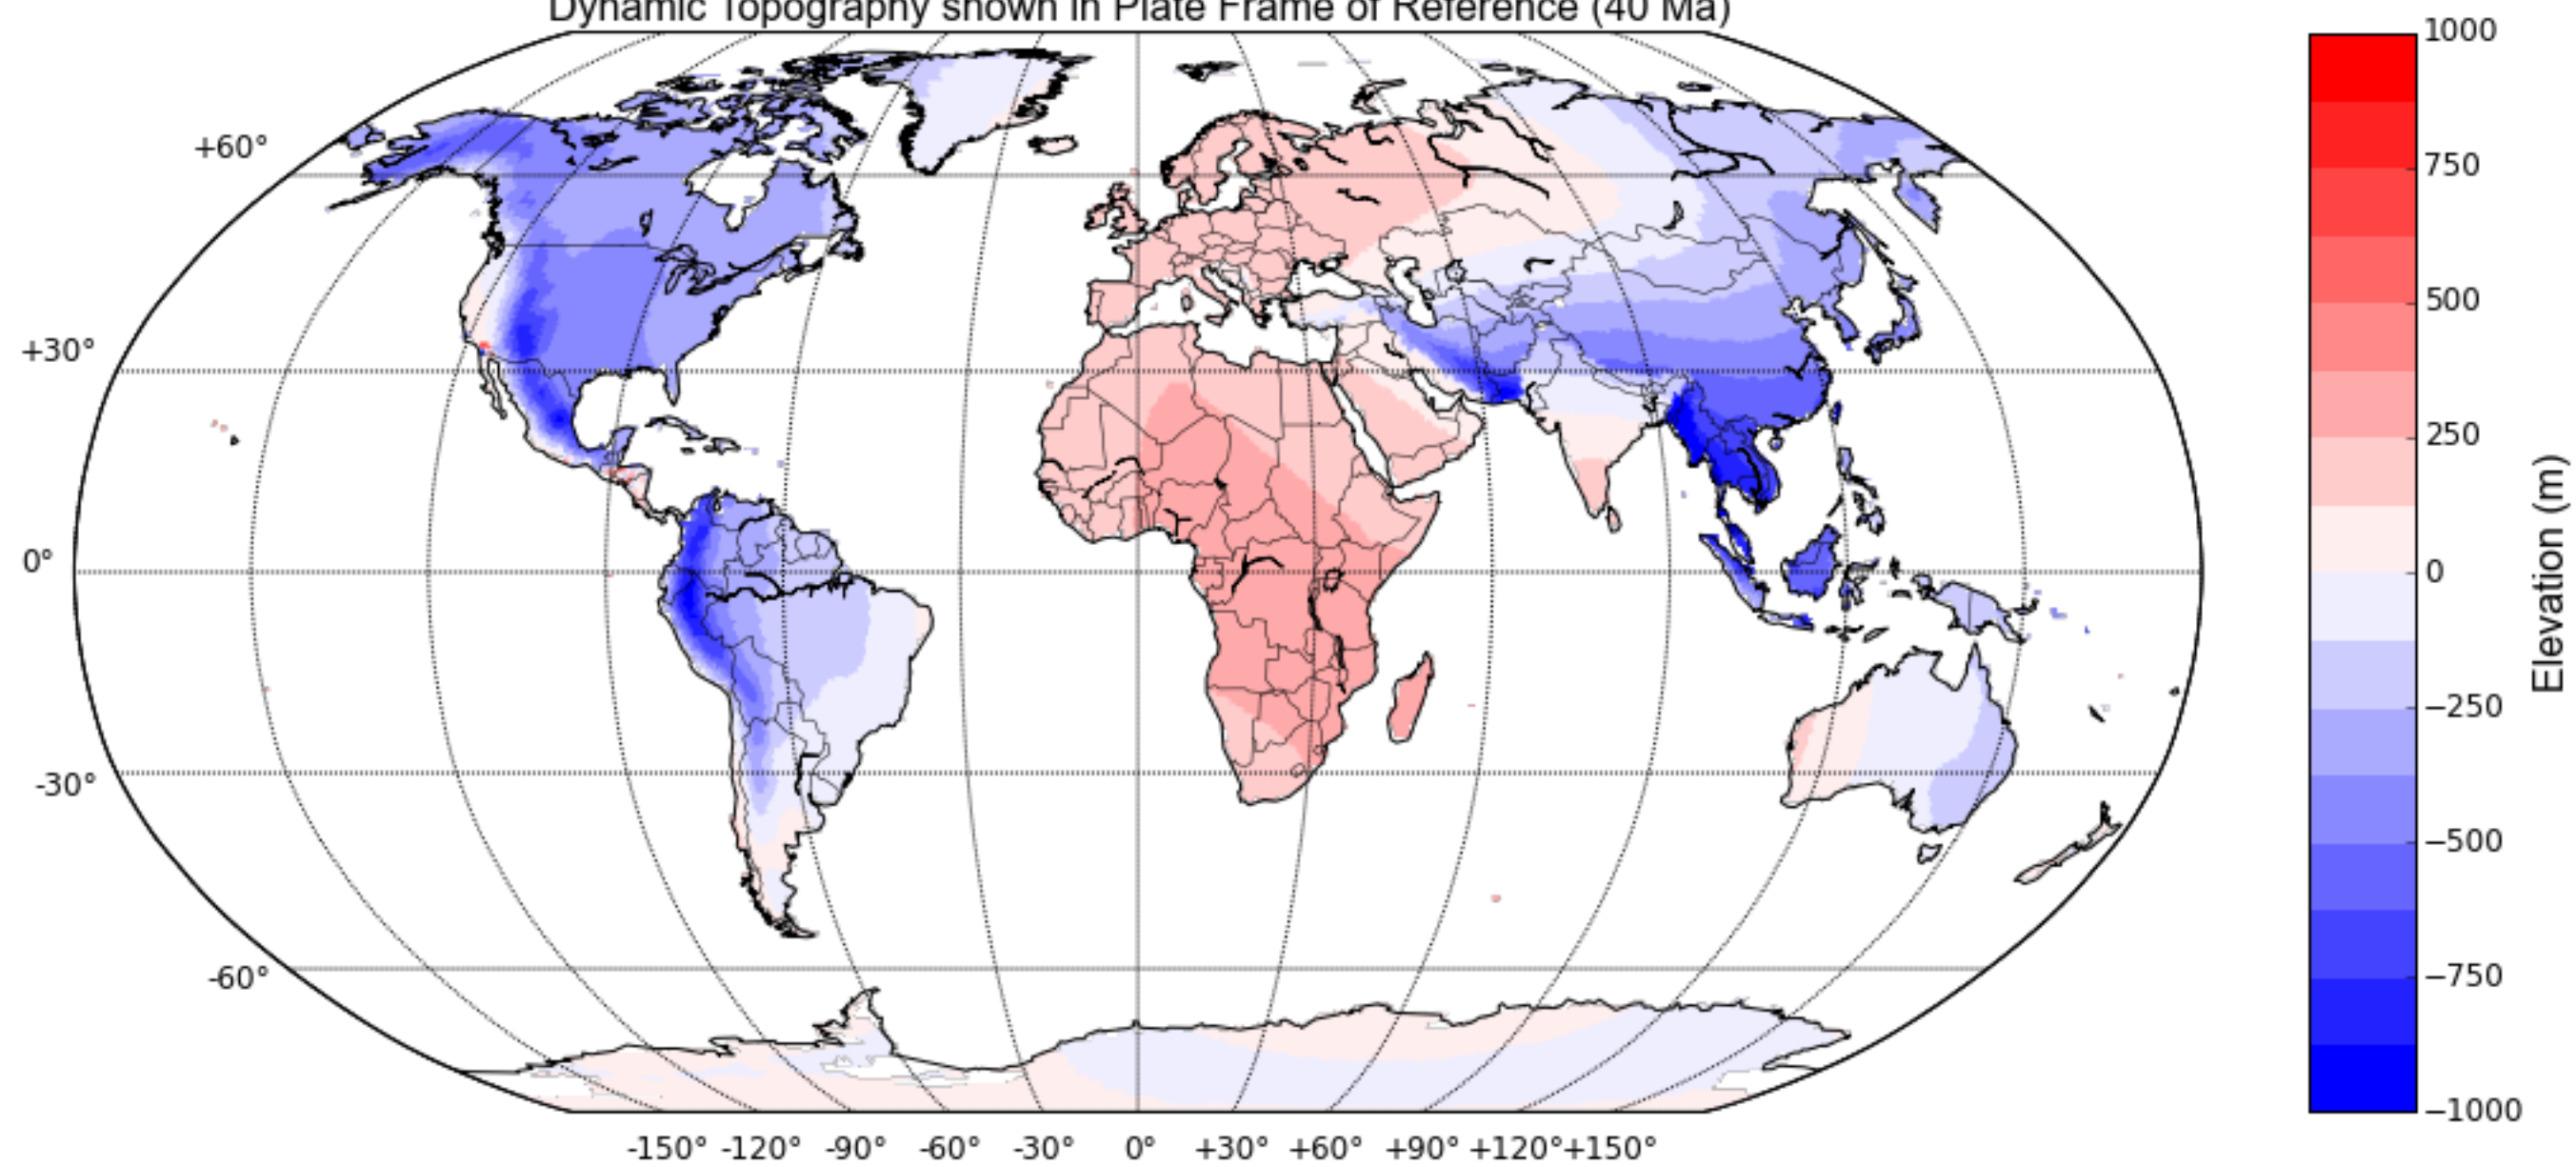



Dynamic Topography shown in Plate Frame of Reference (30 Ma)

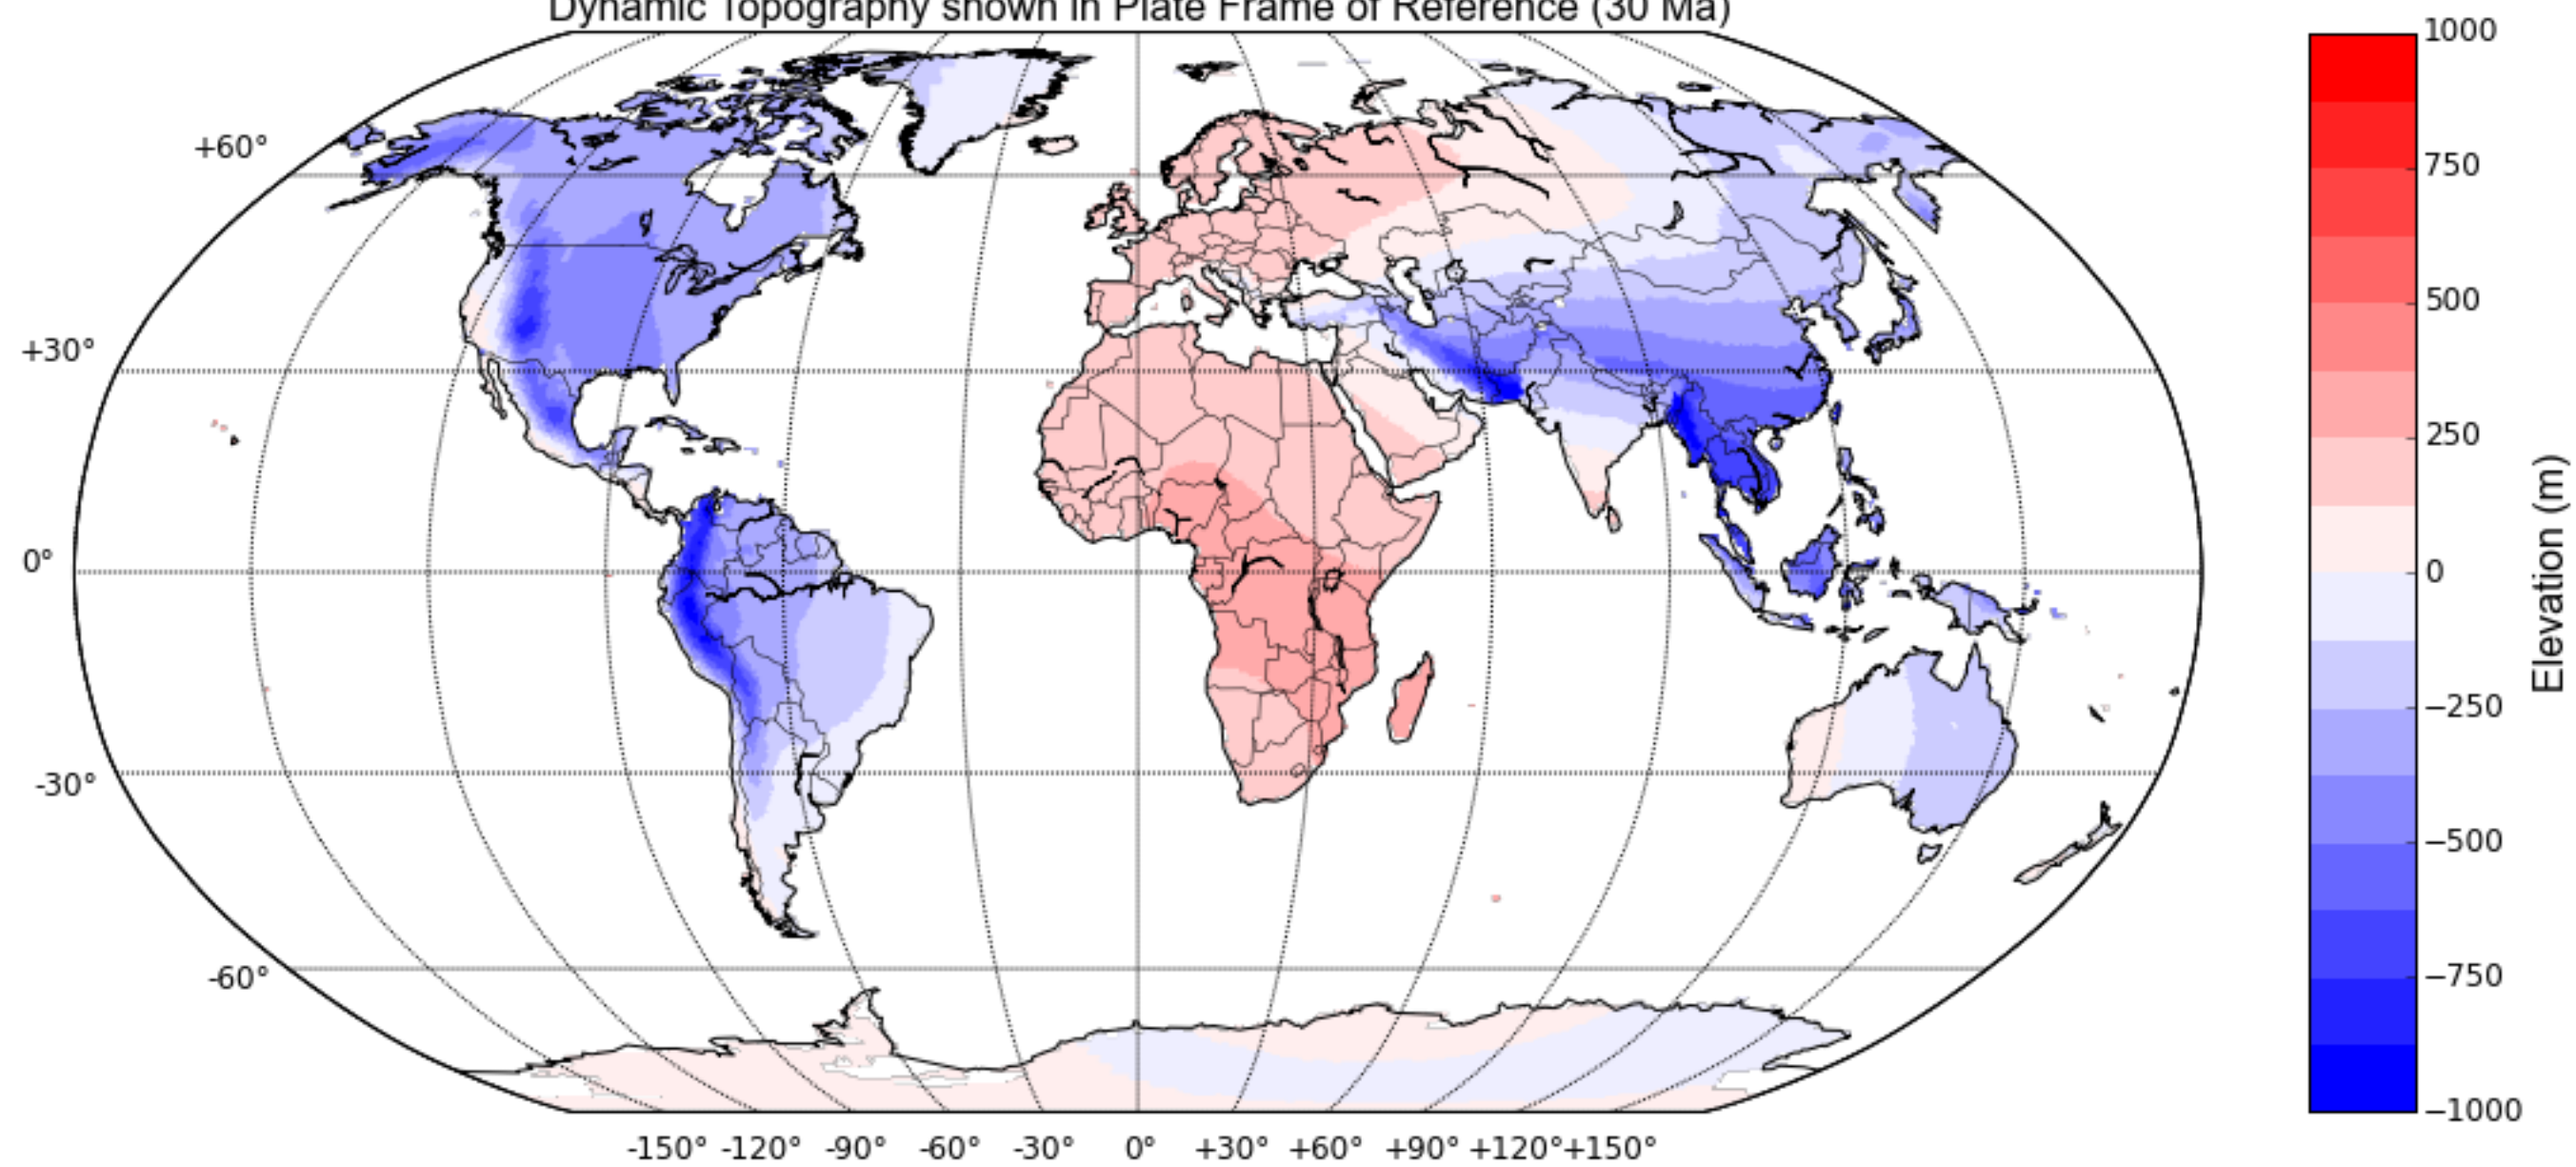

Dynamic Topography shown in Plate Frame of Reference (20 Ma)

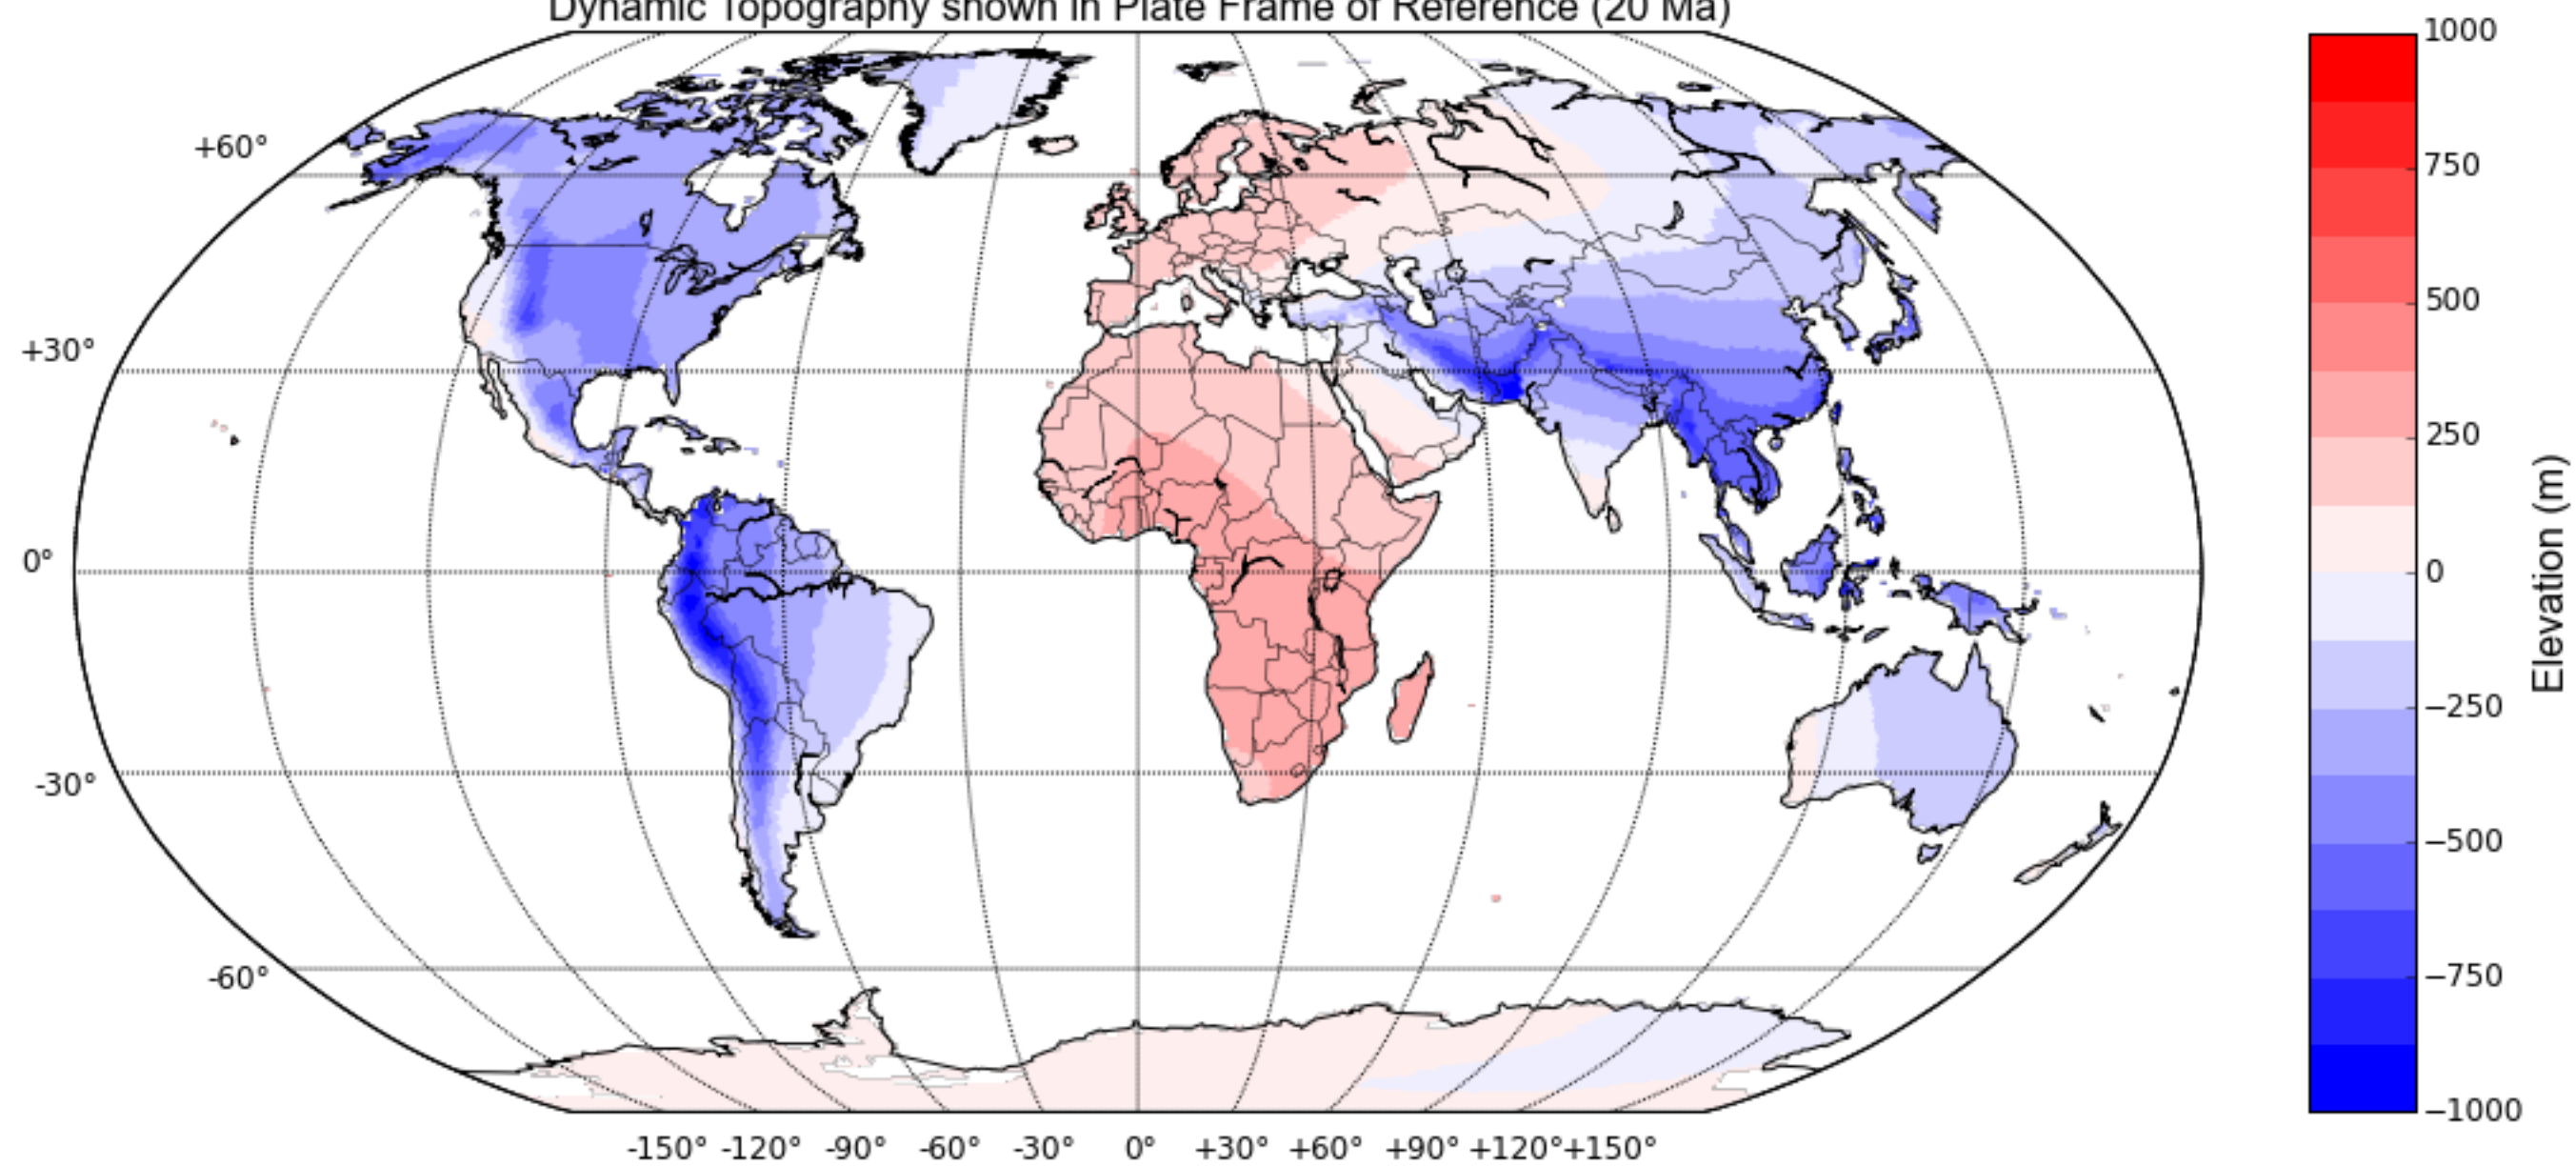

Dynamic Topography shown in Plate Frame of Reference (10 Ma)

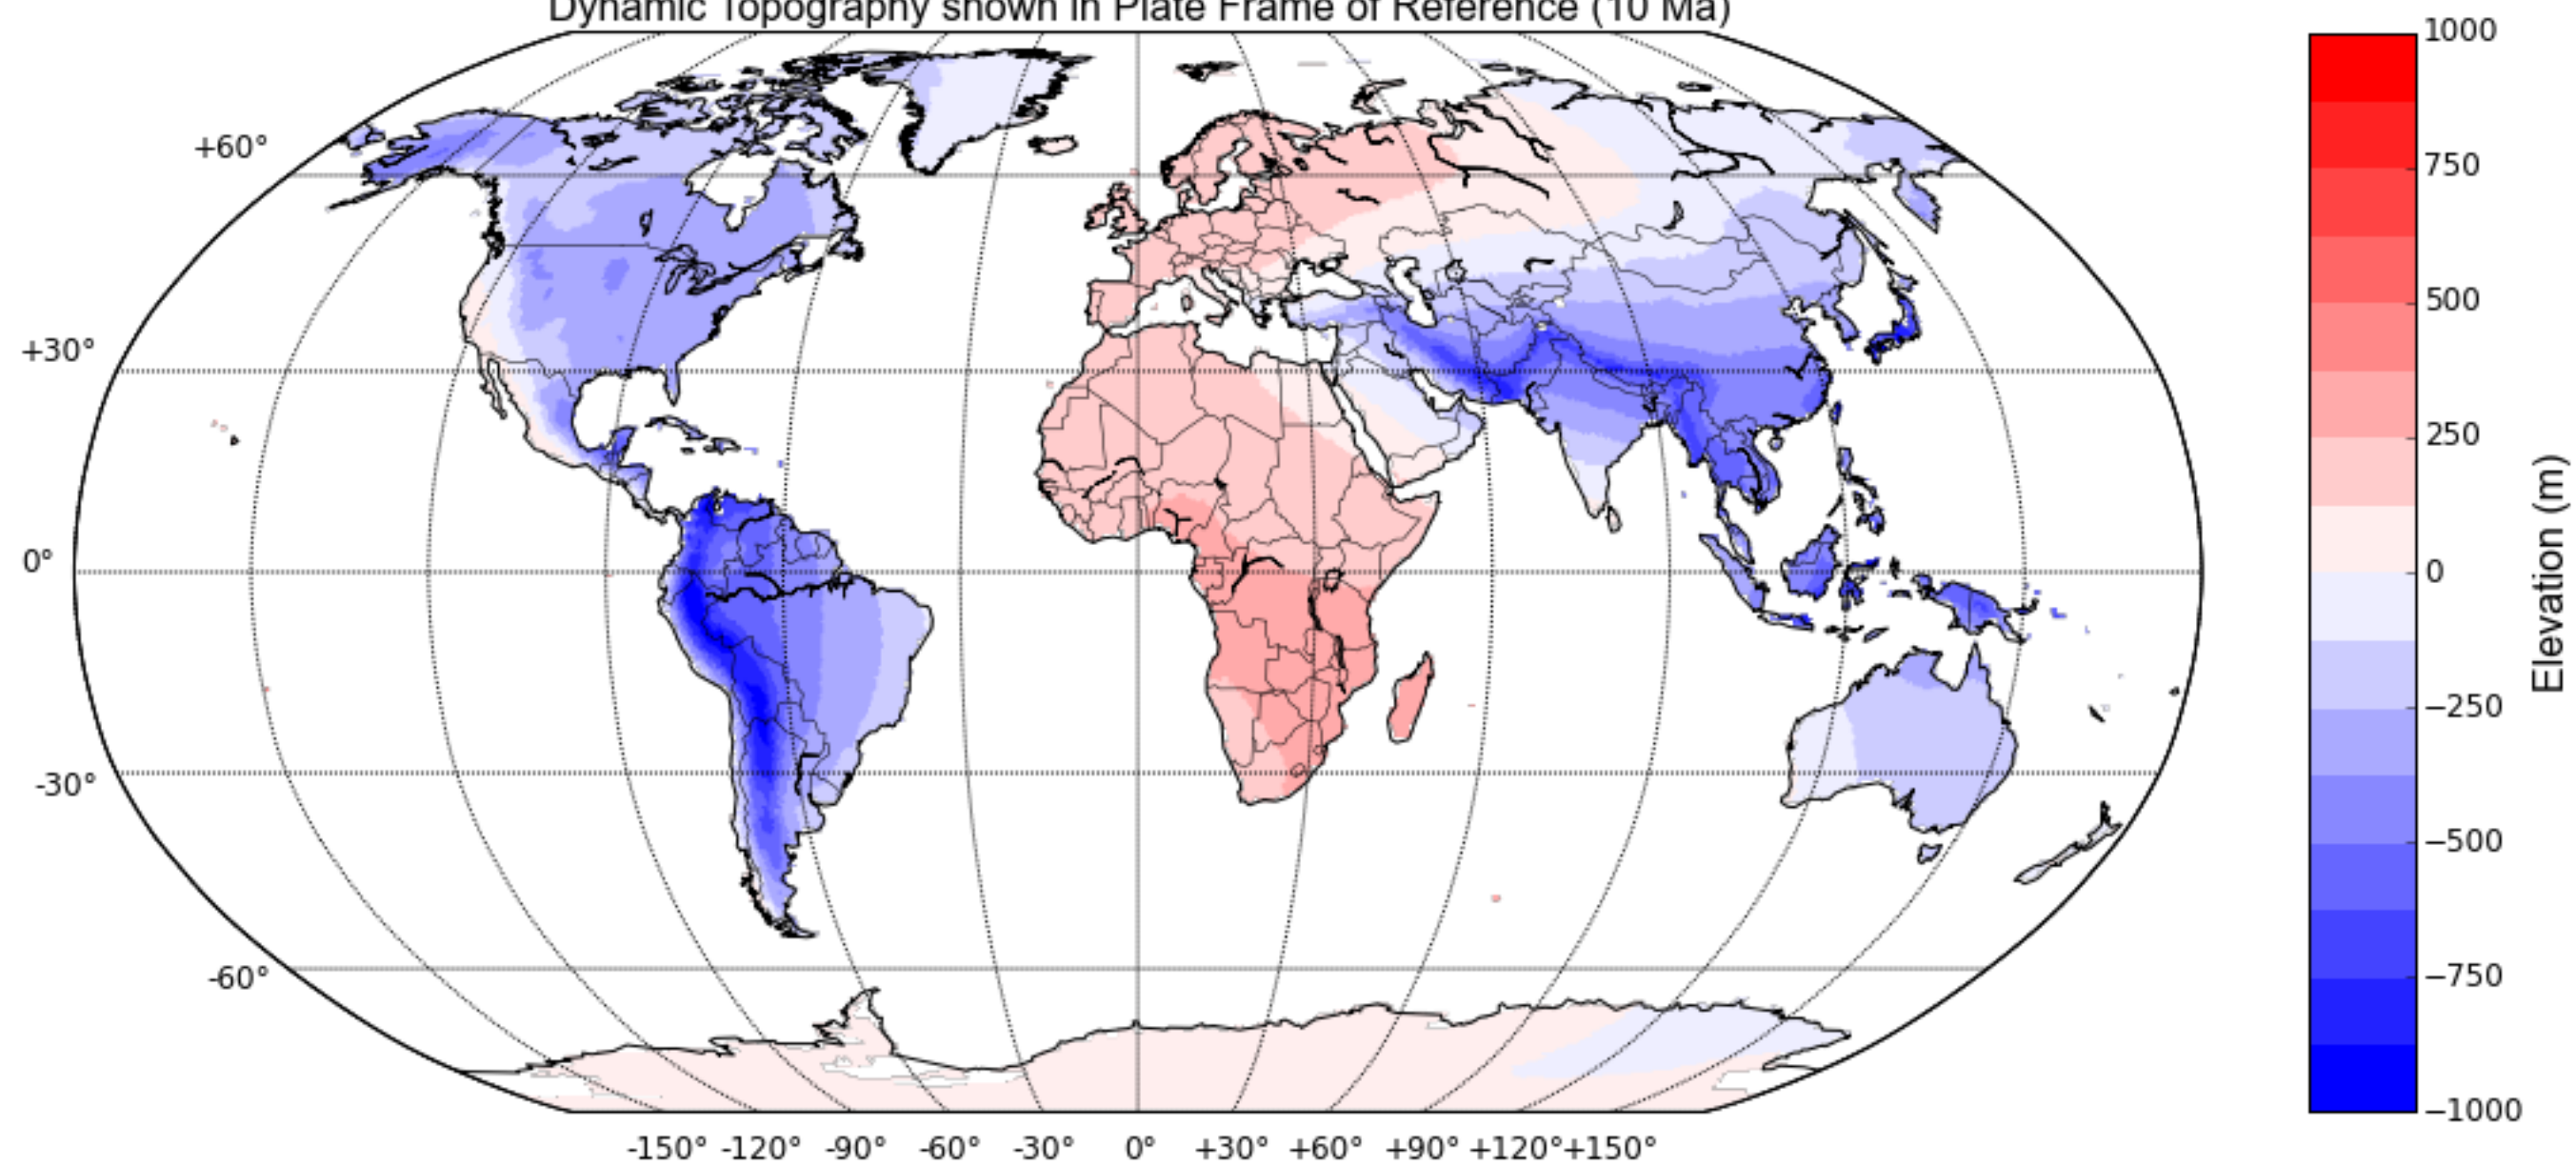



Dynamic Topography shown in Plate Frame of Reference (0 Ma)

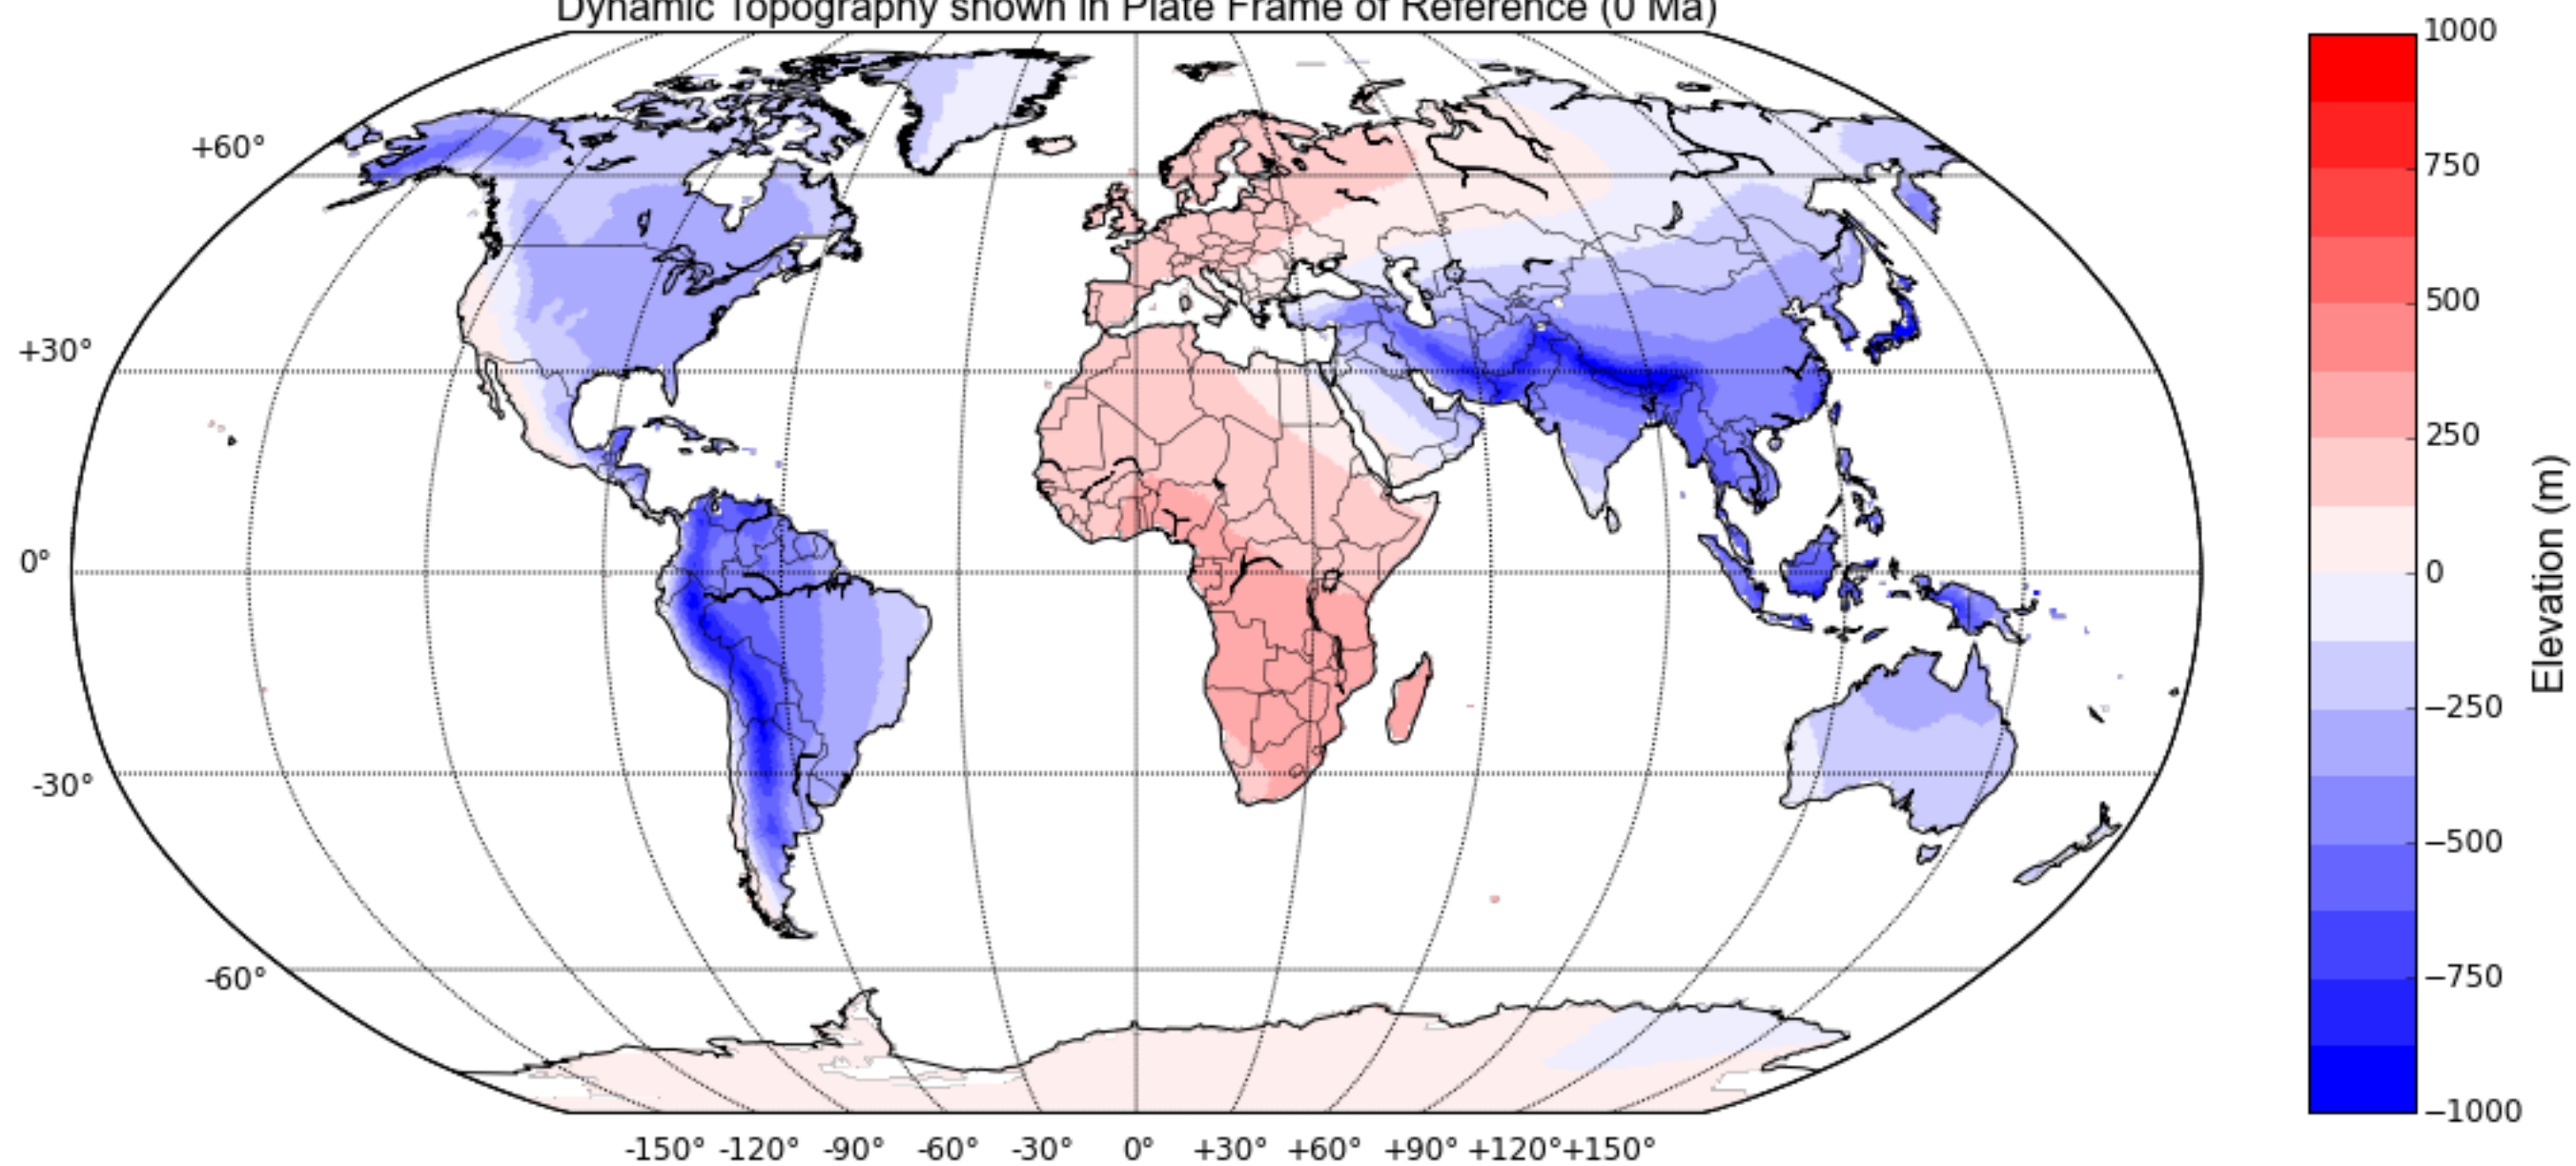

Supplement: Supplementary file 2 [file rubey_m_03_SUPP_DynaTopo_plateframe_10Myr.pdf › Pics_App_FINAL/rubey_m_03_SUPP_DynaTopo_plateframe_10Myr.pdf]
