# Supplementary material for: Global patterns of Earth's dynamic topography since the Jurassic
Source: Copernicus journal article supplement (doi:10.5194/se-2017-26), 2017-03-23

# Dynamic topography at 200 Ma

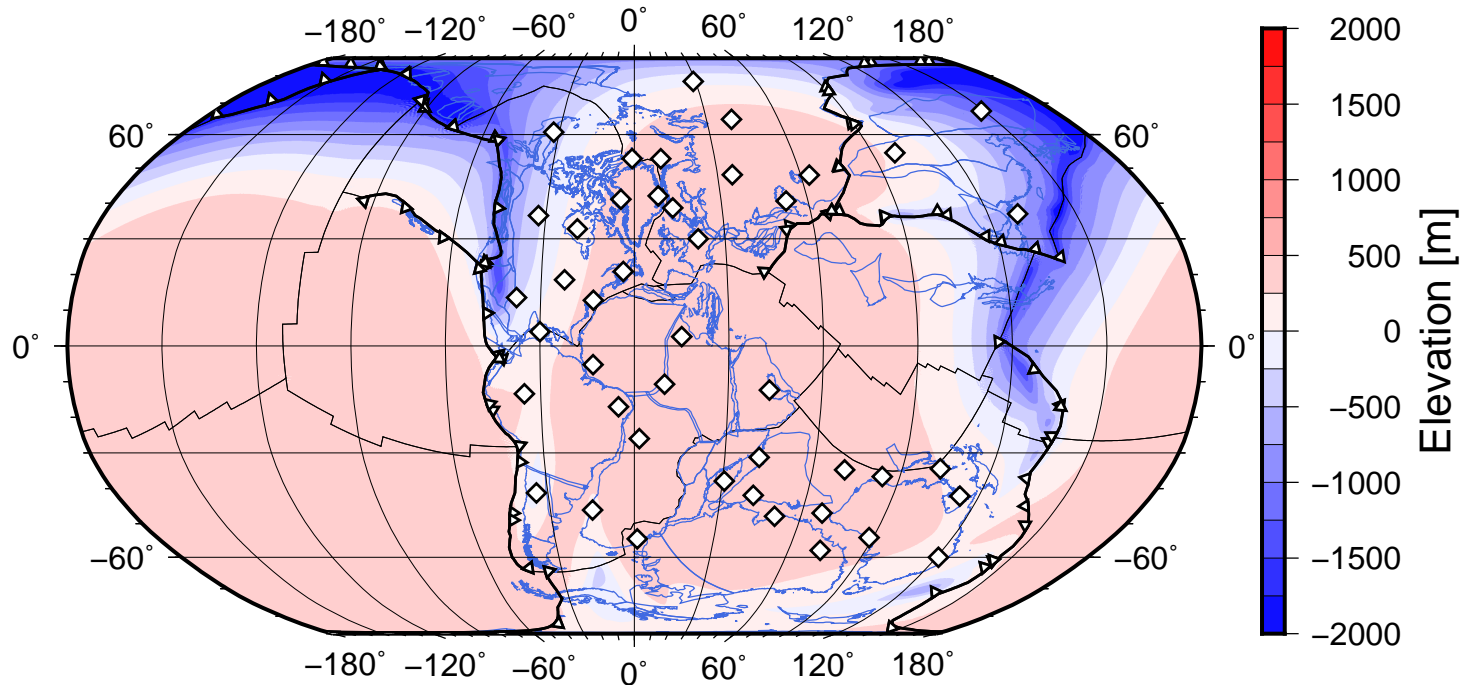

# Dynamic topography at 190 Ma

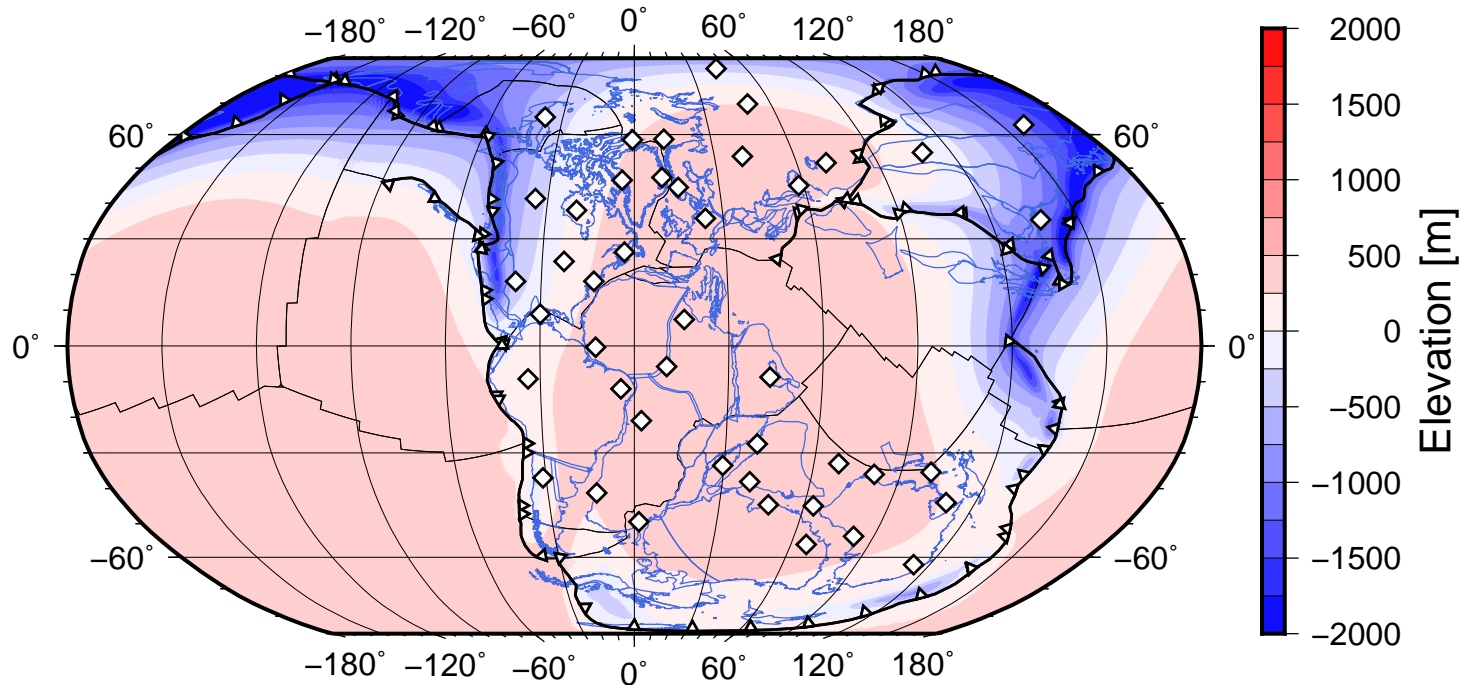

# Dynamic topography at 180 Ma

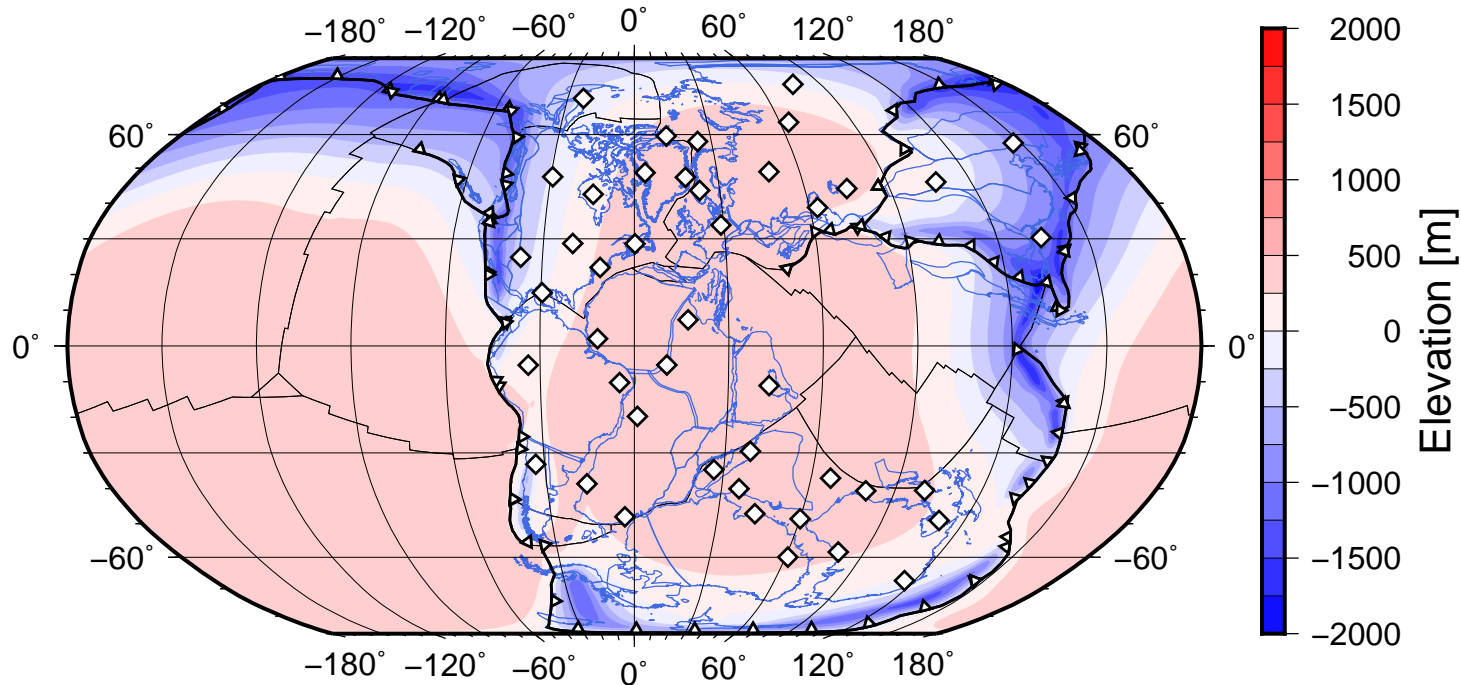

# Dynamic topography at 170 Ma

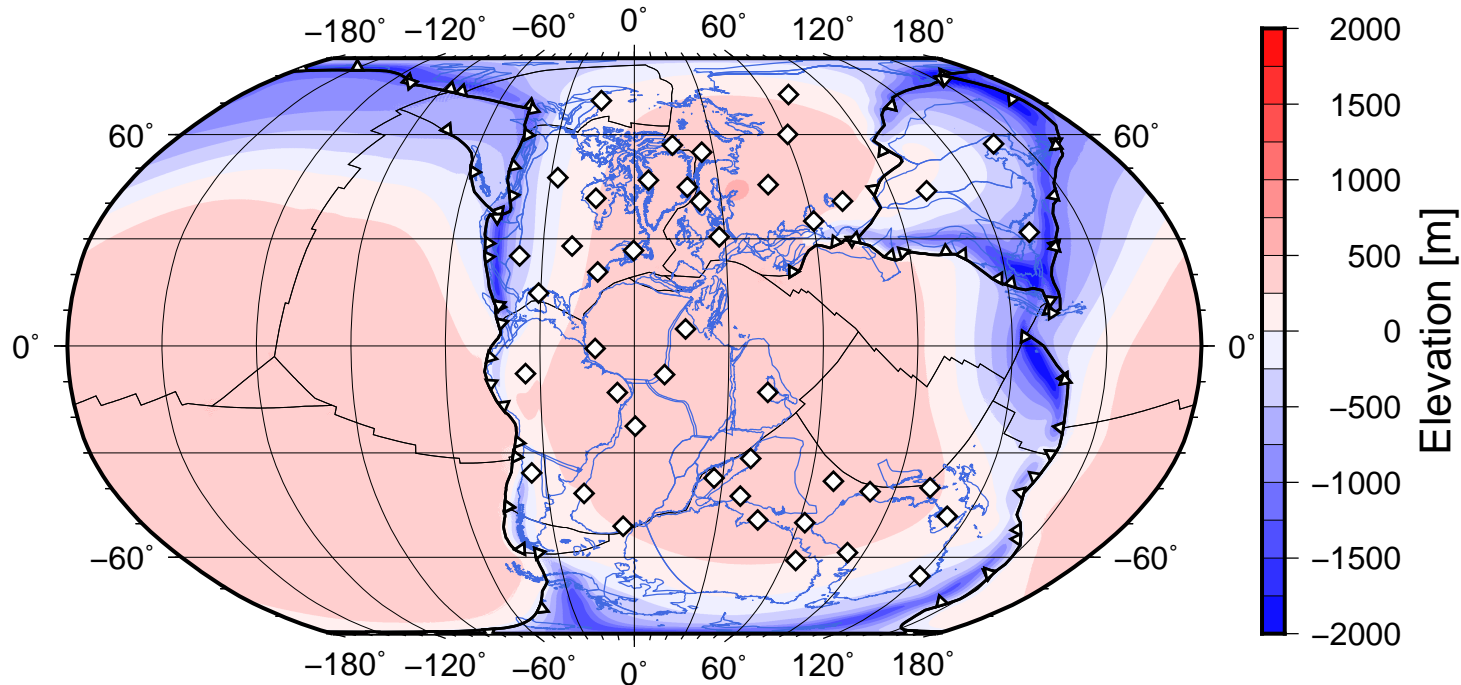

# Dynamic topography at 160 Ma

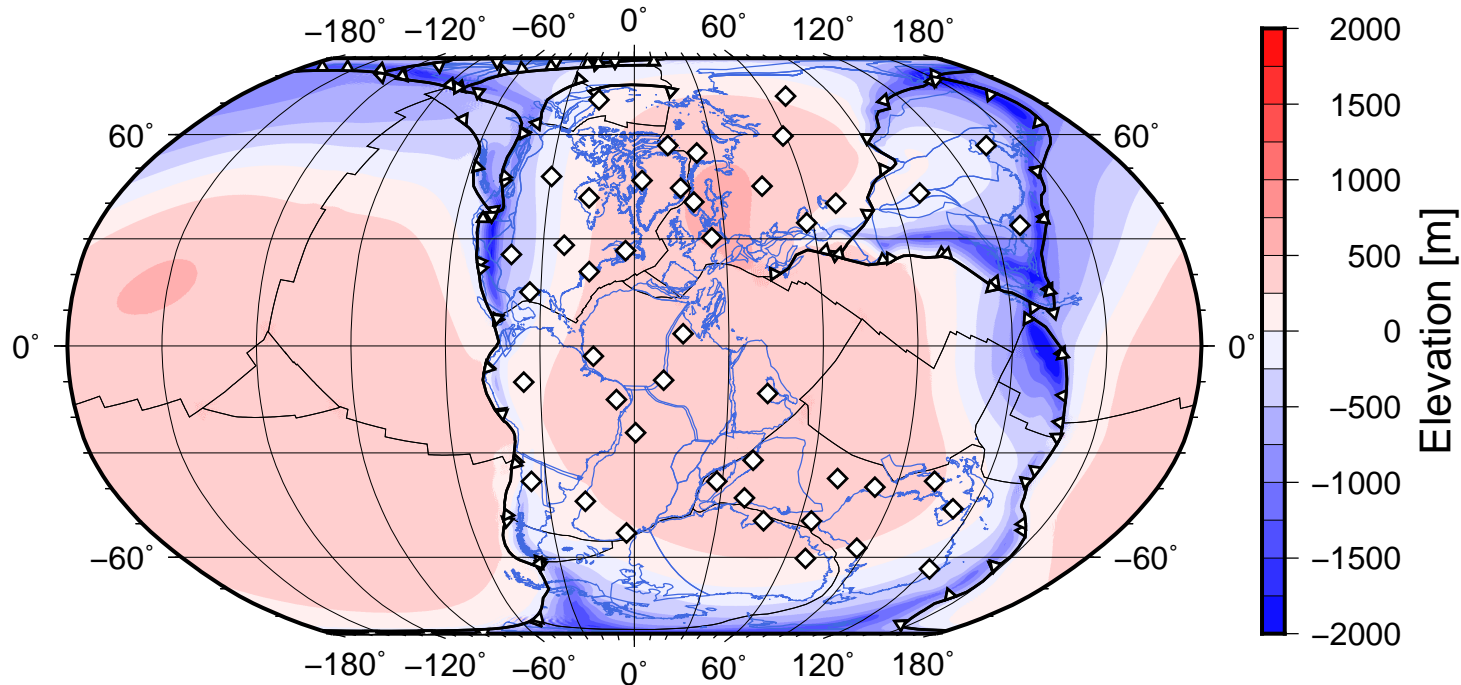

# Dynamic topography at 150 Ma

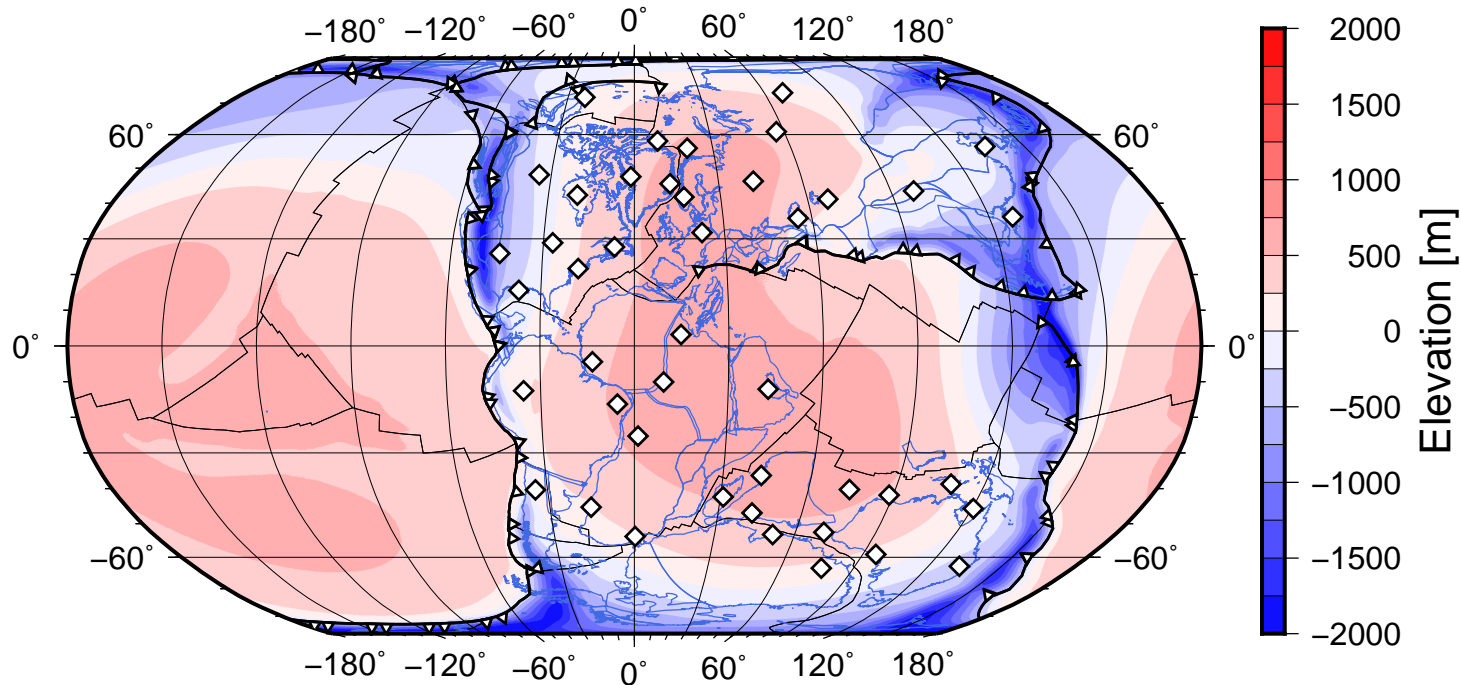

# Dynamic topography at 140 Ma

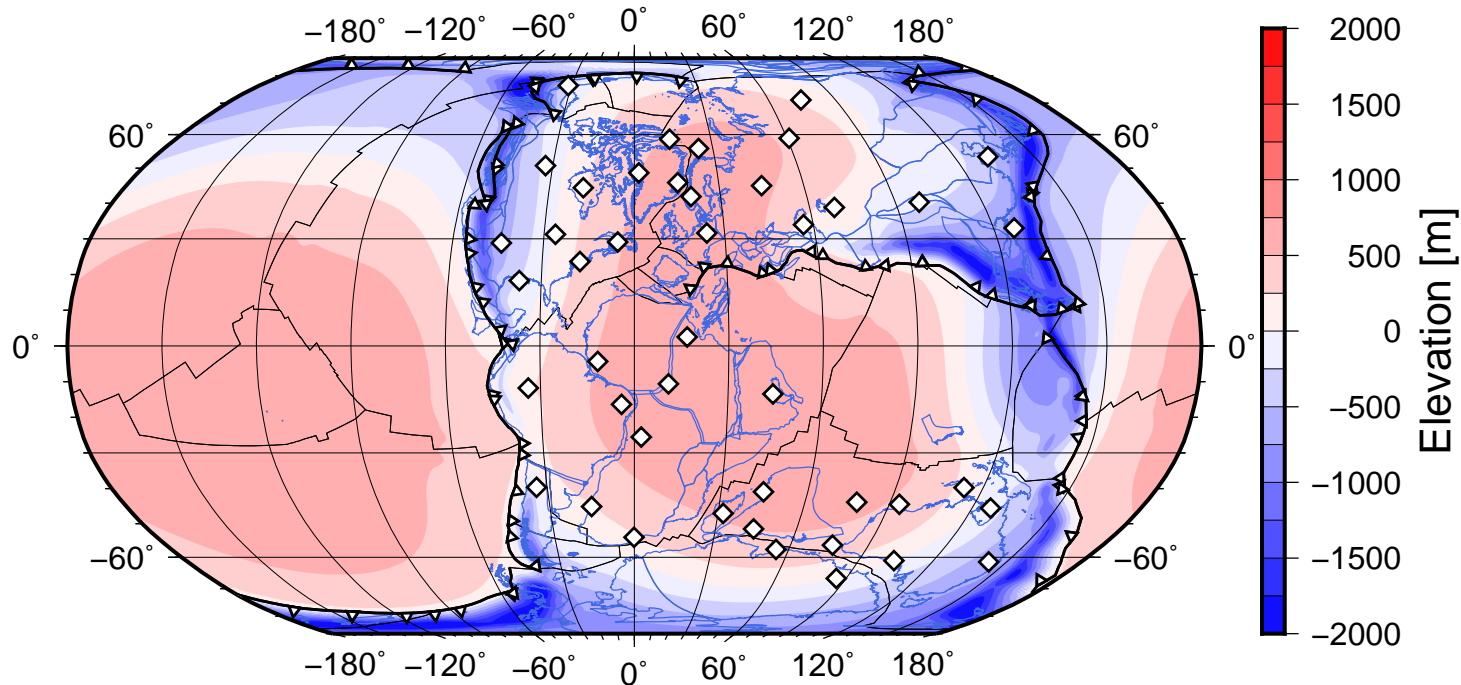

# Dynamic topography at 130 Ma

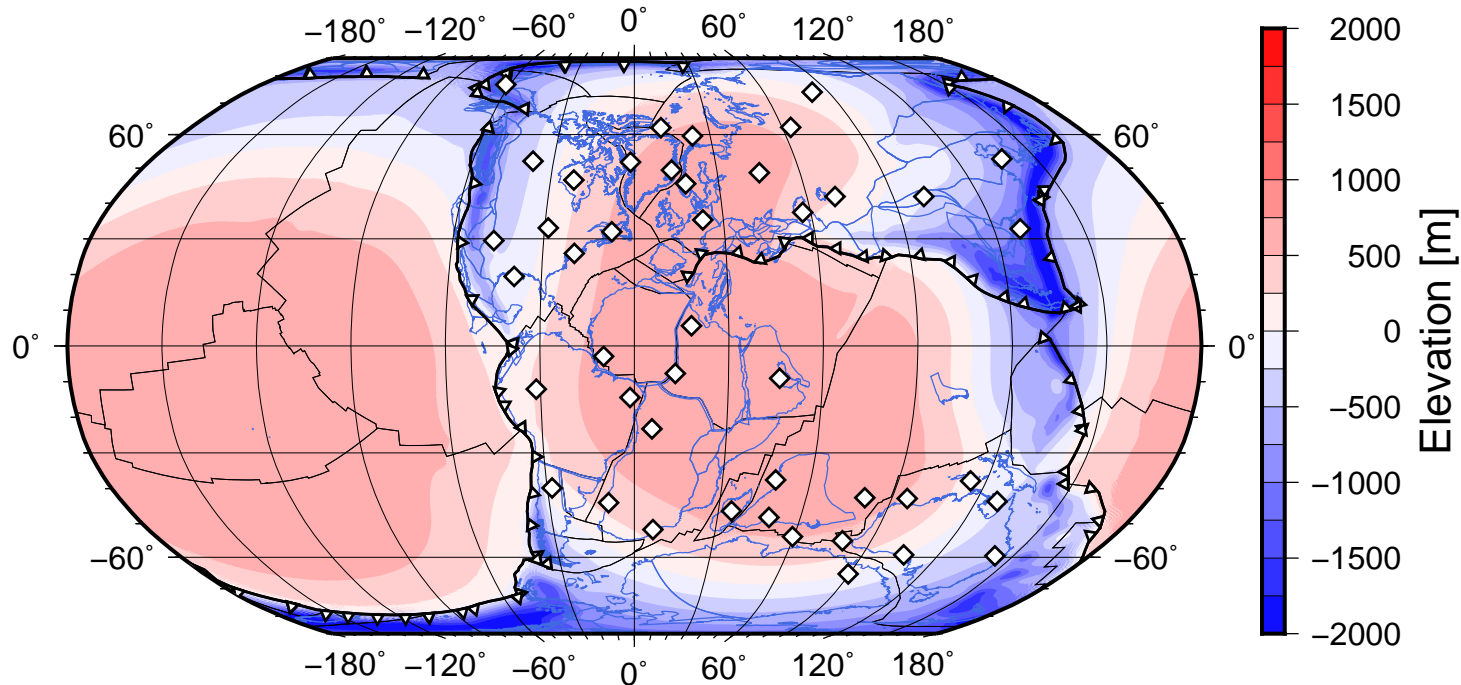



# Dynamic topography at 120 Ma

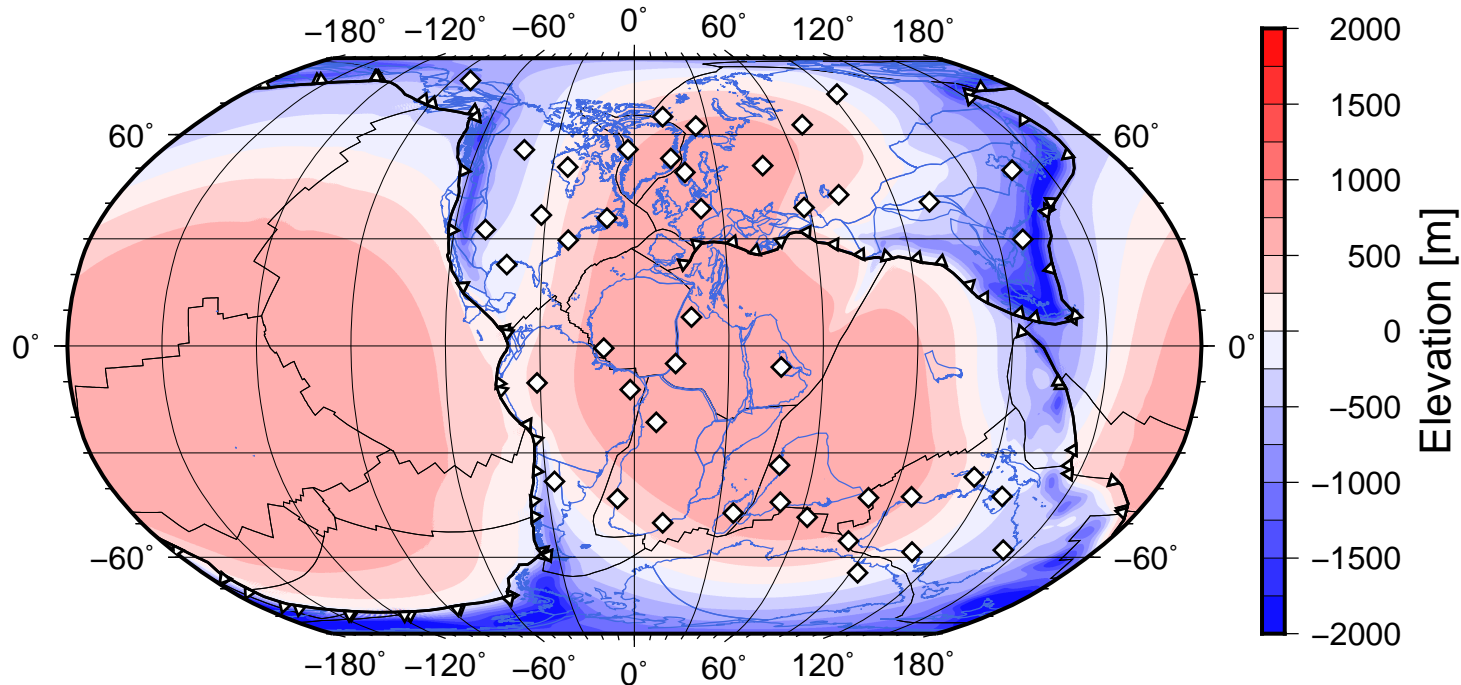

# Dynamic topography at 110 Ma

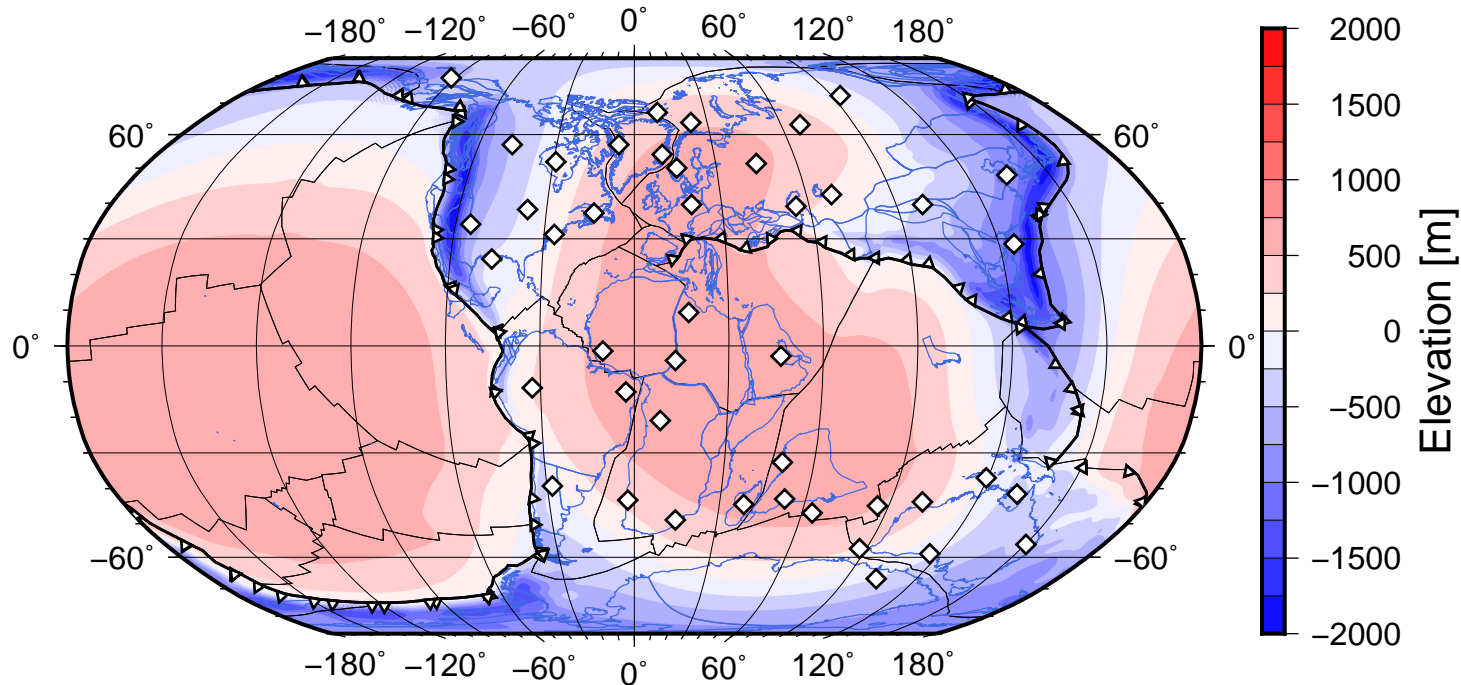

# Dynamic topography at 100 Ma

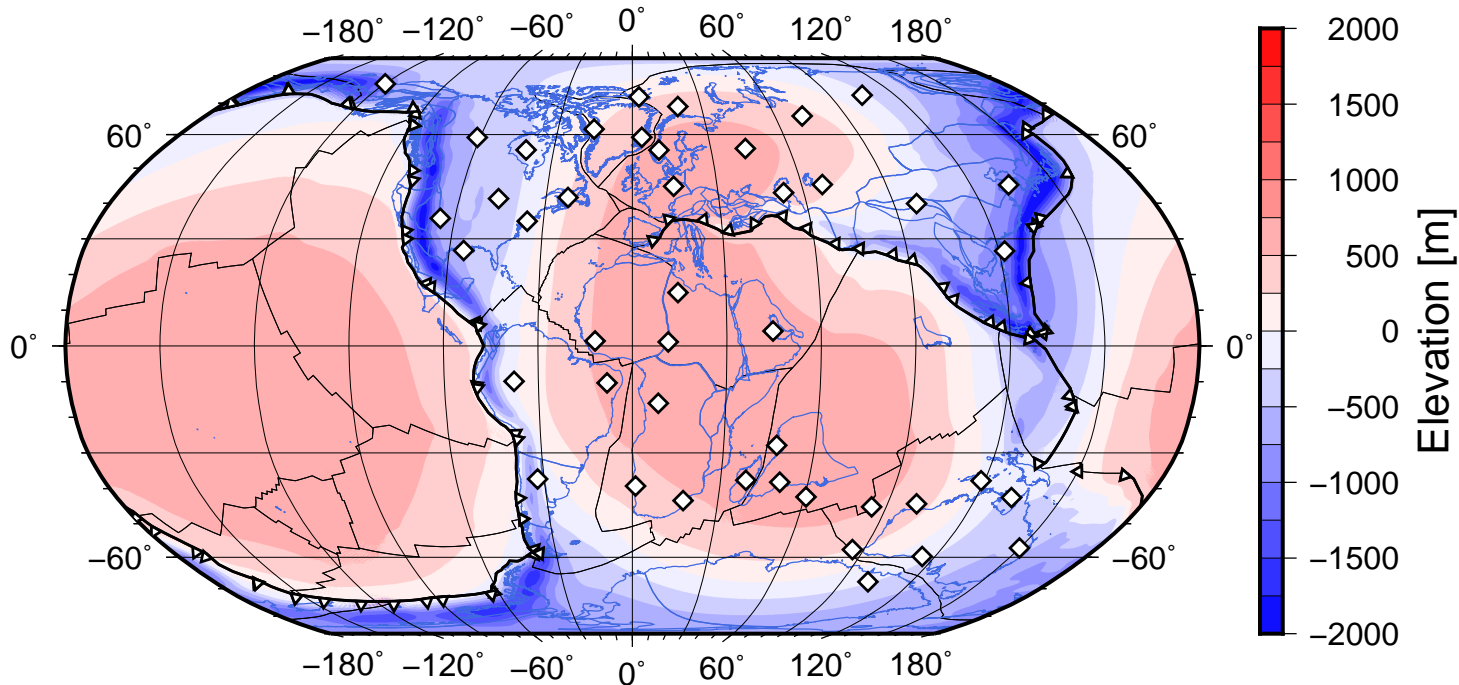

# Dynamic topography at 90 Ma

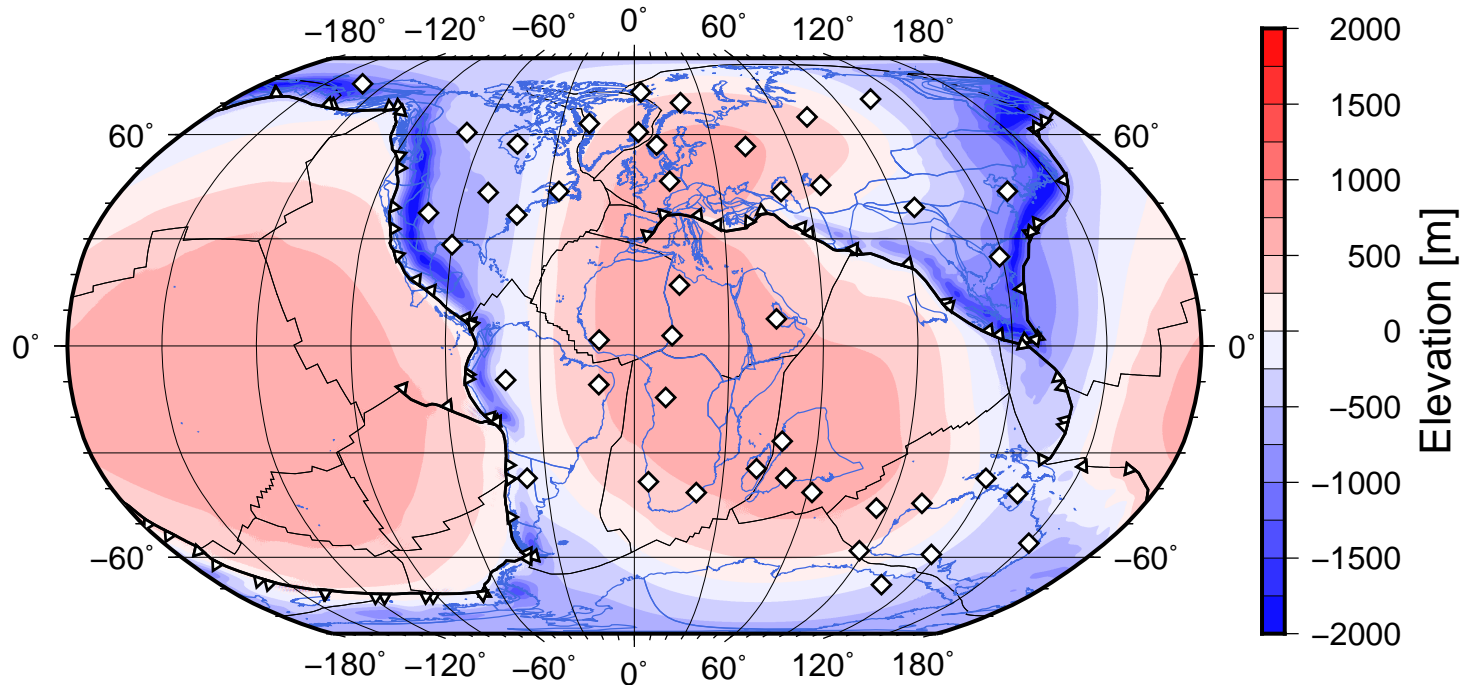

# Dynamic topography at 80 Ma

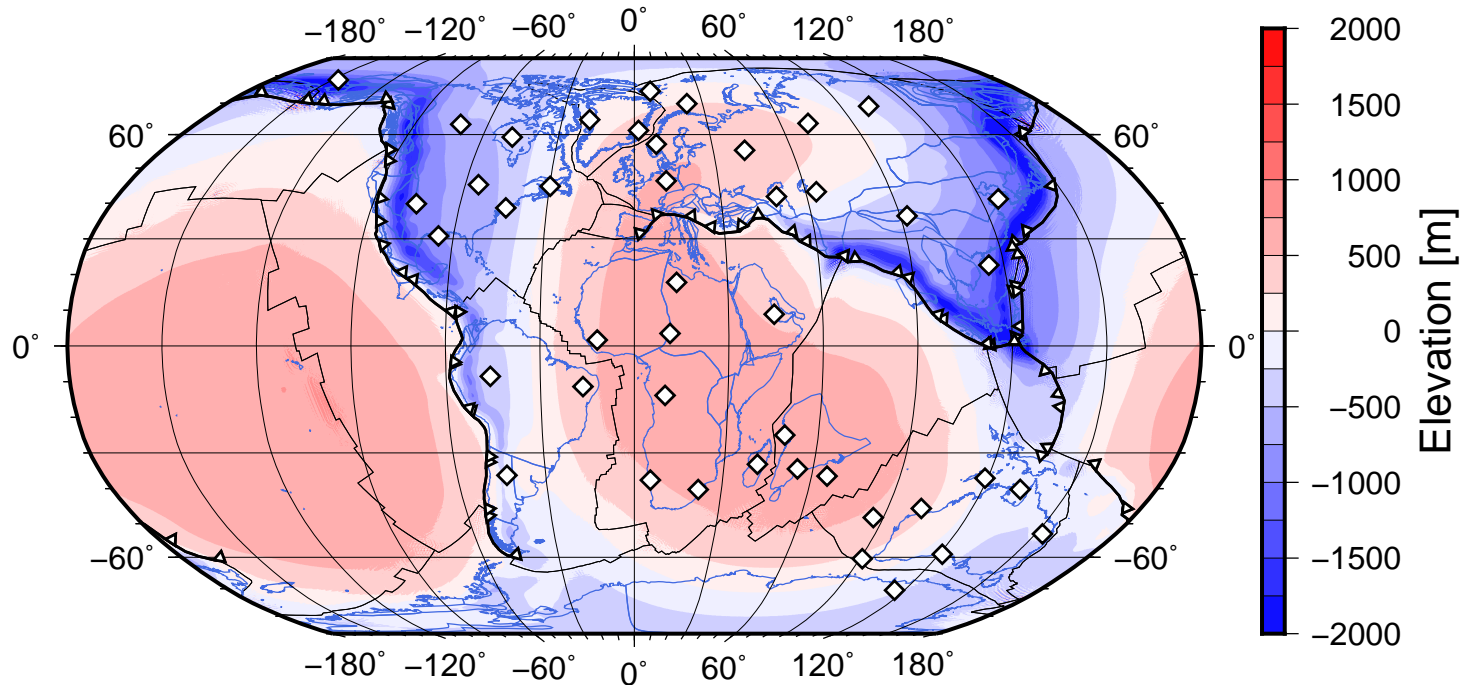

# Dynamic topography at 70 Ma

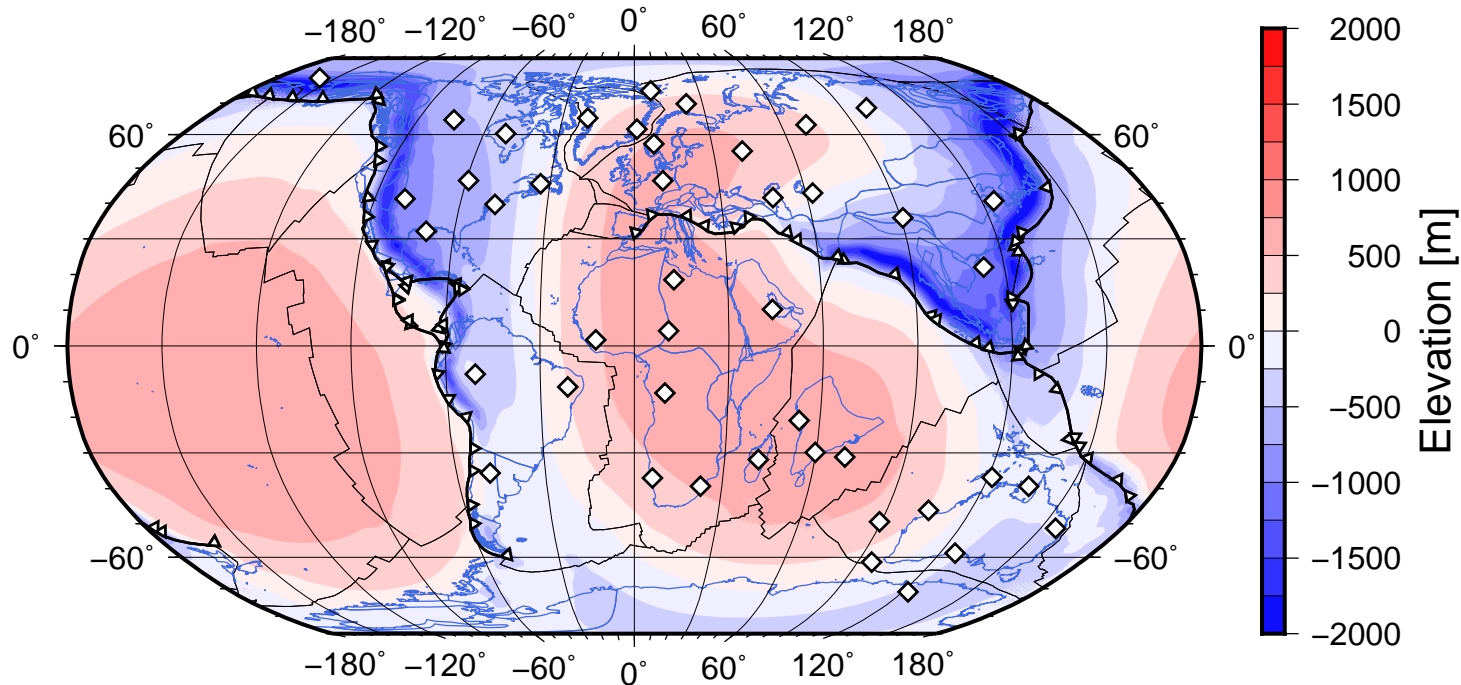

# Dynamic topography at 60 Ma

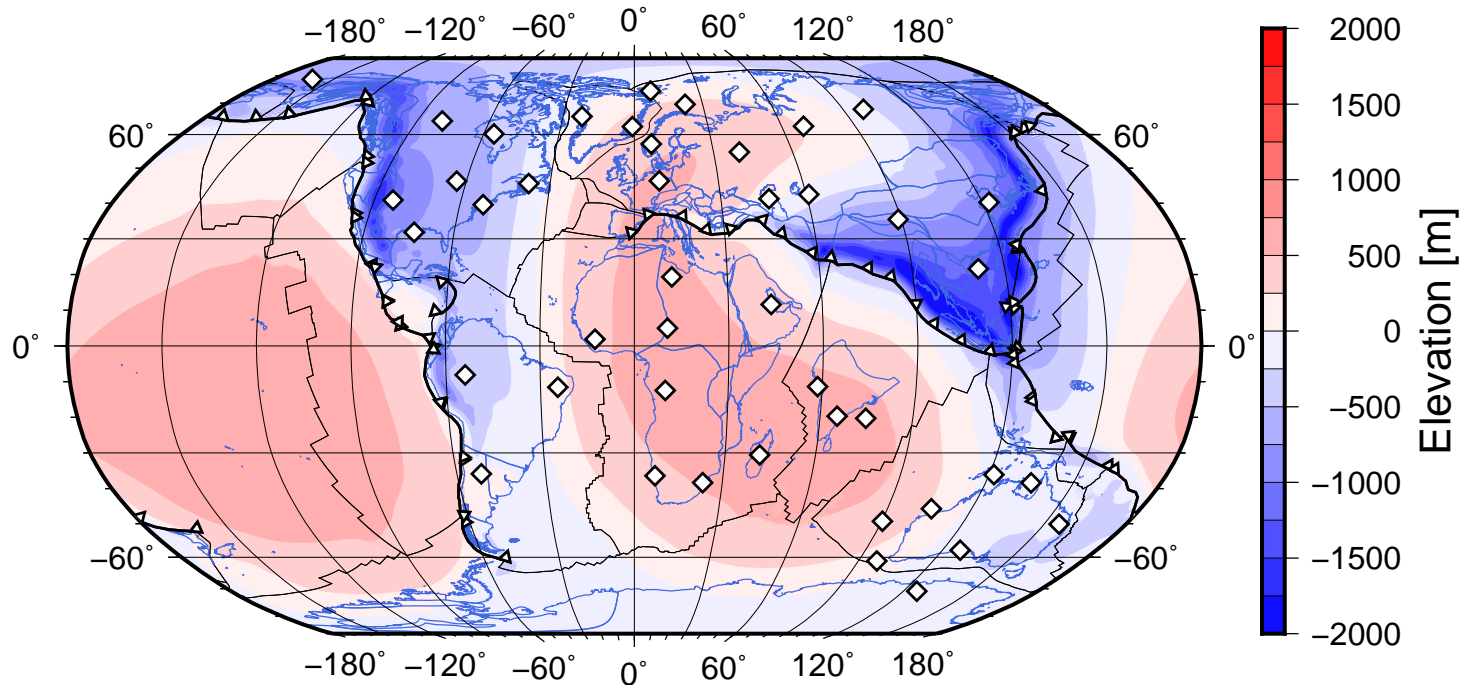

# Dynamic topography at 50 Ma

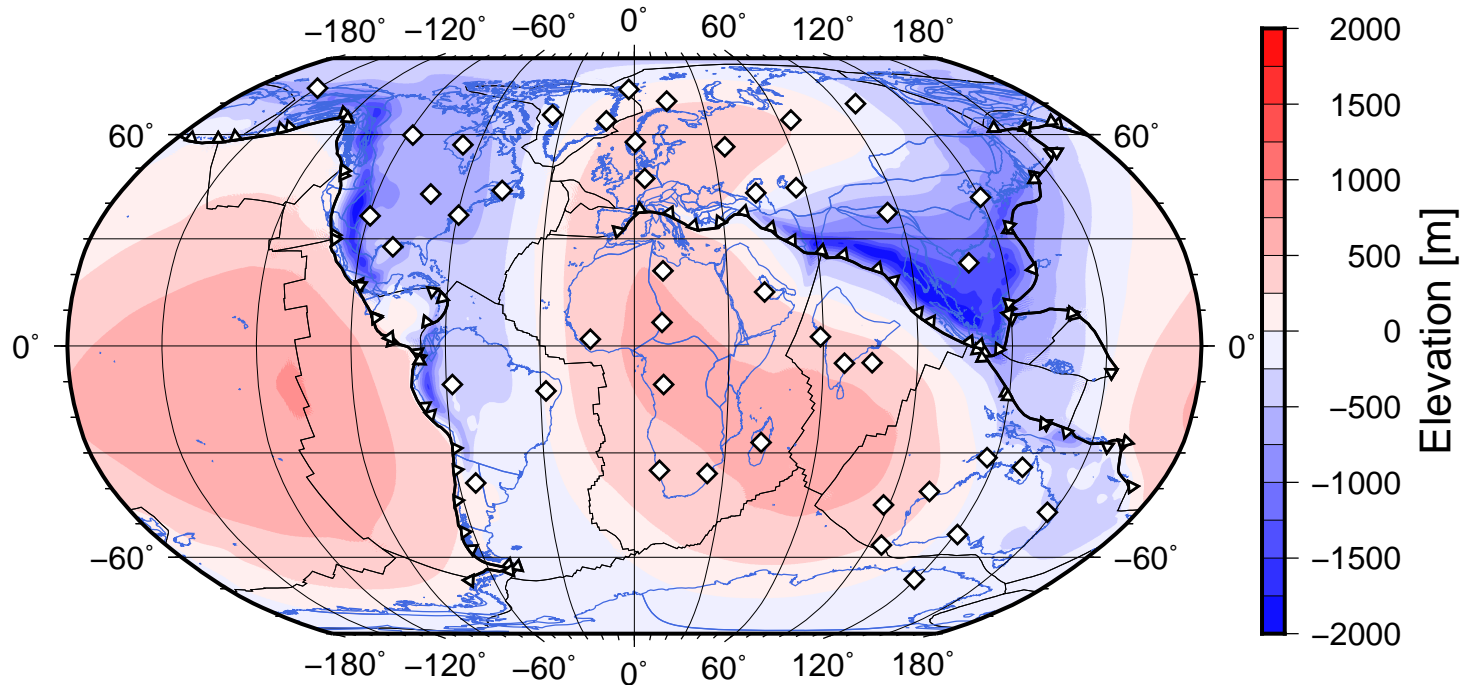



# Dynamic topography at 40 Ma

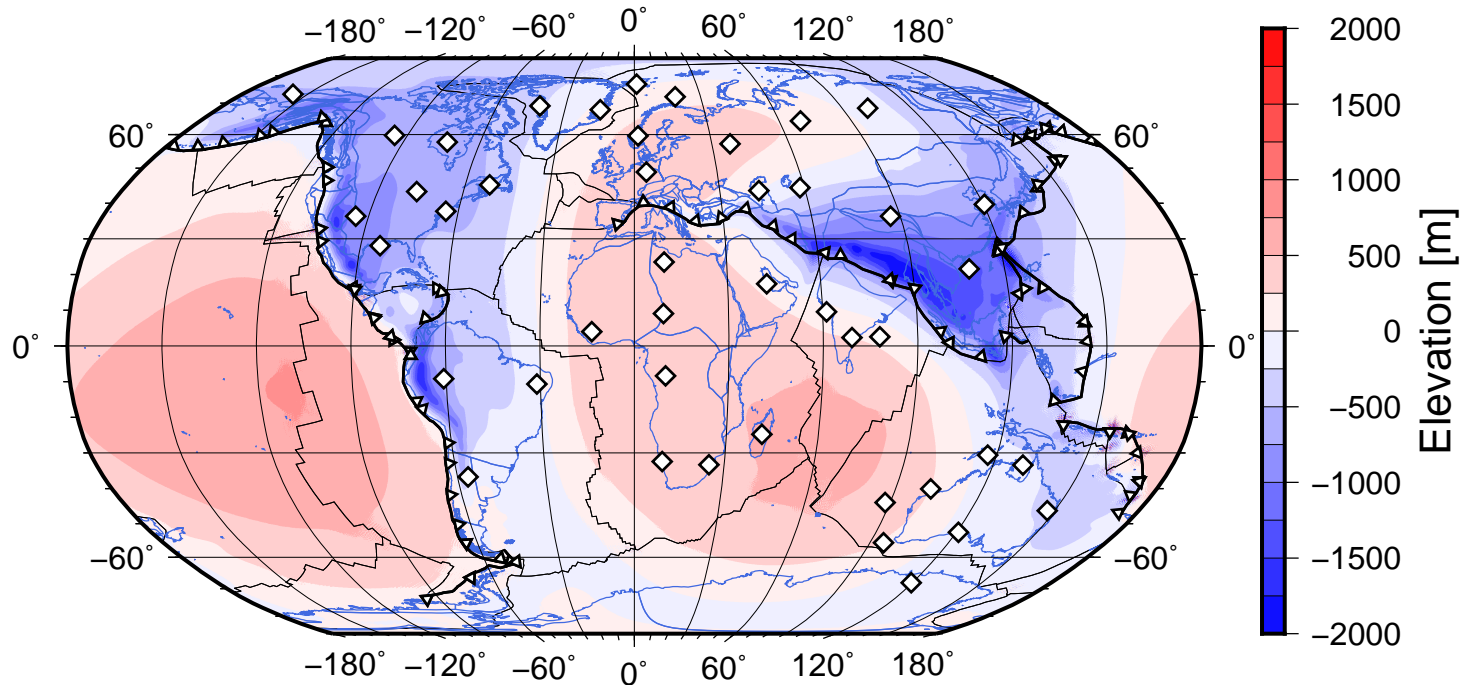

# Dynamic topography at 30 Ma

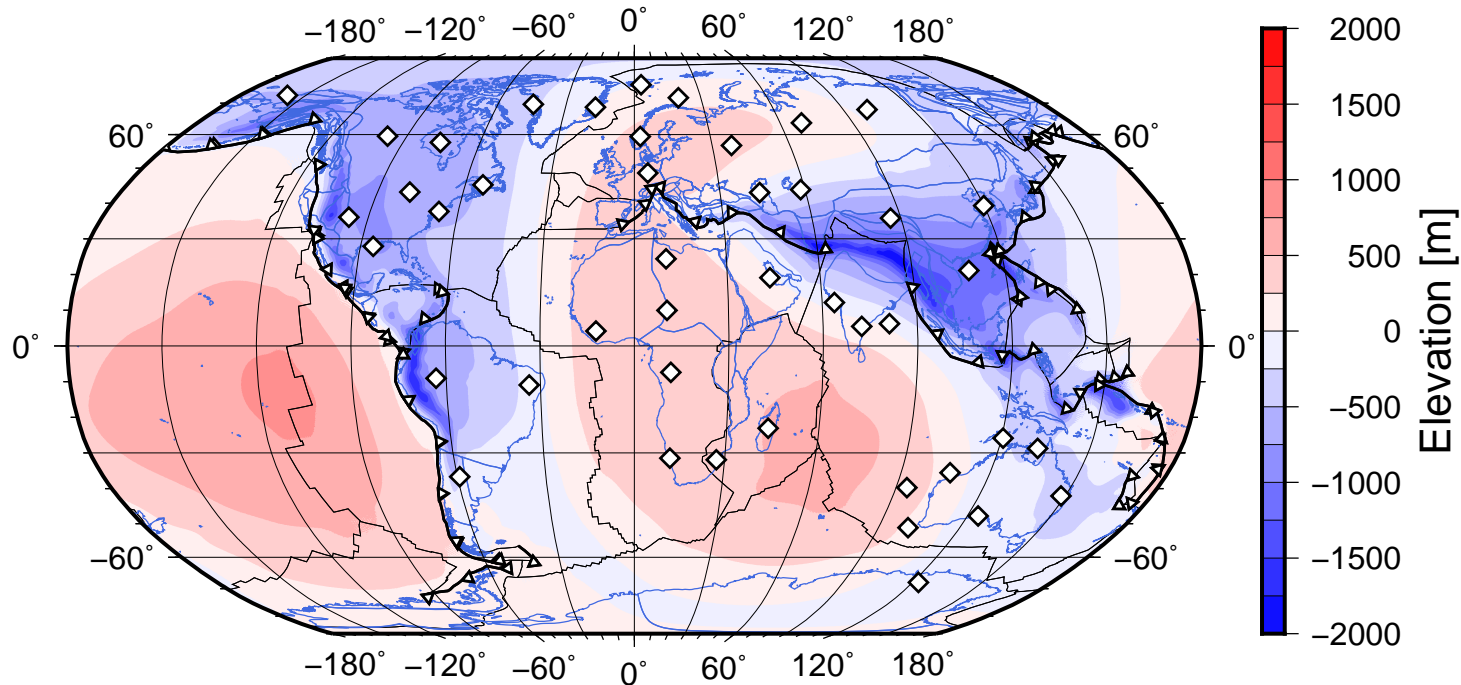

# Dynamic topography at 20 Ma

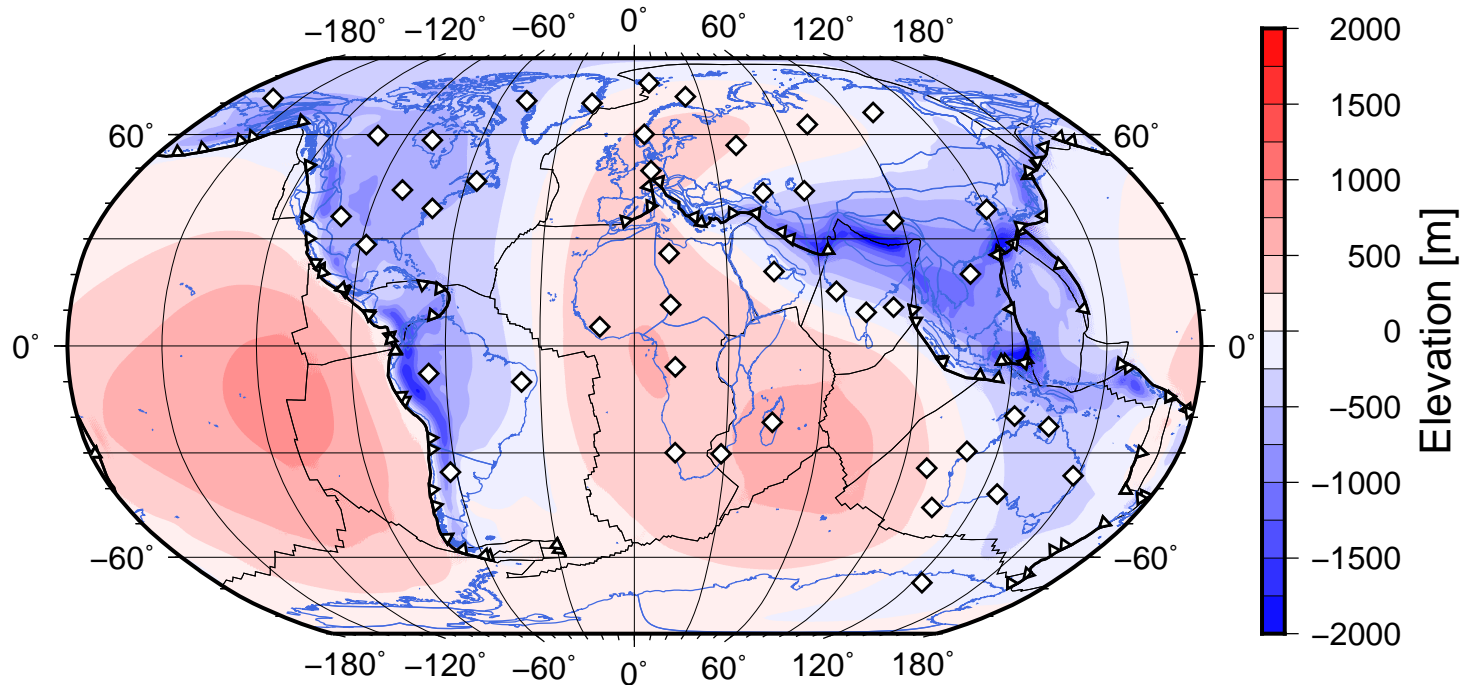

# Dynamic topography at 10 Ma

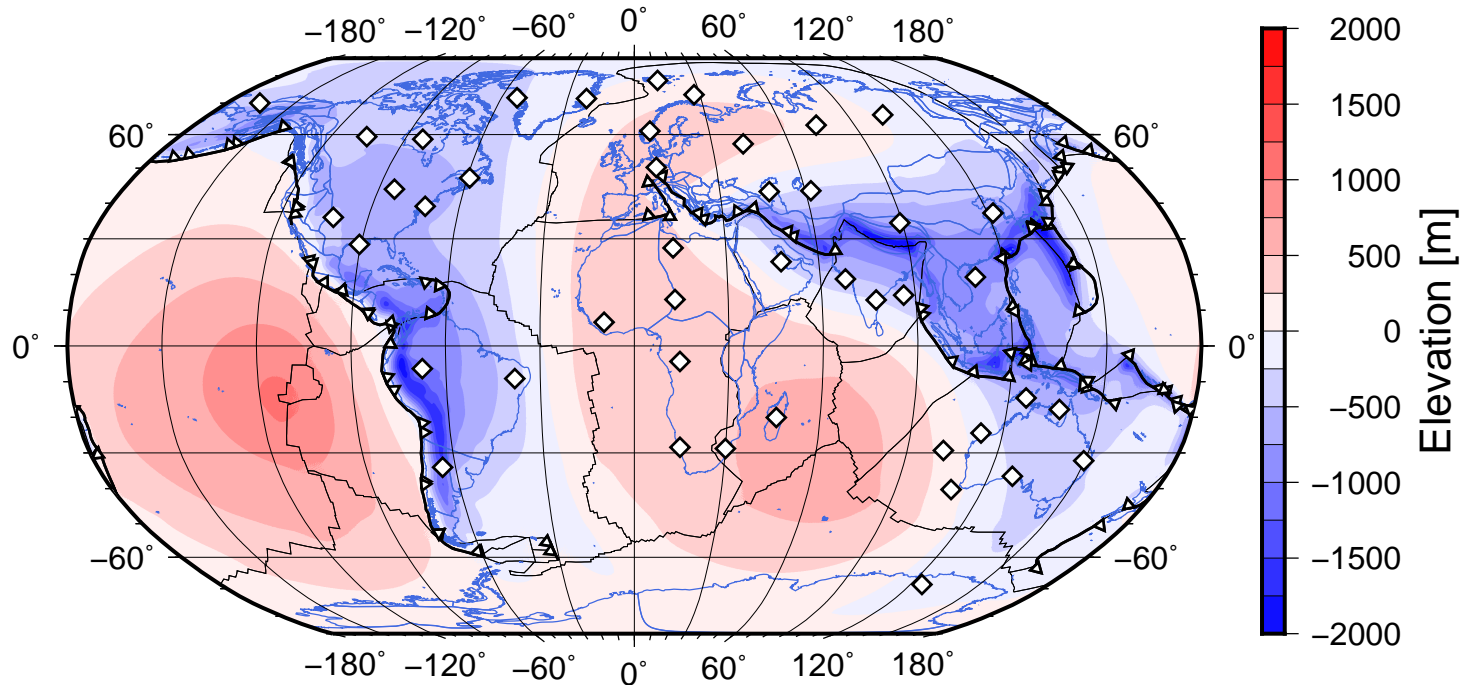

# Dynamic topography at 0 Ma

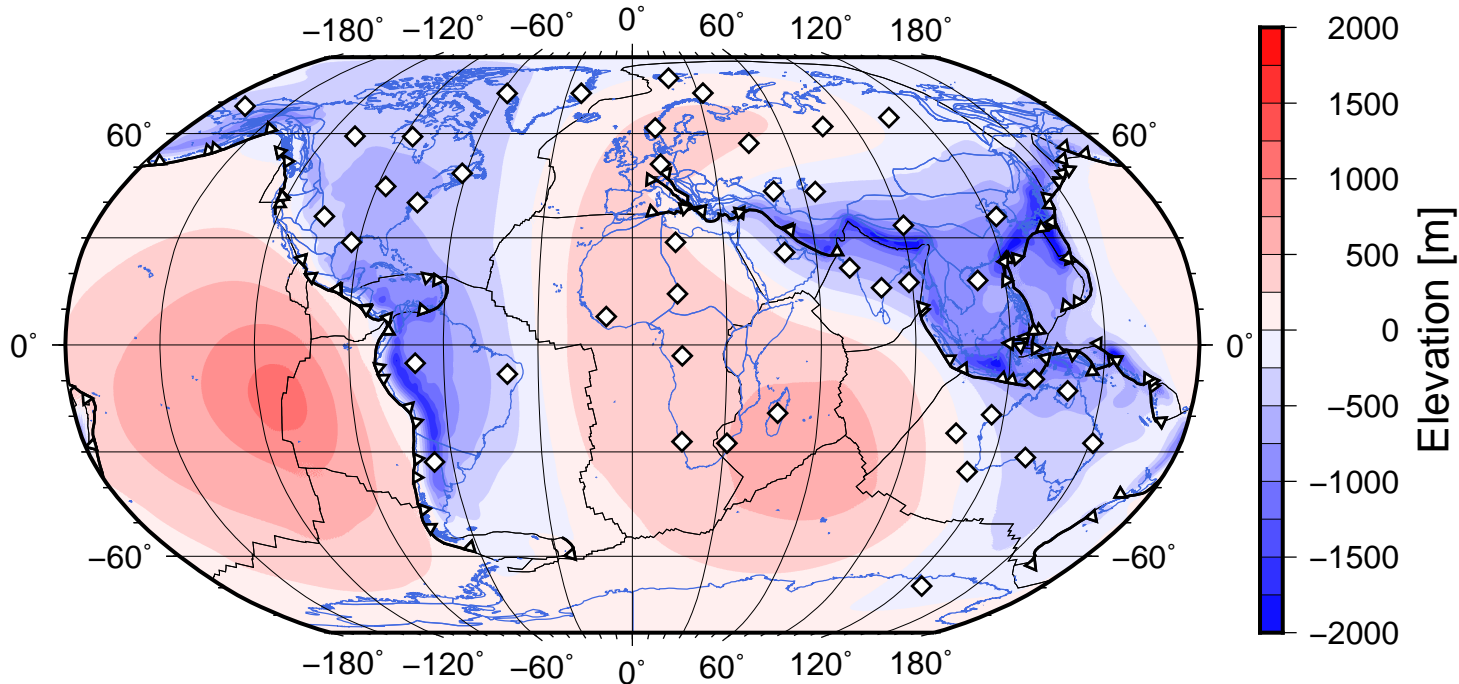

Supplement: Supplementary file 1 [file rubey_m_02_SUPP_DynaTopo_10Myr.pdf › Pics_App_FINAL/rubey_m_02_SUPP_DynaTopo_10Myr.pdf]
