# Supplementary material for: Global patterns of Earth's dynamic topography since the Jurassic
Source: Copernicus journal article supplement (doi:10.5194/se-2017-26), 2017-03-23

Dynamic topography at 200 Ma

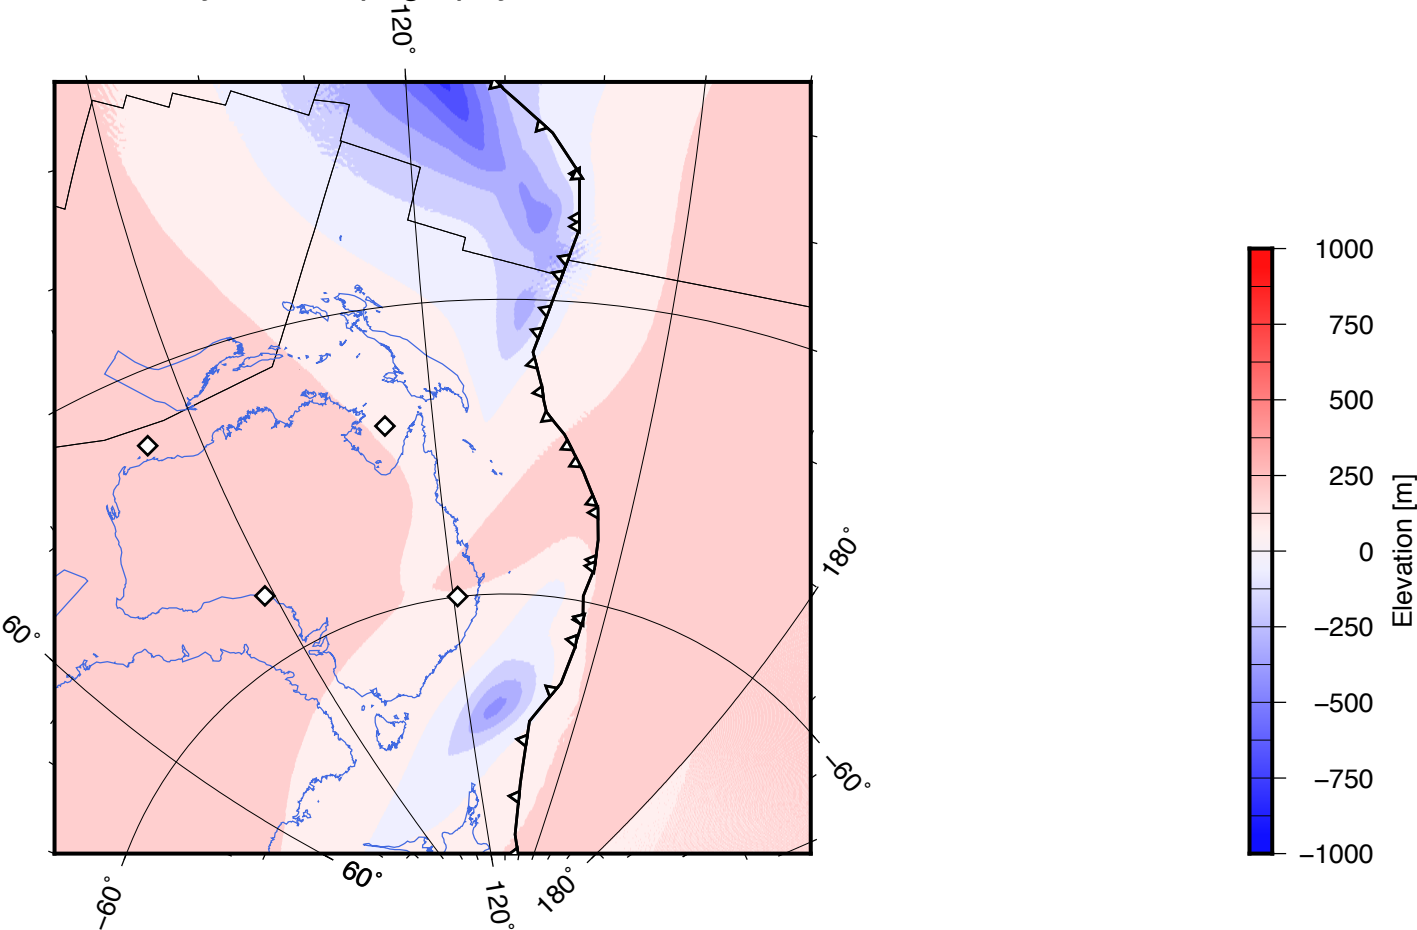

Dynamic topography at 190 Ma

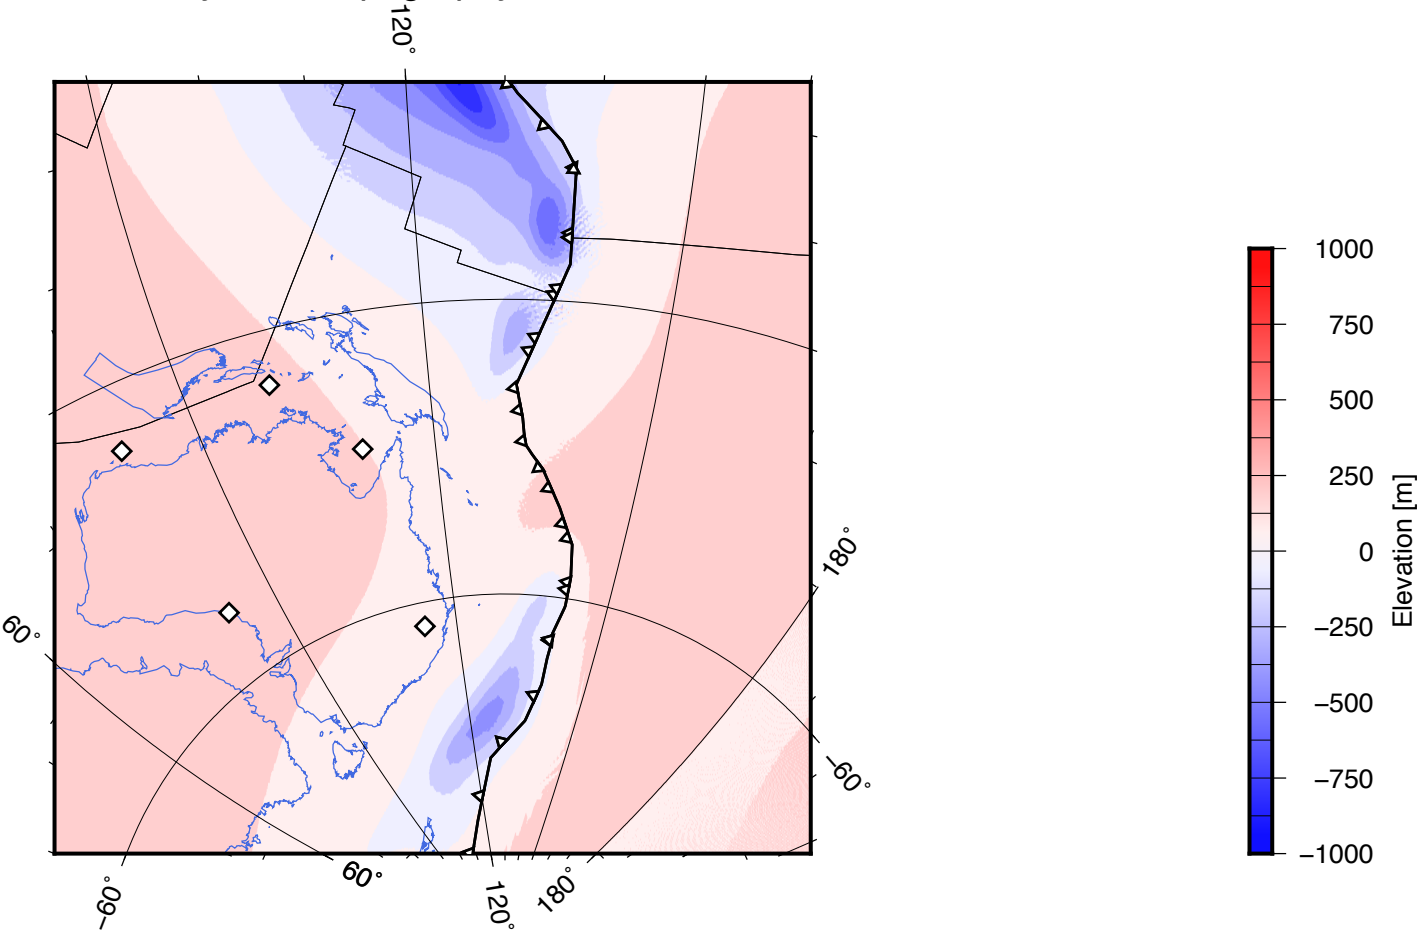

Dynamic topography at 180 Ma

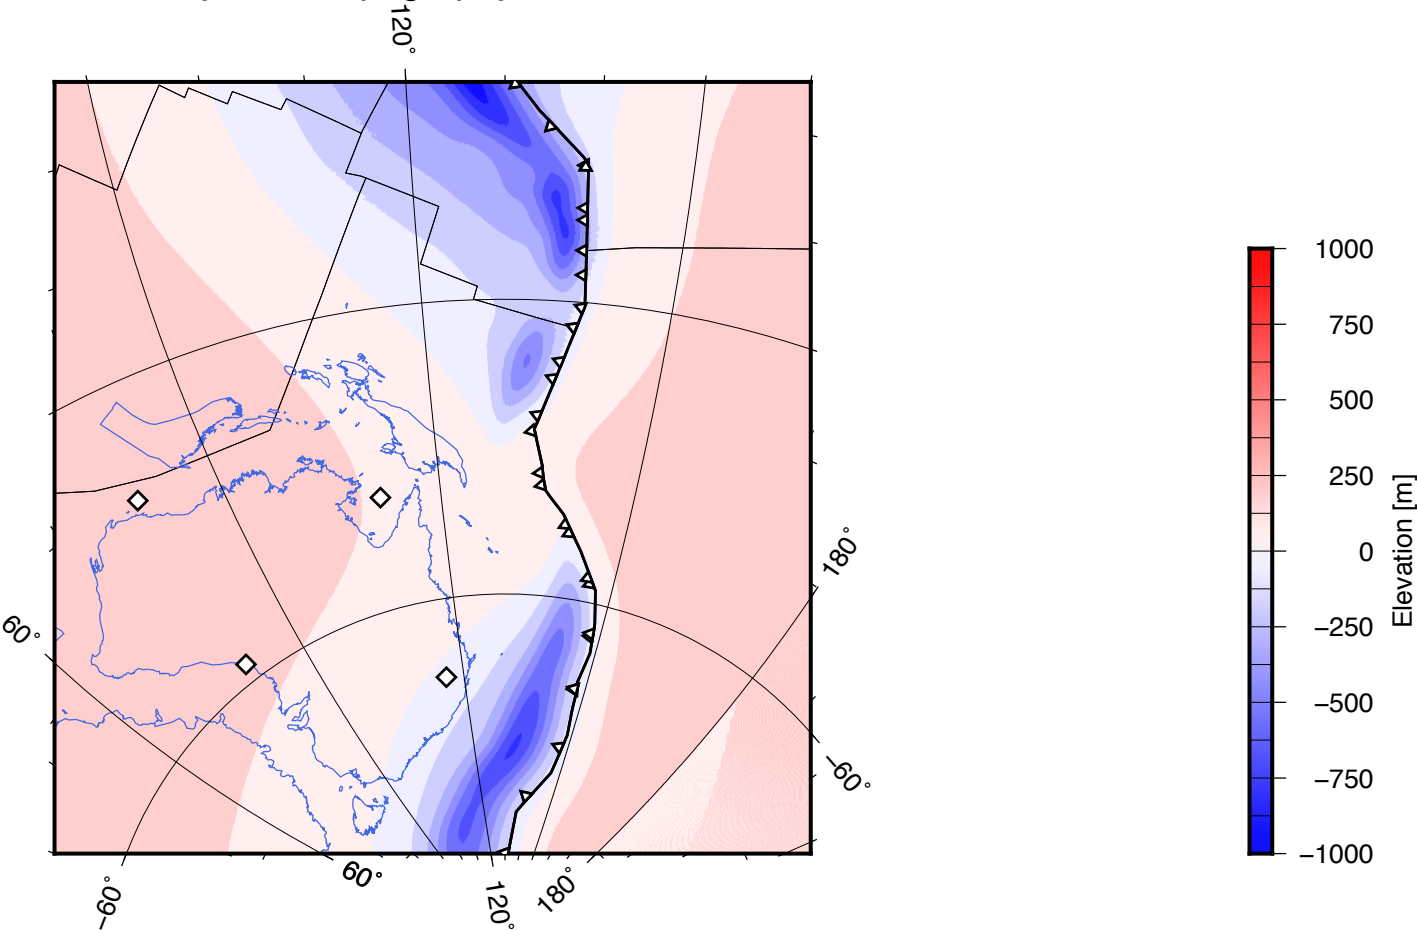

Dynamic topography at 170 Ma

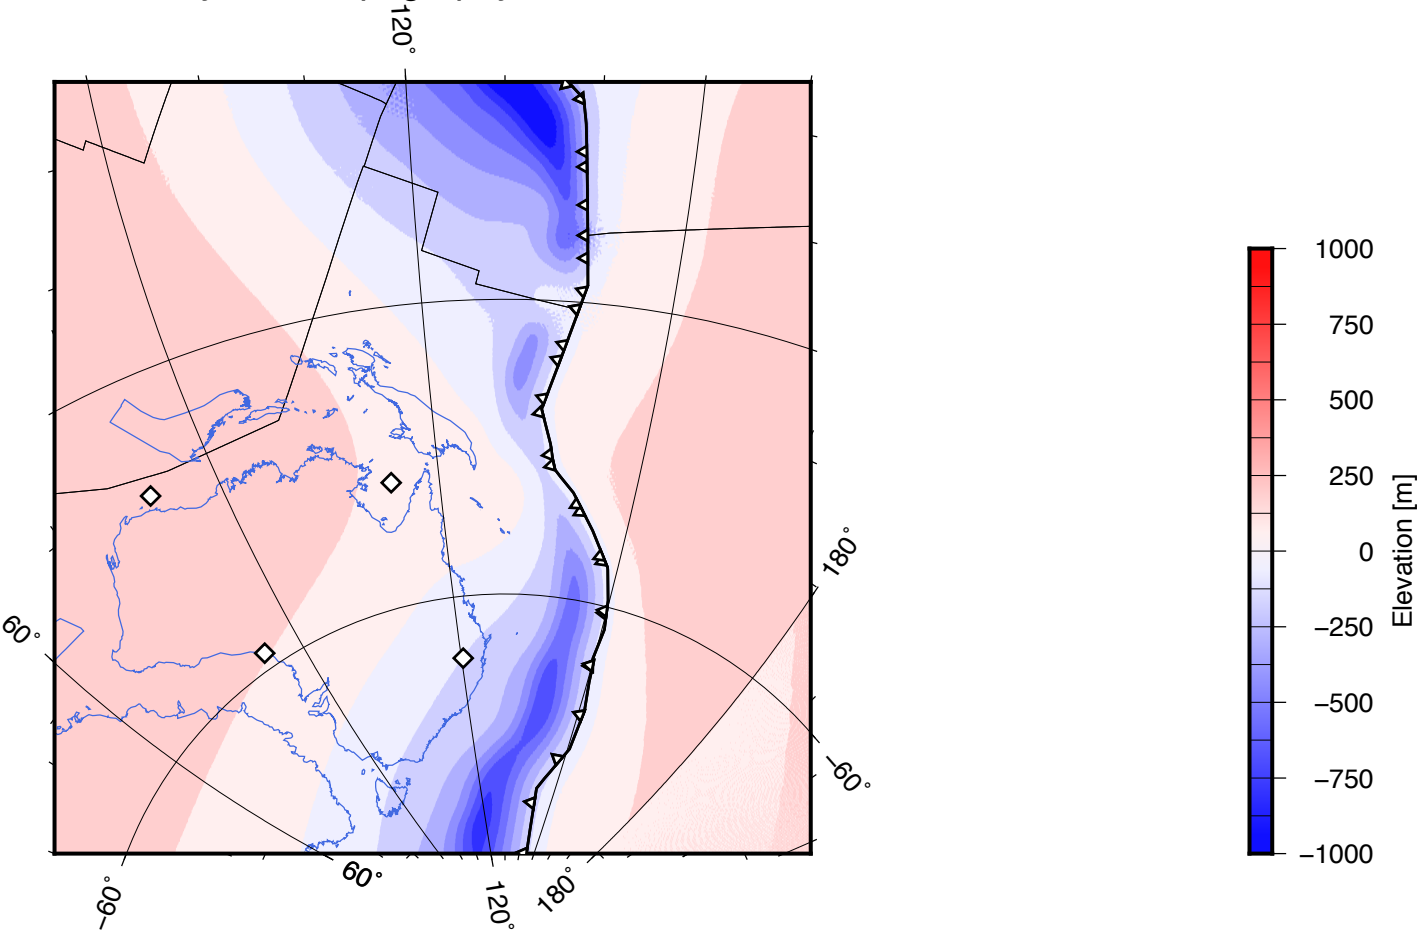

Dynamic topography at 160 Ma

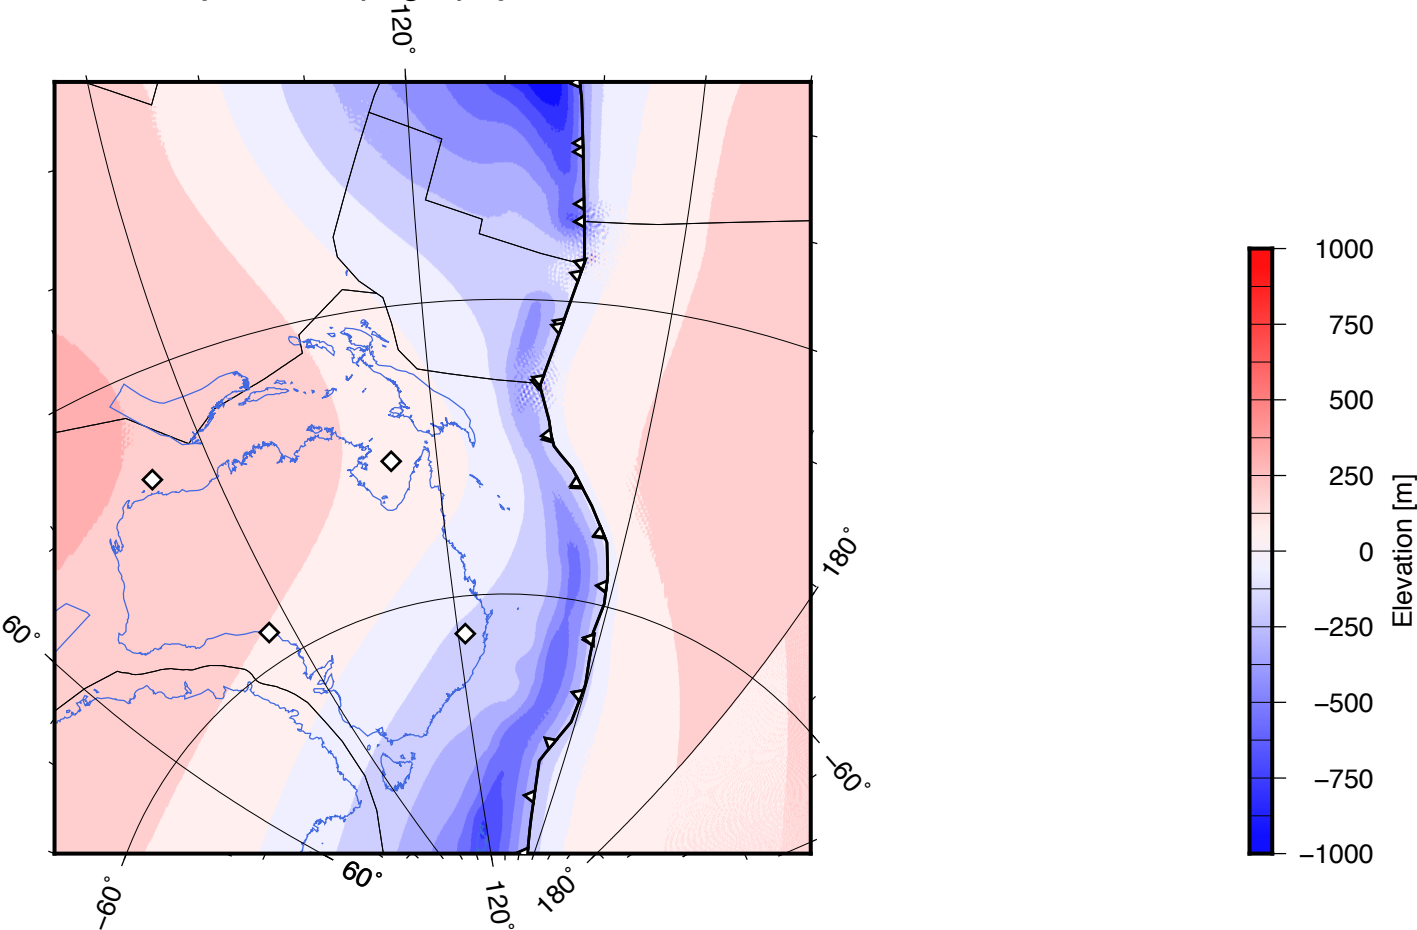

Dynamic topography at 150 Ma

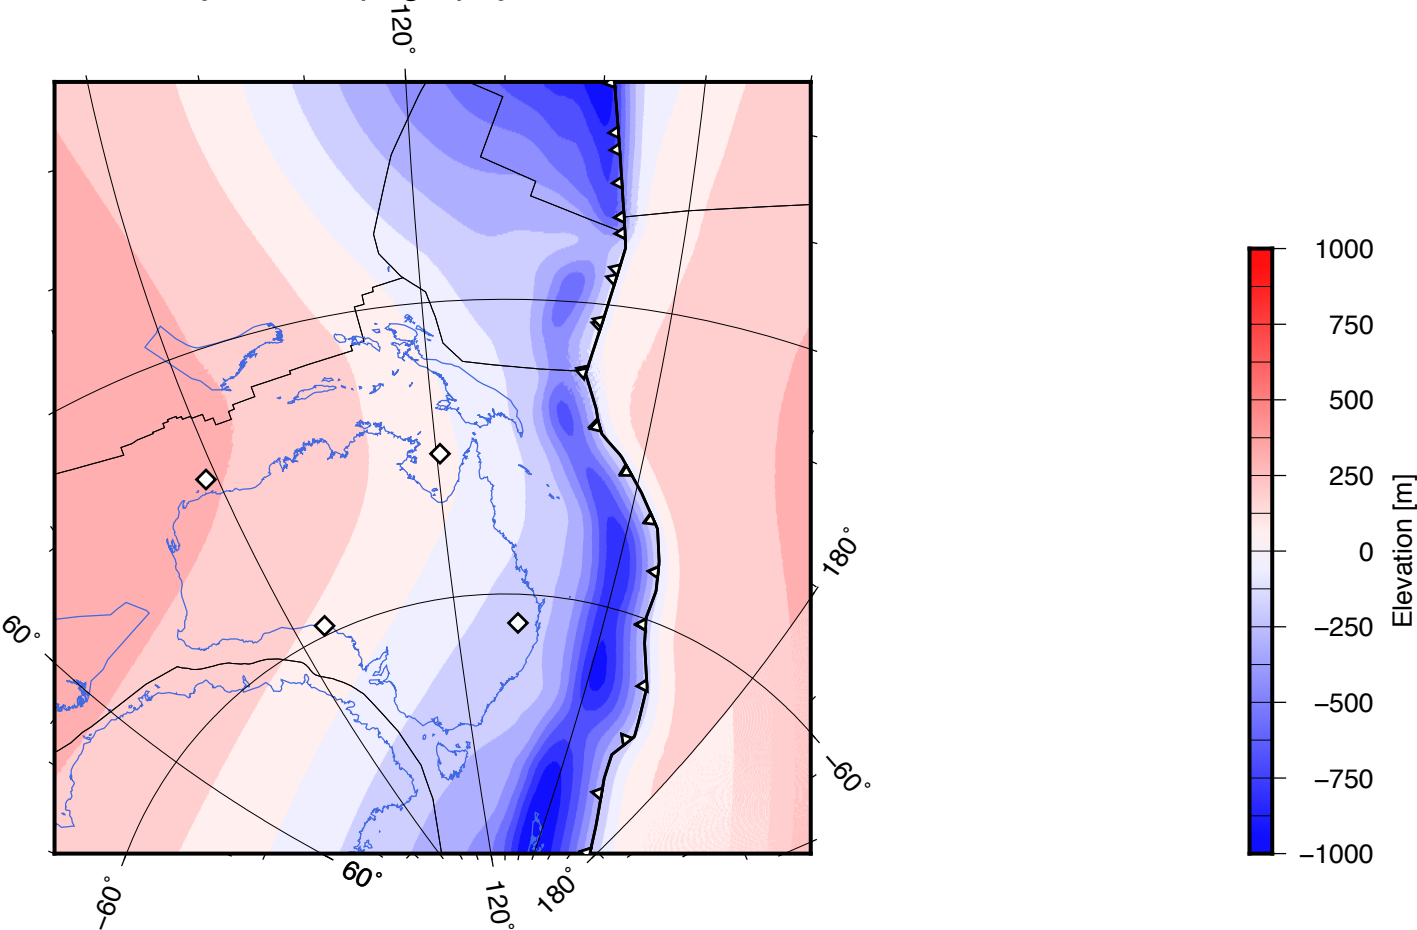

Dynamic topography at 140 Ma

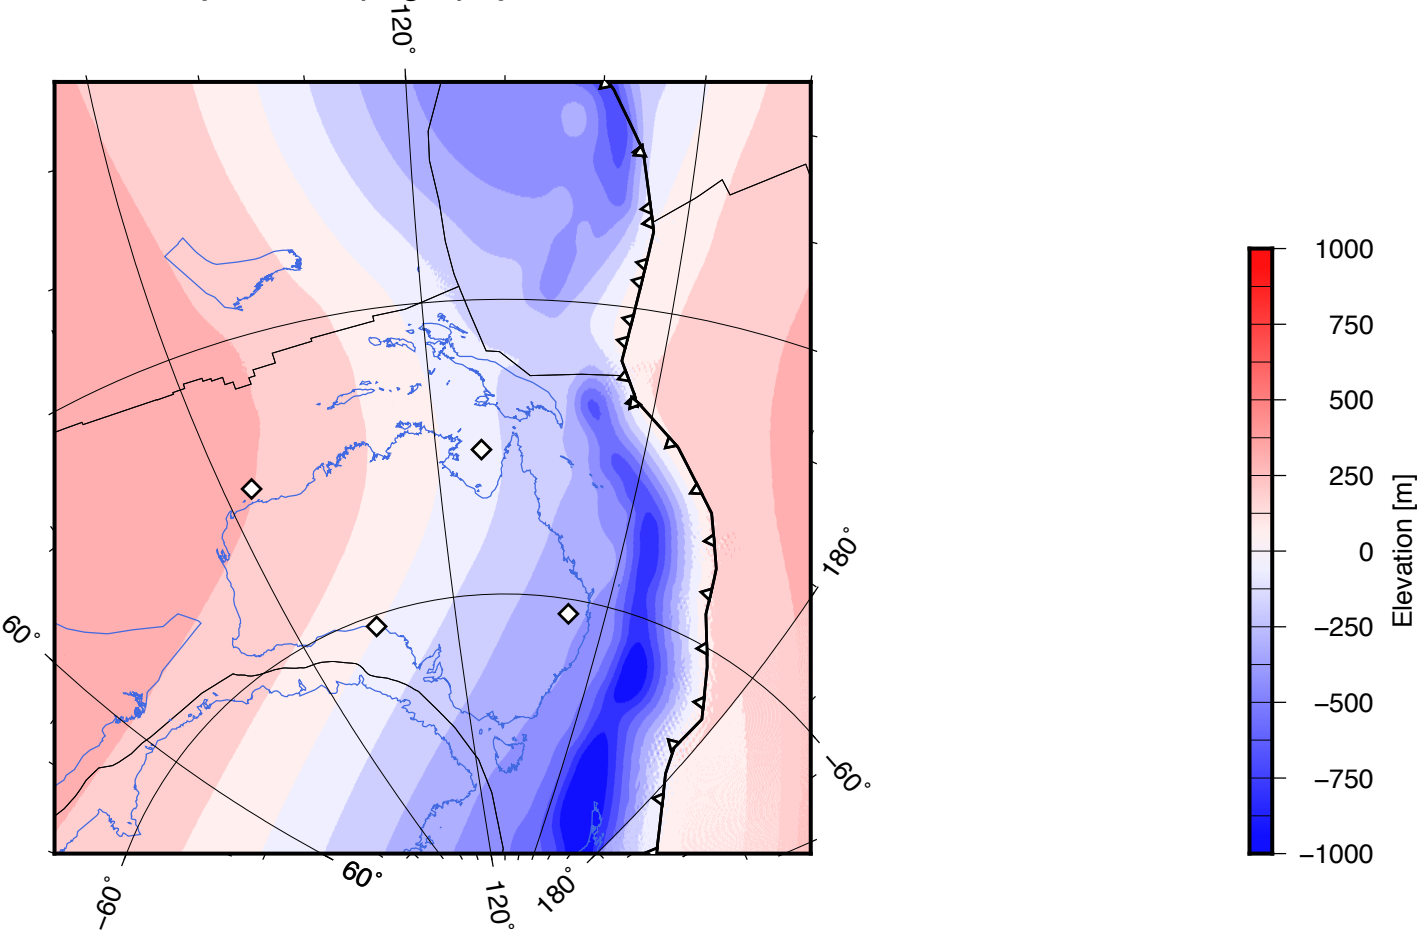

Dynamic topography at 130 Ma

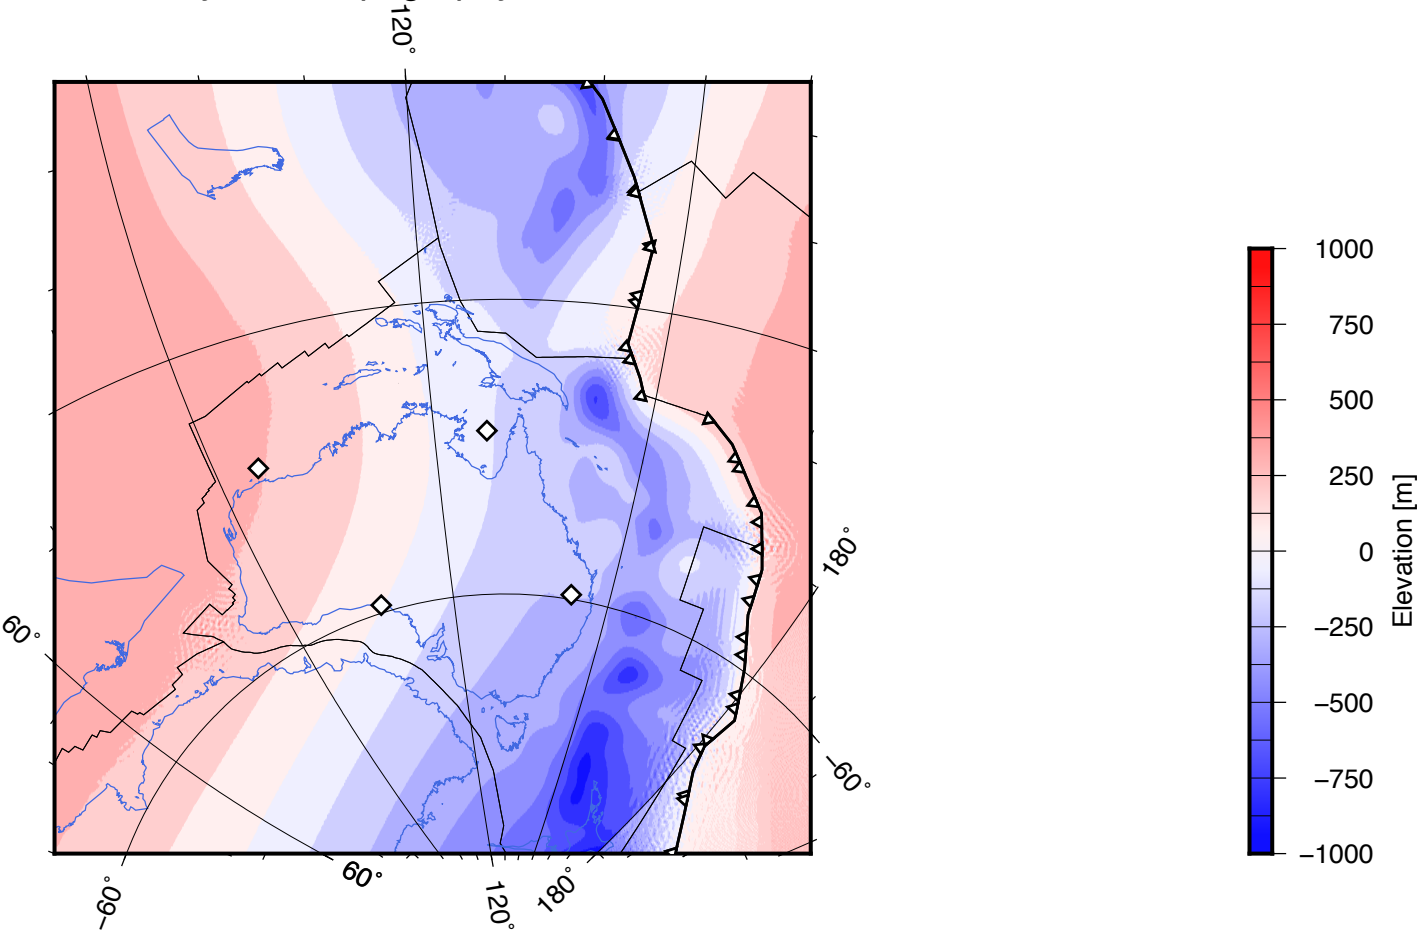



Dynamic topography at 120 Ma

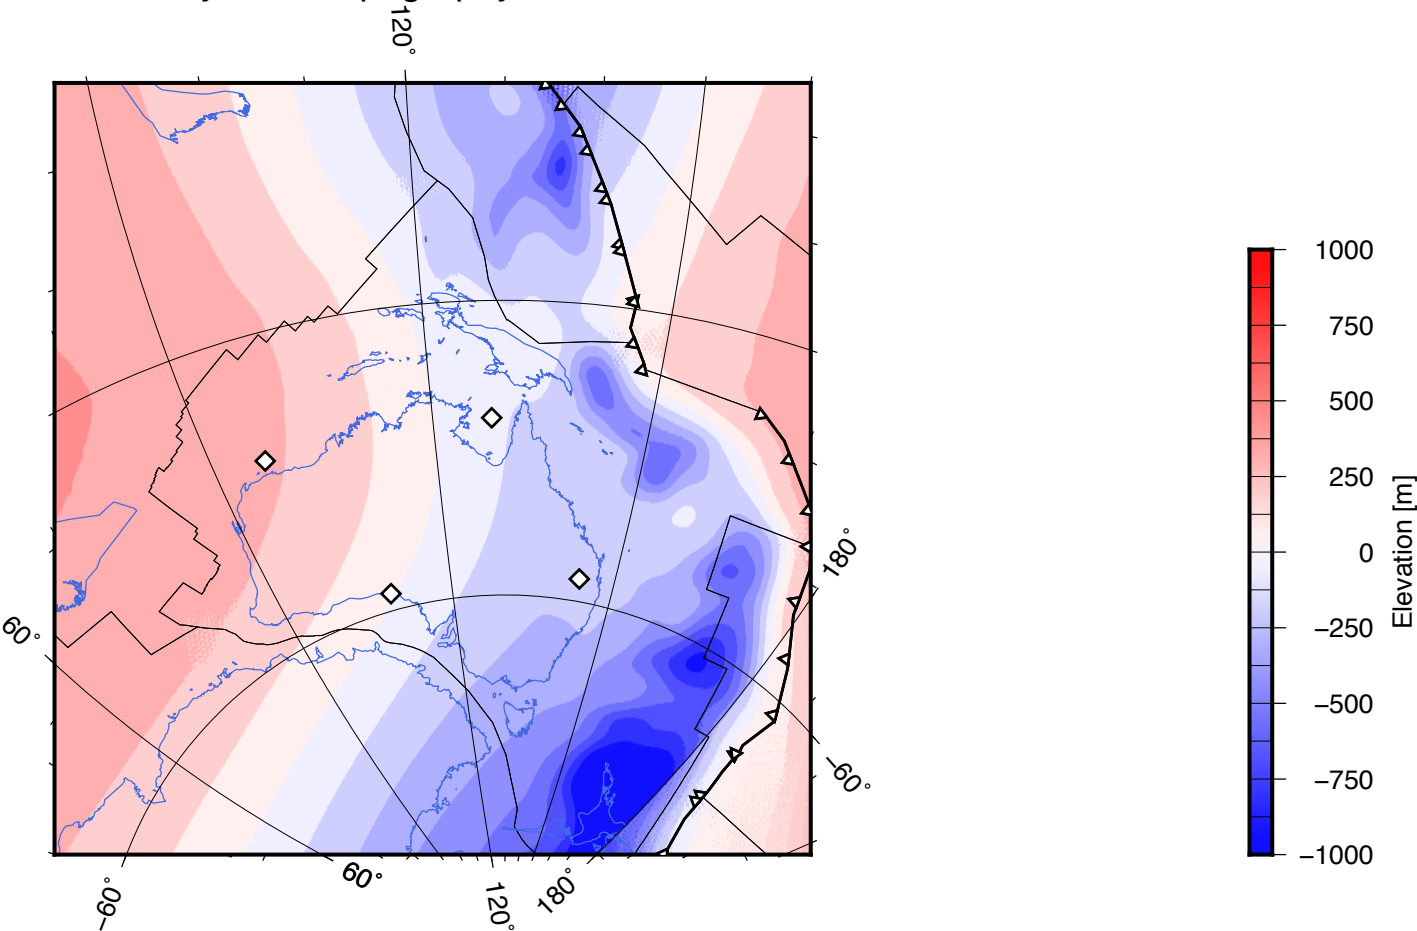

Dynamic topography at 120 Ma

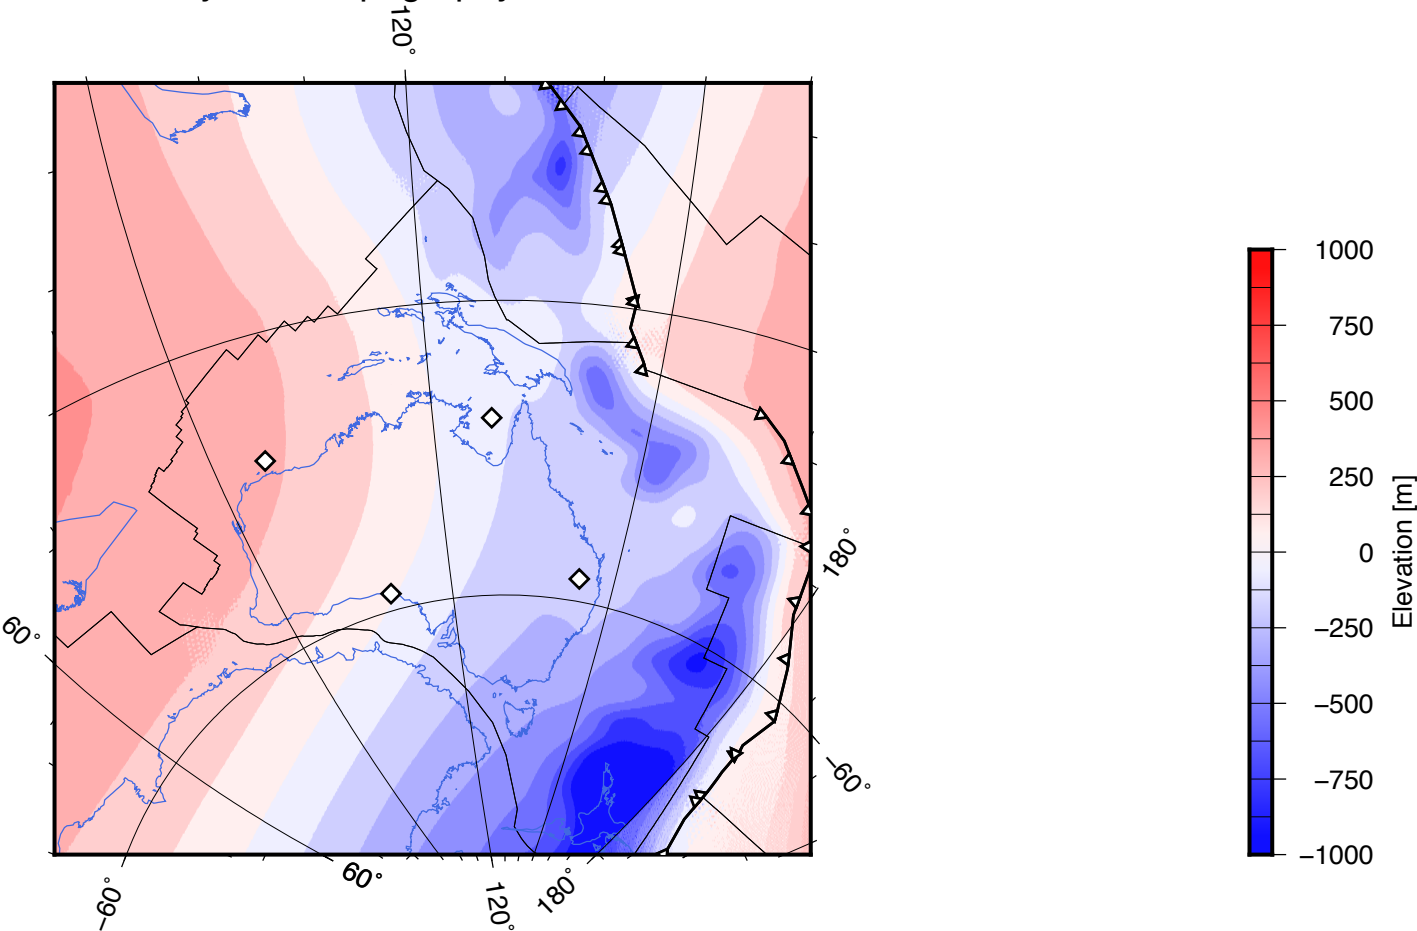

Dynamic topography at 100 Ma

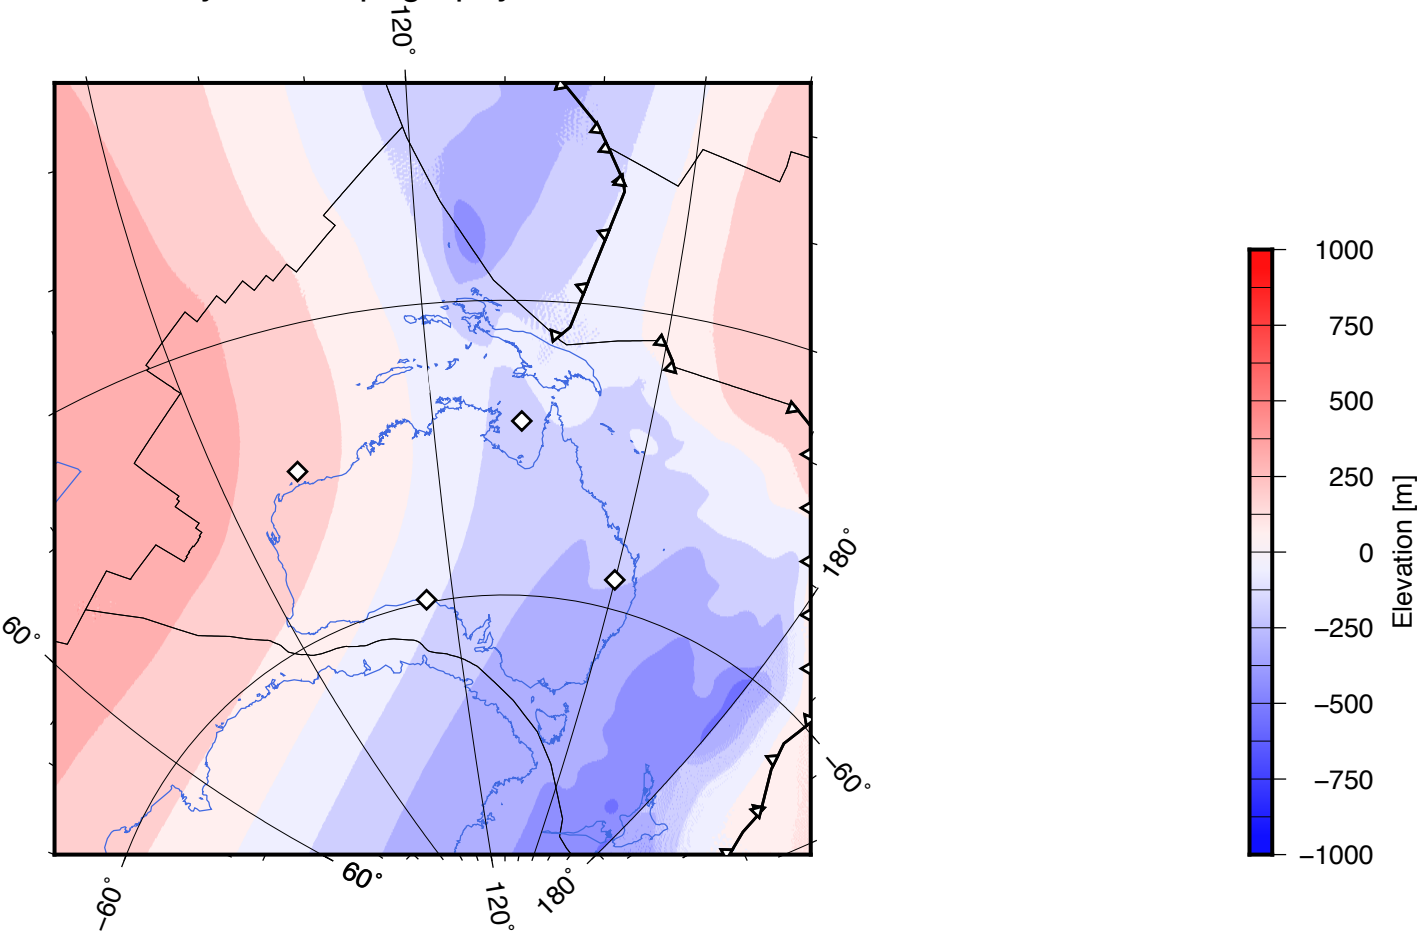

Dynamic topography at 90 Ma

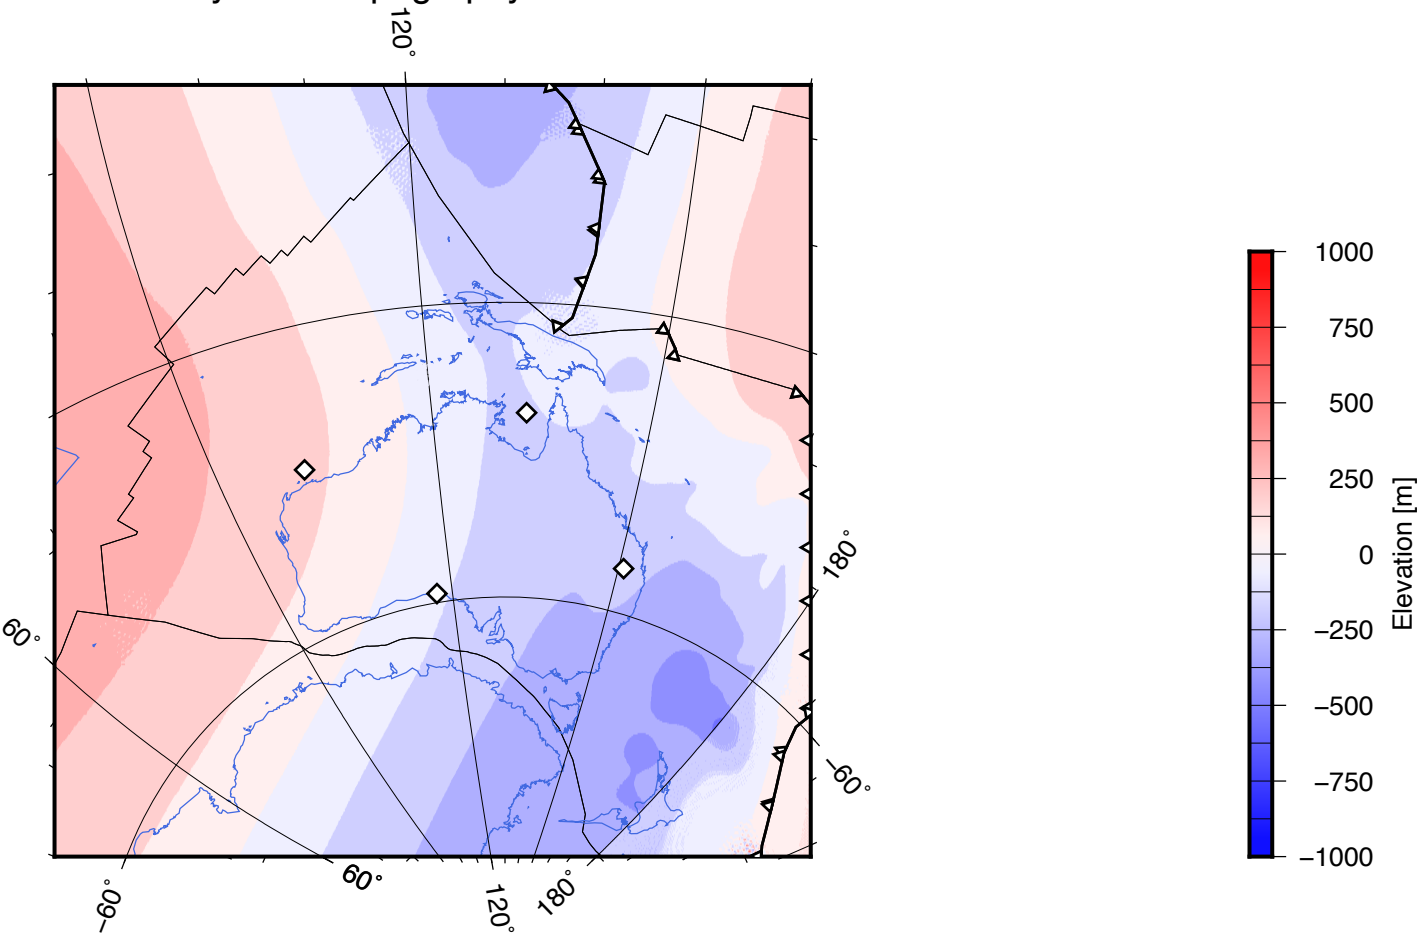

Dynamic topography at 80 Ma

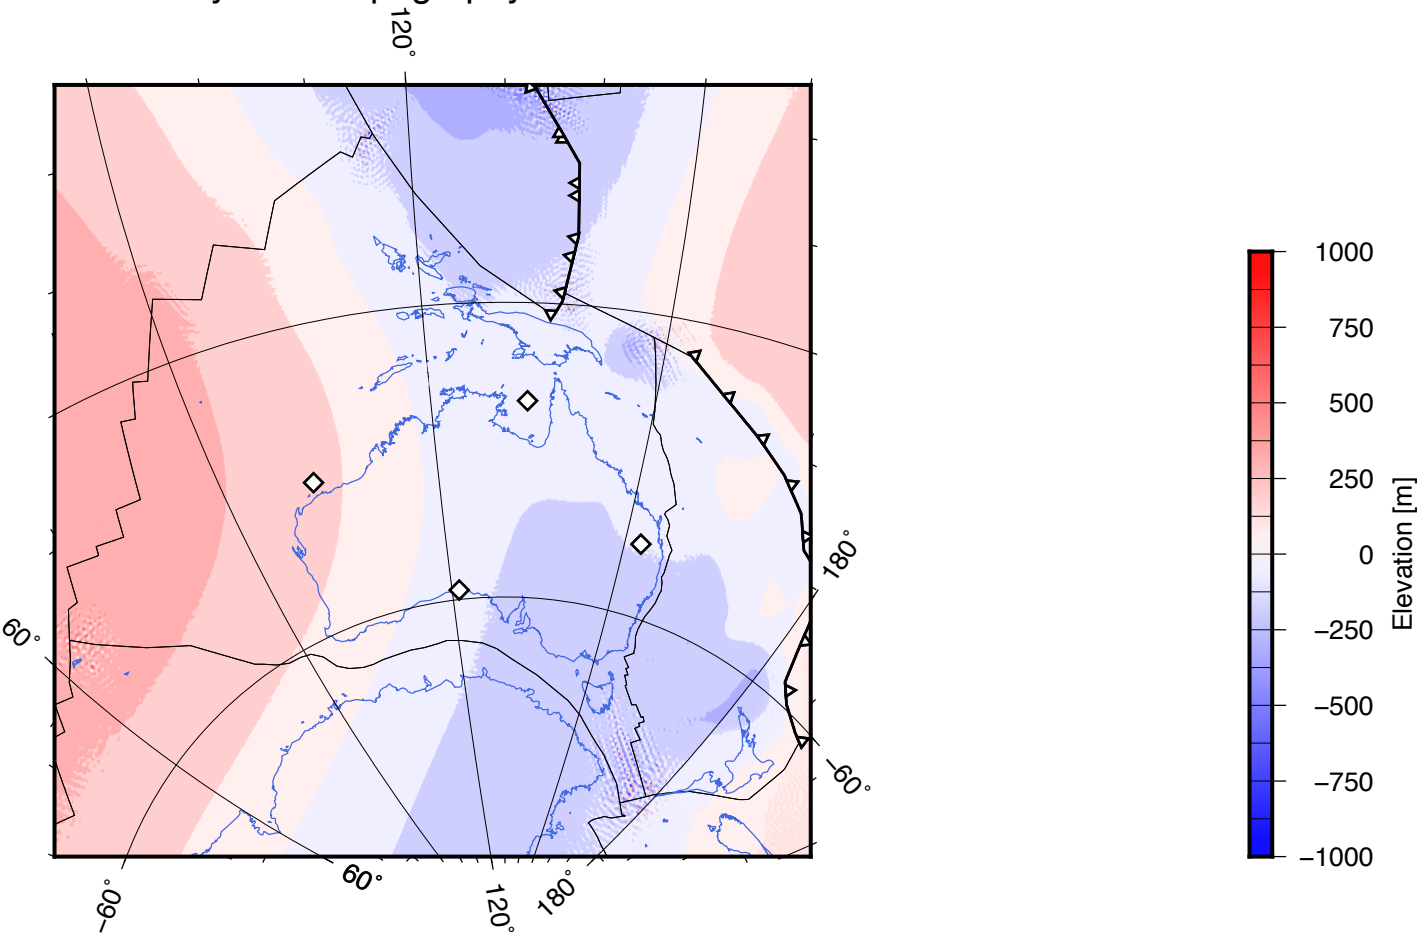

Dynamic topography at 70 Ma

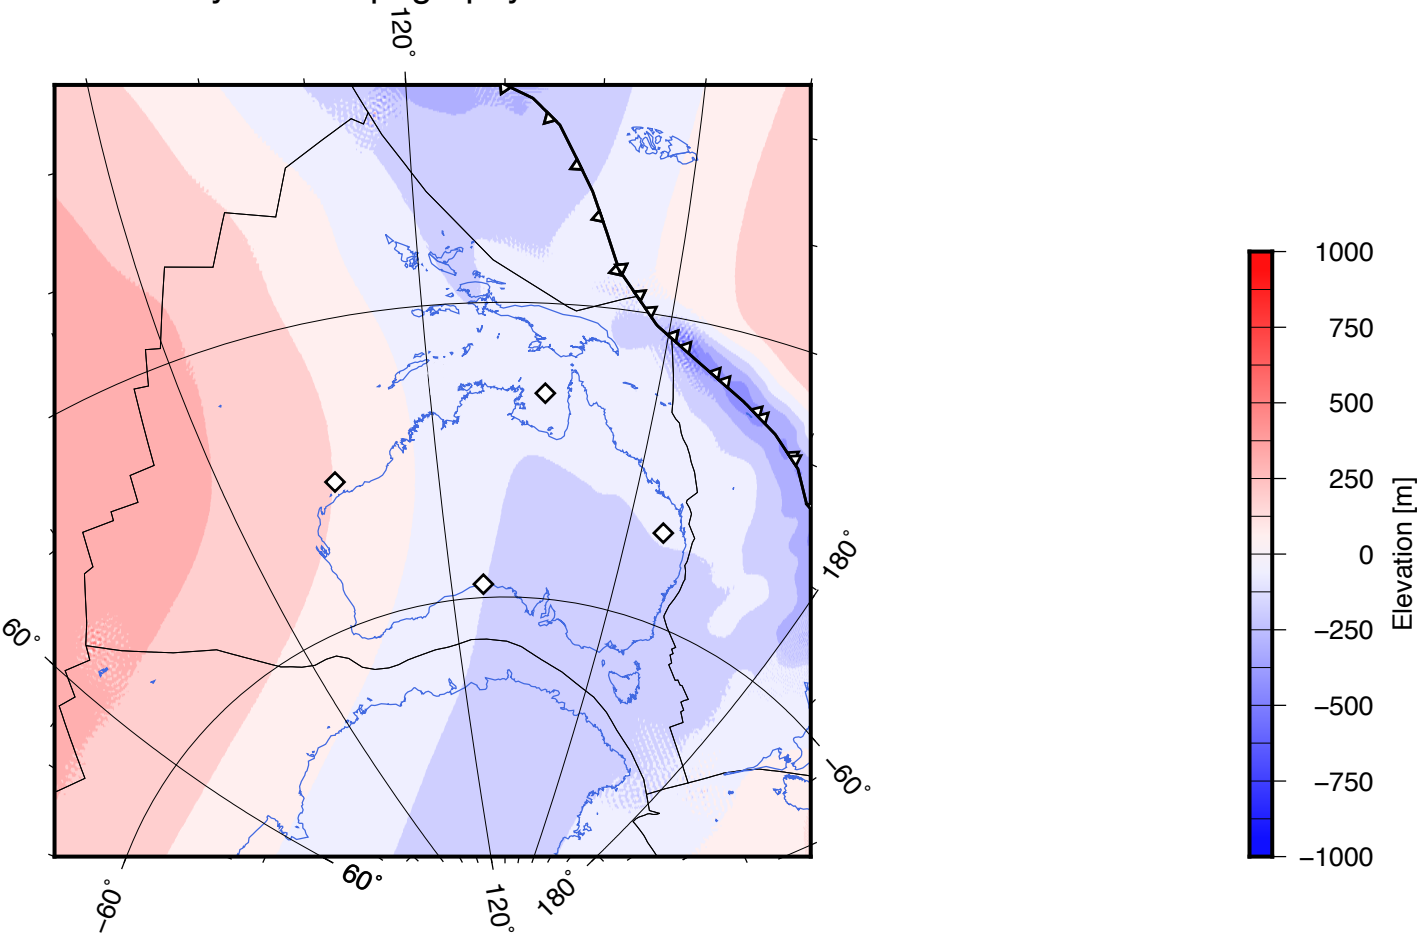

Dynamic topography at 60 Ma

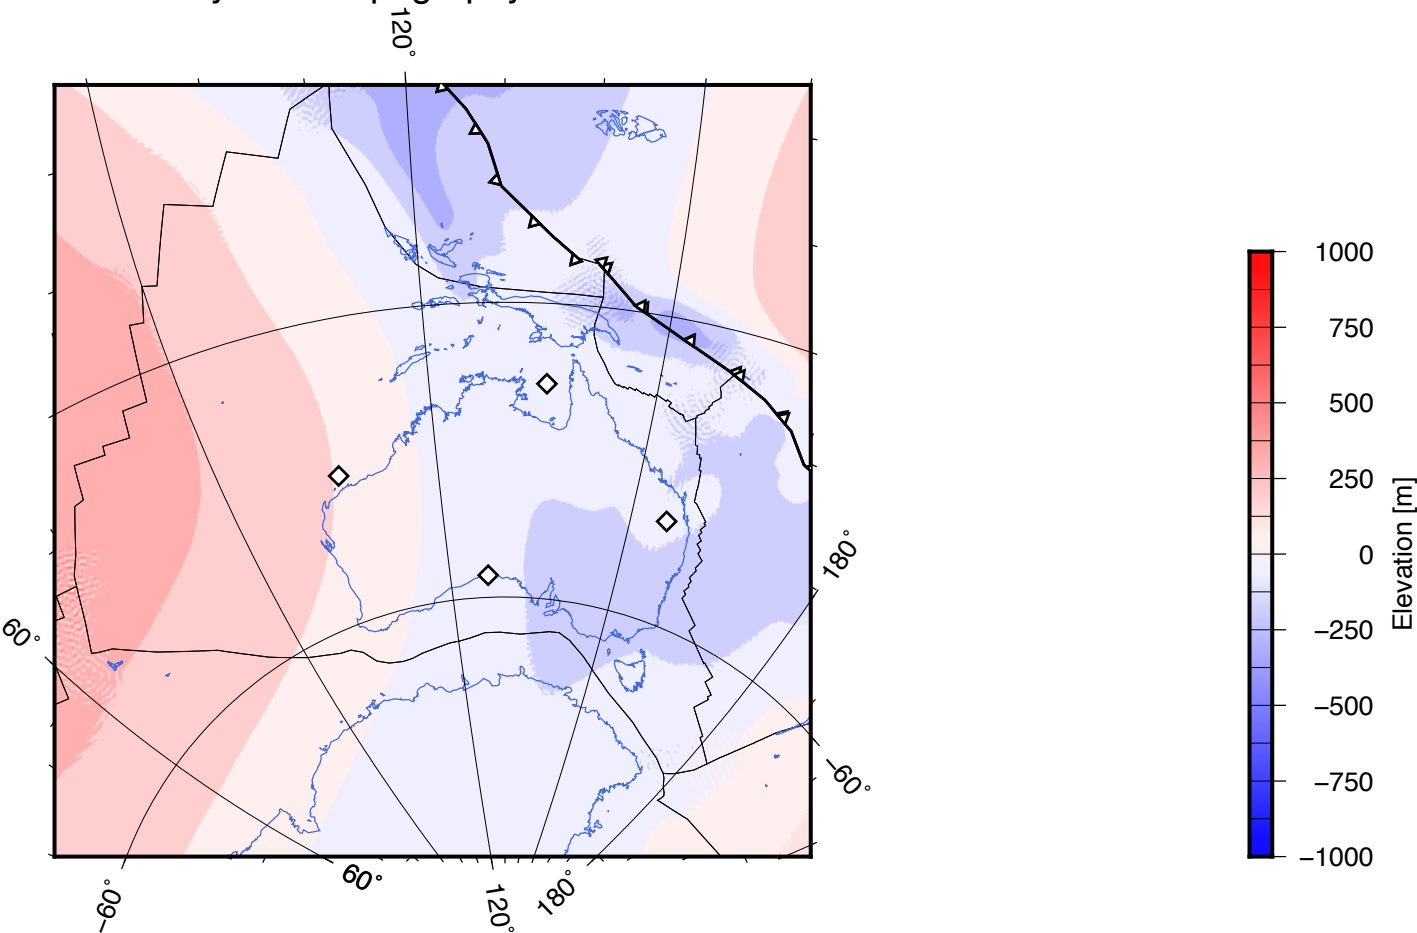

Dynamic topography at 50 Ma

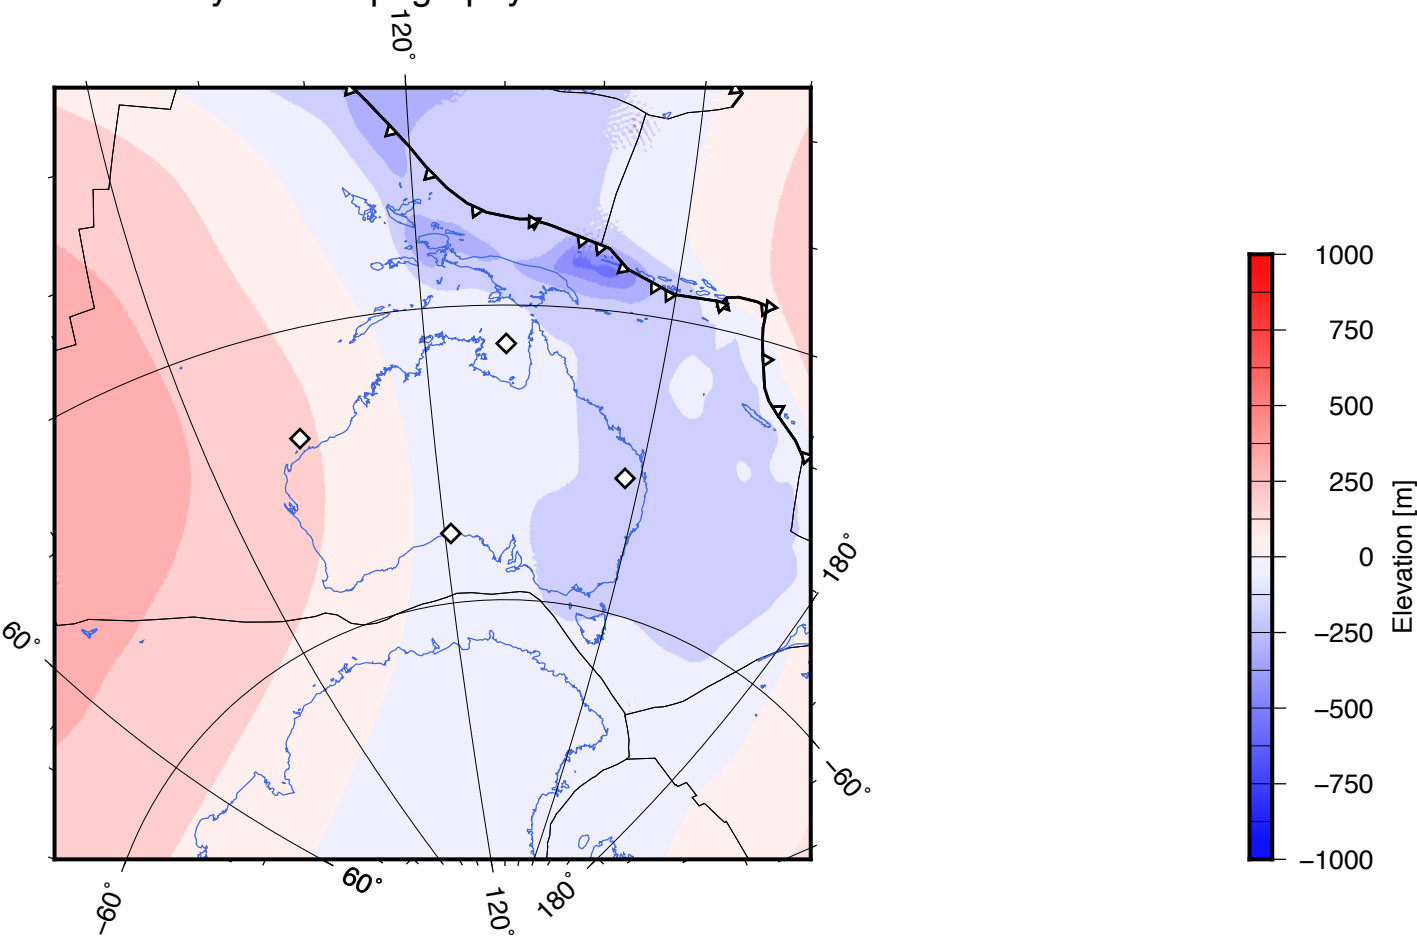



Dynamic topography at 40 Ma

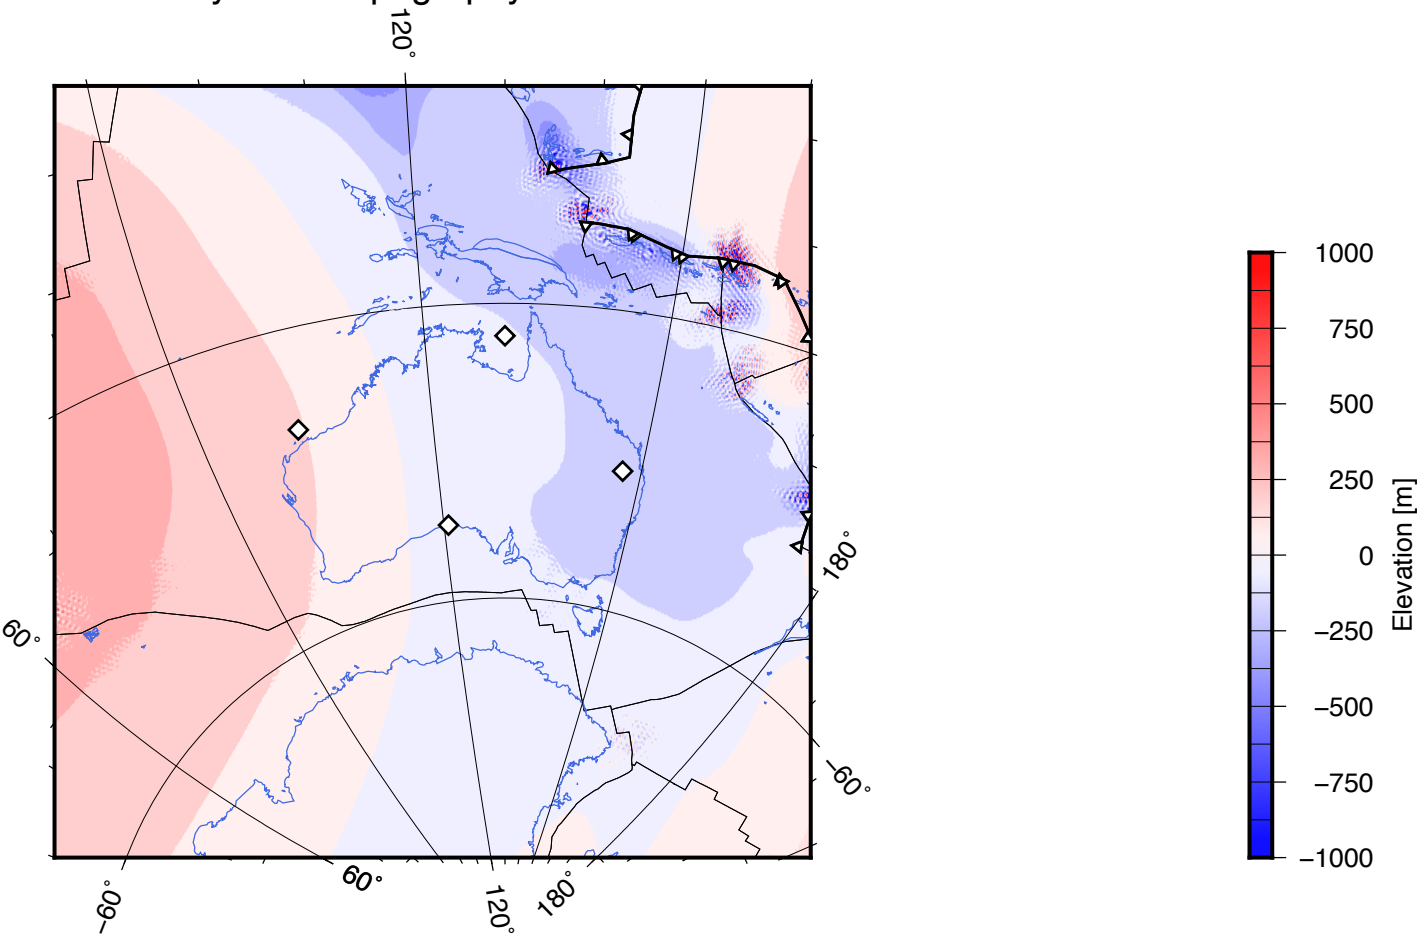

Dynamic topography at 30 Ma

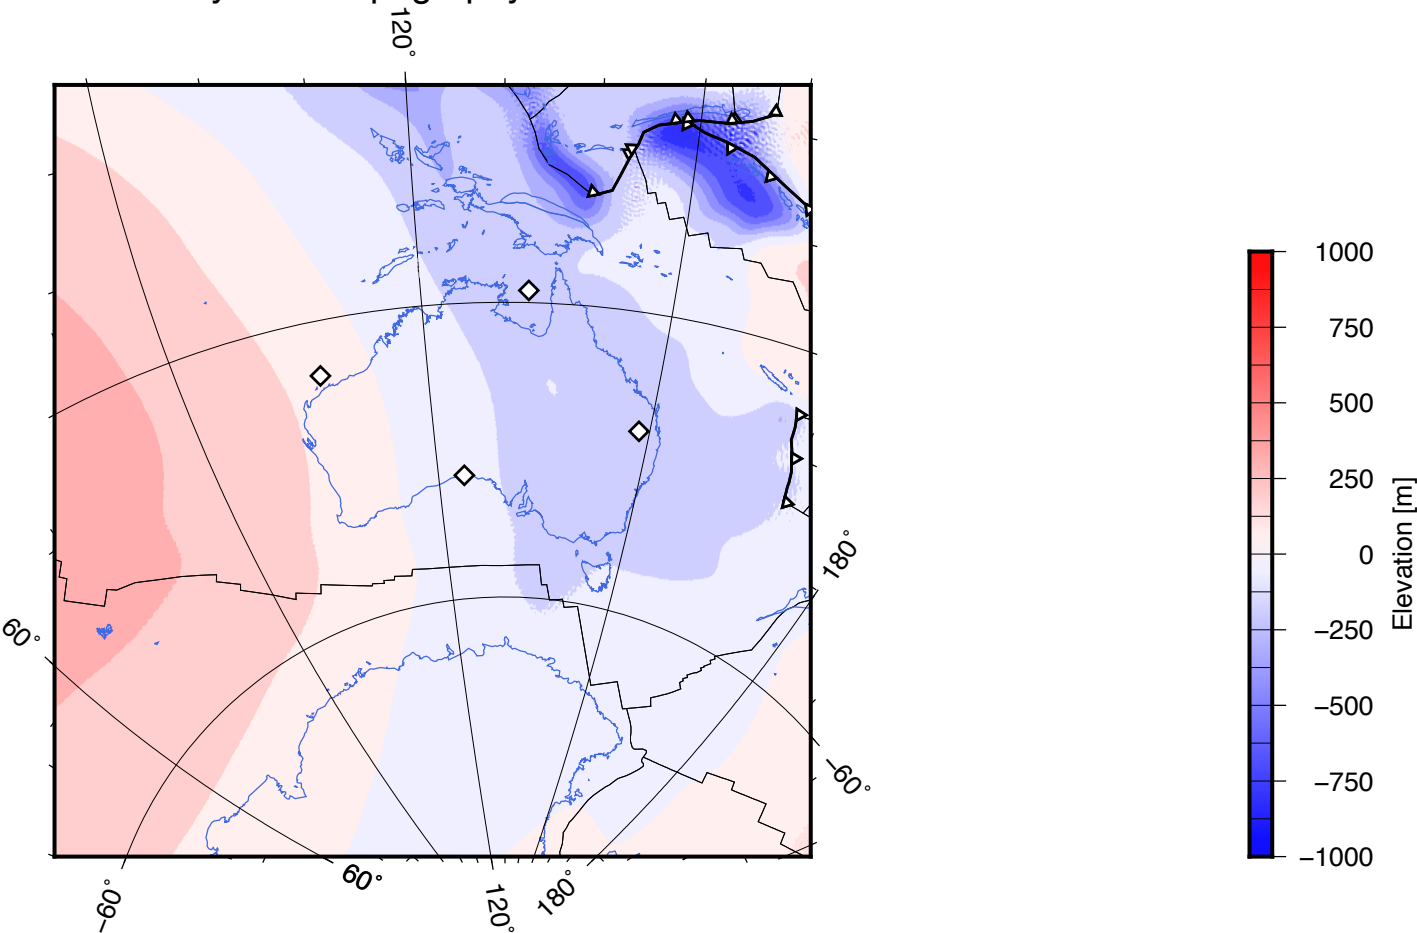

Dynamic topography at 20 Ma

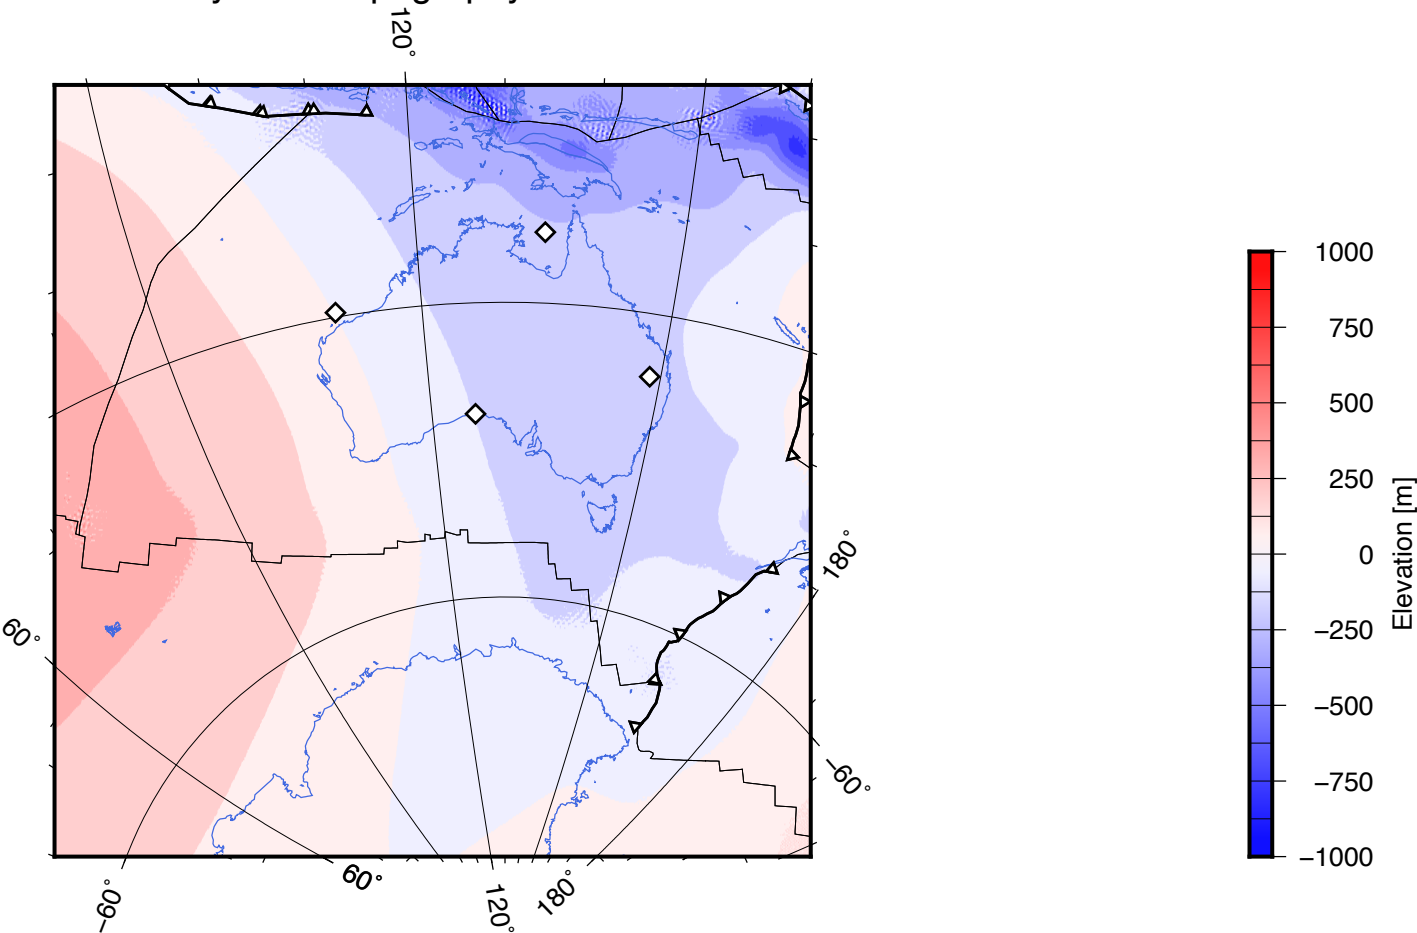

Dynamic topography at 10 Ma

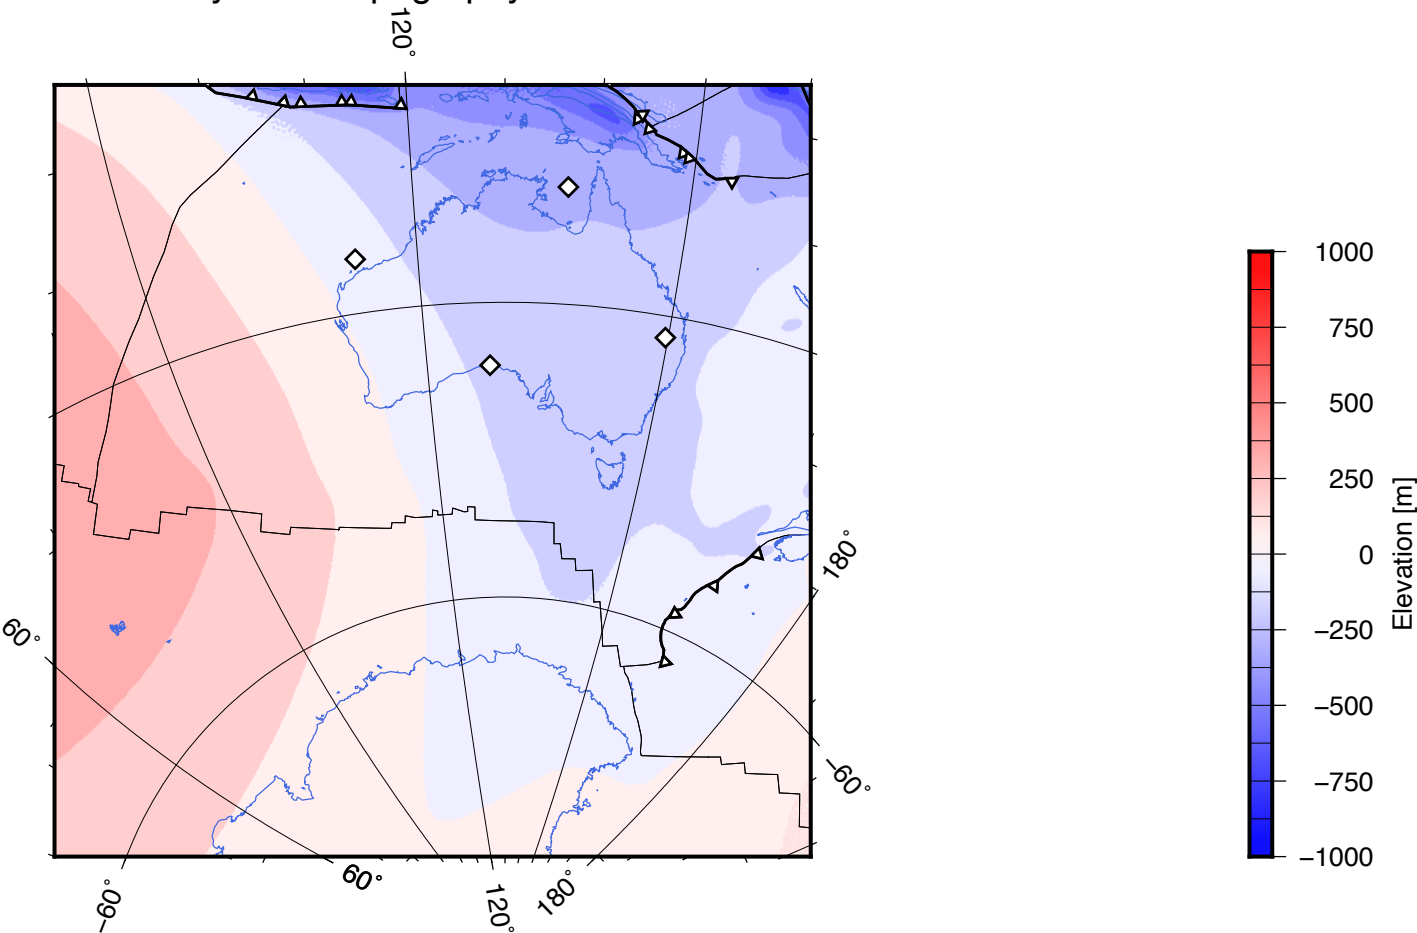

Dynamic topography at 0 Ma

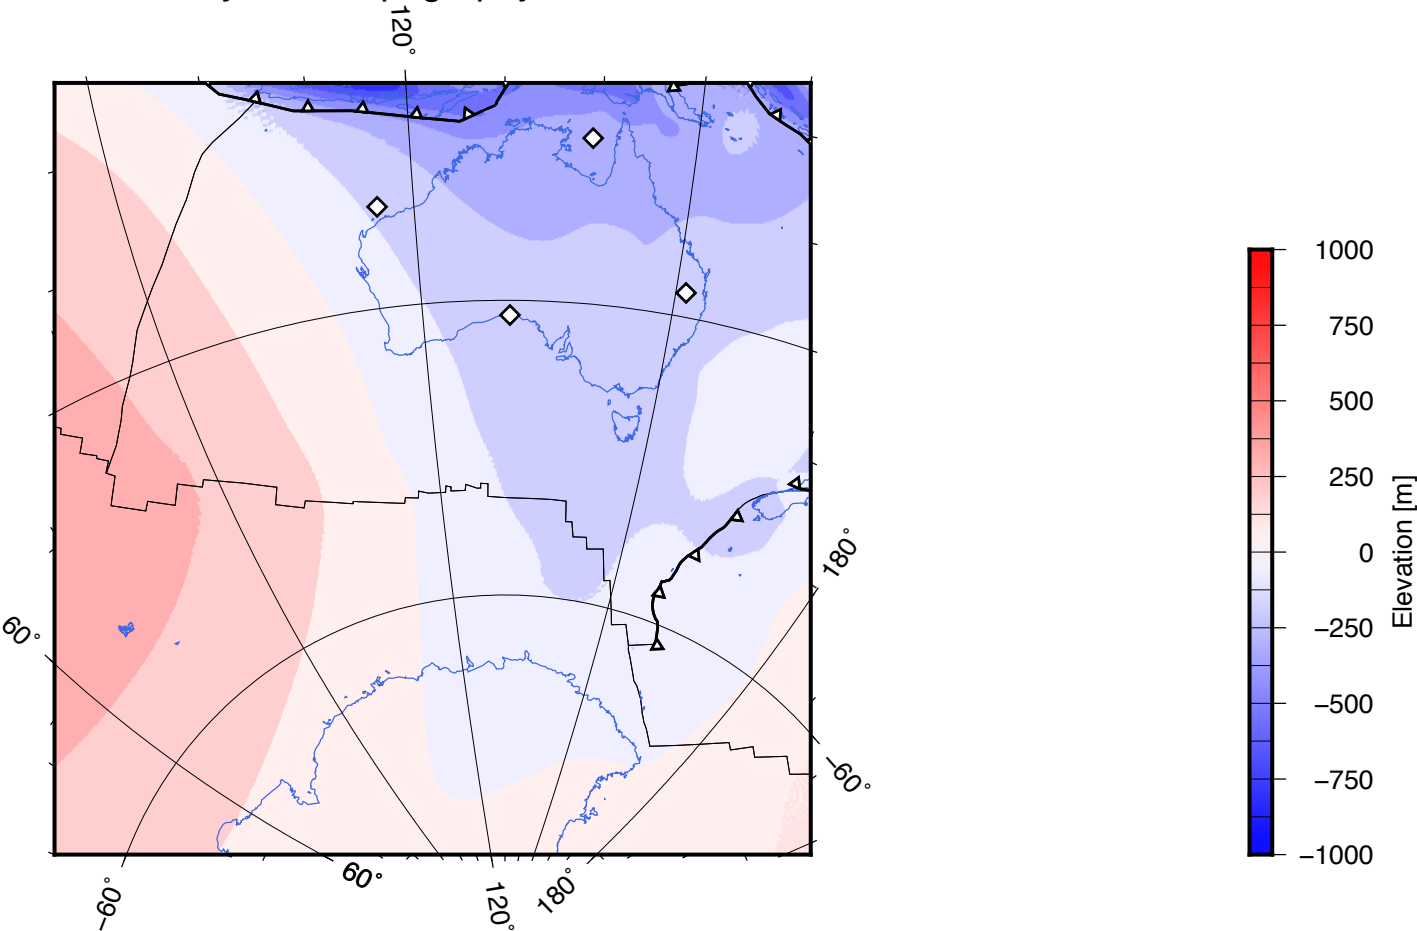

Supplement: Supplementary file 3 [file rubey_m_04_SUPP_DynaTopo.AUS_10Myr.pdf › Pics_App_FINAL/rubey_m_04_SUPP_DynaTopo.AUS_10Myr.pdf]
