# Supplementary figures and images for: Global patterns of Earth's dynamic topography since the Jurassic
Source: Copernicus journal article supplement (doi:10.5194/se-2017-26), 2017-03-23

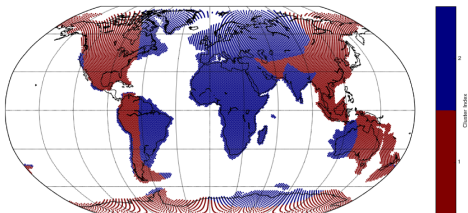

a

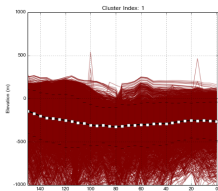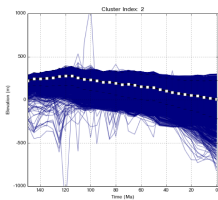

b

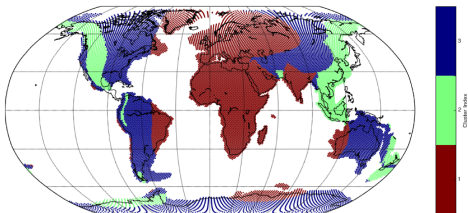

a

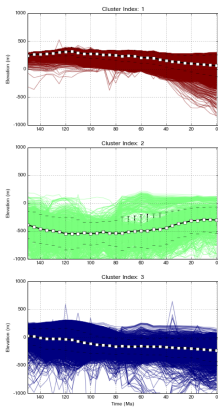

b

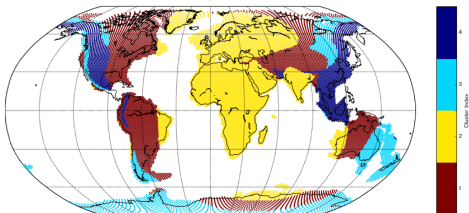

a

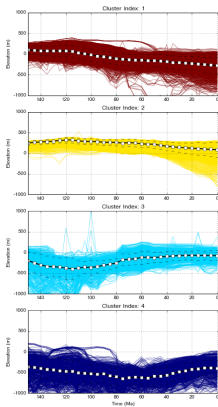

b

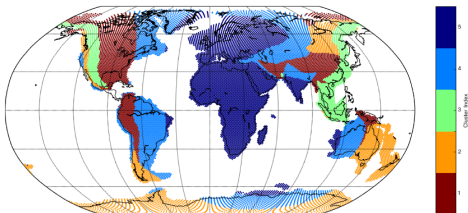

a

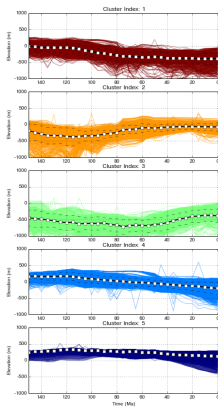

b

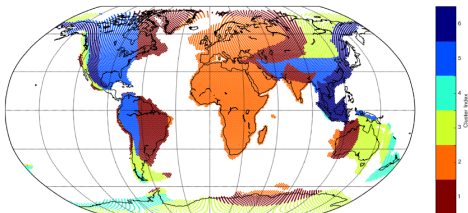

a

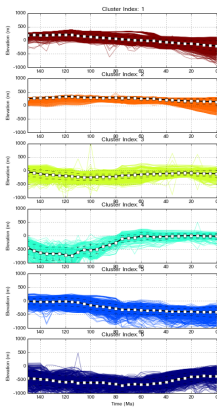

b

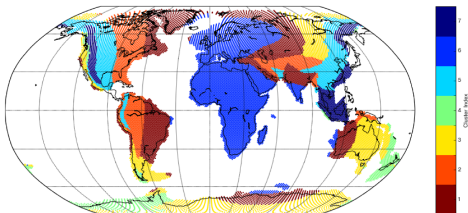

a

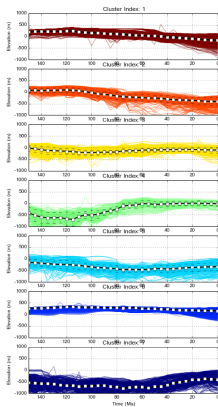

b

Supplement: Supplementary file 4 [file rubey_m_05_SUPP_Cluster_analysis.pdf › Pics_App_FINAL/rubey_m_05_SUPP_Cluster_analysis.pdf]
